# Supplementary material for: Is publication bias present in gastroenterological research? An analysis of abstracts presented at an annual congress
Source: PeerJ. 2018 Jun 22;6:e4995. doi: 10.7717/peerj.4995 (PMC6016530; doi:10.7717/peerj.4995)
Supplement: Data S1 [file peerj-06-4995-s001.xlsx]

## Sheet: Sheet1
Year	1. Presentation Title	Significant outcome?	Sample Size	2. Presentation Type	3. Did the presentation win any awards?	4. Presentation First Author's Name	5. Did the presentation reach publication?	Email address	Date sent First email:	Respond:	Date sent second email:	Response	6. Web link, Google Scholar link, PubMed ID?	7. Publication title?	8. Institution of publication's first author?	9. Date submitted to journal (Use 1st of the month if a day cannot be located)	10. Date accepted for publication (Use 1st of the month if a day cannot be located)	11. Publication Date in Print (Use 1st of the month if a day cannot be located)	12. Publication Date Online (Use 1st of the month if a day cannot be located)	13. Time to publication in months? (NUMBERS ONLY)	14. Name of journal of published study?	15. Impact Factor of journal of publication	Year of Conference
2011	LAPAROSCOPIC SPLEEN-PRESERVING DISTAL PANCREATECTOMY IN THE ELDERLY: INITIAL EXPERIENCE AND LESSONS LEARNED	yes	9	9	No	Keith Baldwin	Yes						https://www.ncbi.nlm.nih.gov/pmc/articles/PMC3183446/pdf/hpb0013-0621.pdf	Laparoscopic spleen-preserving distal pancreatectomy in elderly subjects: splenic vessel sacrifice may be associated with a higher rate of splenic infarction	Roger Williams Medical Center, Providence, RI	2011-03-25	2011-05-14			1	HPB
2011	MULTICENTRE STUDY OF LIVER METASTASIS FROM COLORECTAL CANCER ON PATHOLOGIC LIVERS	no info	20	3	No	Jose M Ramia	Yes						https://www.ncbi.nlm.nih.gov/pmc/articles/PMC3093643/	Multicentre study of liver metastases from colorectal cancer in pathological livers	1Hospital Universitario de Guadalajara, Guadalajara	2010-08-17	2010-12-16	2011-05-01		1	HPB
2013	INCIDENCE AND OUTCOMES OF HEPATOBLASTOMAS IN CHILDREN	yes	606	3	No	B. J. Allan	Yes						https://www.ncbi.nlm.nih.gov/pmc/articles/PMC3791112/	Predictors of survival and incidence of hepatoblastoma in the paediatric population	University Of Miami, Miami, FL, USA	2013-01-29	2013-03-17	2013-10-01	2013-04-22	1	HPB
2011	ALTERED EFFICACY OF AT1RTARGETED TREATMENTS FOR COLORECTAL CANCER LIVER METASTASIS RESULTING FROM AT1R UPREGULATION	no info	0	12	No	Jonya Chan	Yes						https://www.ncbi.nlm.nih.gov/pmc/articles/PMC3141779/pdf/1471-2407-11-274.pdf	Altered efficacy of AT1R-targeted treatment after spontaneous cancer cell-AT1R upregulation	The Department of Surgery, Austin Health, Heidelberg, VIC				2011-06-26	2	BMC cancer
2011	PURE LAPAROSCOPIC RIGHT HEPATECTOMY USING INTRAHEPATIC GLISSONIAN APPROACH	no info	1	5	No	M. A. Machado	Yes						https://link.springer.com/article/10.1007/s00464-011-1812-0	Intrahepatic Glissonian approach for pure laparoscopic right hemihepatectomy	University of Sao Paulo, Sao Paulo, SP, Brazil	2011-02-15	2011-06-02		2011-06-22	2	surgical endoscopy
2012	YIELD OF CLINICAL AND RADIOGRAPHIC SURVEILLANCE IN PATIENTS WITH RESECTED PANCREATIC ADENOCARCINOMA FOLLOWING MULTIMODALITY THERAPY	yes	327	3	No	C. D. Tzeng	Yes						https://www.ncbi.nlm.nih.gov/pmc/articles/PMC3384860/	Yield of clinical and radiographic surveillance in patients with resected pancreatic adenocarcinoma following multimodal therapy	The University Of Texas MD Anderson Cancer Center, Houston, TX	2011-10-24	2012-01-18	2012-06-01		2	HPB
2012	FAILURE TO COMPLY WITH NCCN GUIDELINES FOR MANAGEMENT OF PANCREATIC CANCER COMPROMISES OUTCOMES	yes	17970	3	No	B. C. Visser	Yes						https://www.ncbi.nlm.nih.gov/pubmed/22762402	Failure to comply with NCCN guidelines for the management of pancreatic cancer compromises outcomes.	1Stanford University Department Of Surgery, Stanford, CA	2012-03-21	2012-04-25	2012-08-01	2012-06-12	2	HPB
2013	PKI-587 AND SORAFENIB ADDITIVELY INHIBIT PROLIFERATION OF LIVER CANCER STEM CELLS AND HCC CELL LINES	yes	0	7	No	R. Gedaly	Yes						https://www.ncbi.nlm.nih.gov/pmc/articles/PMC4390173/	PKI-587 and sorafenib alone and in combination on inhibition of liver cancer stem cell proliferation	1Department Of Surgery, University Of Kentucky, Lexington, KY, USA			2013-11-01	2013-05-25	2	Journal of surgical resection
2011	THE ROLE OF LAPAROSCOPIC RESTAGING IN PATIENTS WITH INCIDENTAL GALLBLADDER CANCER	yes	143	3	No	Jean M. Butte	Yes						https://www.ncbi.nlm.nih.gov/pmc/articles/PMC3133713/pdf/hpb0013-0463.pdf	The role of laparoscopic staging in patients with incidental gallbladder cancer	Memorial Sloan-Kettering Cancer Center, New York, NY				2011-07-13	3	HPB
2011	ROLE OF ENDOSCOPIC ULTRASOUND AND CYST FLUID ANALYSIS IN INITIAL EVALUATION AND FOLLOW UP OF INCIDENTAL PANCREATIC CYSTIC LESIONS	no info	62	3	No	Andrei Cocieru	Yes						https://www.ncbi.nlm.nih.gov/pmc/articles/PMC3133712/pdf/hpb0013-0459.pdf	The role of endoscopic ultrasound and cyst fluid analysis in the initial evaluation and follow-up of incidental pancreatic cystic lesions	Danbury Hospital, Danbury, CT				2011-07-01	3	HPB
2011	PANCREATIC RESECTION WITHOUT ROUTINE INTRAPERITONEAL DRAINAGE	yes	227	11	No	W. E. Fisher	Yes						https://www.ncbi.nlm.nih.gov/pmc/articles/PMC3133717/pdf/hpb0013-0503.pdf	Pancreatic resection without routine intraperitoneal drainage	Baylor College of Medicine, Houston, TX				2011-07-01	3	HPB
2011	MAJOR VENOUS RESECTION DURING TOTAL LAPAROSCOPIC PANCREATICODUODENECTOMY	no info	10	9	No	Kendrick ML	Yes						https://www.ncbi.nlm.nih.gov/pubmed/21689228	Major venous resection during total laparoscopic pancreaticoduodenectomy.	Mayo Clinic College of Medicine, Rochester, MN				2011-07-01	3	HPB
2011	REFINING THE DEFINITION OF PERIOPERATIVE MORTALITY FOLLOWING HEPATECTOMY	no	2597	3	No	S C Mayo	Yes						https://www.ncbi.nlm.nih.gov/pmc/articles/PMC3133714/	Refining the definition of perioperative mortality following hepatectomy using death within 90 days as the standard criterion	1The Johns Hopkins Hospital, Baltimore, MD	2011-03-01	2011-04-08	2011-07-01		3	HPB
2011	PERCUTANEOUS TRANSHEPATIC ISLET CELL AUTOTRANSPLANTATION AFTER PANCREATECTOMY FOR CHRONIC PANCREATITIS: A NOVEL APPROACH	no info	36	11	No	K. A. Morgan	Yes						https://www.ncbi.nlm.nih.gov/pubmed/21689235	Percutaneous transhepatic islet cell autotransplantation after pancreatectomy for chronic pancreatitis: a novel approach.	Medical University of South Carolina, Charleston, SC	2011-03-25	2011-04-19	2011-07-01		3	HPB
2011	A STANDARD DEFINITION OF MAJOR HEPATECTOMY: RESECTION OF FOUR OR MORE LIVER SEGMENTS	yes	1670	3	No	S K Reddy	Yes						https://www.ncbi.nlm.nih.gov/pubmed/21689233	A standard definition of major hepatectomy: resection of four or more liver segments.	1University of Pittsburgh Medical Center, Pittsburgh, PA	2011-02-16	2011-04-18	2011-07-01	2015-12-16	3	HPB
2011	EVOLUTION OF THE SURGICAL MANAGEMENT OF PERIHILAR CHOLANGIOCARCINOMA IN A WESTERN CENTER DEMONSTRATES IMPROVED SURVIVAL WITH ENDOSCOPIC BILIARY DRAINAGE AND REDUCED USE OF BLOOD TRANSFUSION	yes	83	11	No	A L Young	Yes						https://www.ncbi.nlm.nih.gov/pubmed/21689232	Evolution of the surgical management of perihilar cholangiocarcinoma in a Western centre demonstrates improved survival with endoscopic biliary drainage and reduced use of blood transfusion.	St James’s University Hospital, Leeds, West Yorkshire	2011-02-15	2011-03-25	2011-07-01	2015-12-15	3	HPB
2012	PALLIATIVE SURGERY IN UNRESECTABLE PERIAMPULLARY CANCER: DOES OPERATIVE BYPASS DECREASE POSTOPERATIVE PROCEDURES AND HOSPITAL DAYS?	yes	157	3	No	J. M. Lyons	Yes						https://www.ncbi.nlm.nih.gov/pmc/articles/PMC3384877/	Operative procedures for unresectable pancreatic cancer: does operative bypass decrease requirements for postoperative procedures and in-hospital days?	1Roger Williams Medical Center, Providence	2012-03-14	2012-03-30	2012-07-01		3	HPB
2012	ADJUVANT ABLATION OF NEUROENDOCRINE METASTASES TO THE LIVER COMPLEMENTS SURGICAL RESECTION	yes	94	3	No	T. Taner	Yes						http://onlinelibrary.wiley.com/doi/10.1111/j.1477-2574.2012.00528.x/abstract	Adjunctive radiofrequency ablation of metastatic neuroendocrine cancer to the liver complements surgical resection	Mayo Clinic, Rochester, MN	2012-03-21	2012-06-03	2012-03-01	2012-07-26	3	HPB
2013	SAFETY AND EFFICACY OF LIGASURE USAGE IN PANCREATICODUODENECTOMIES: A RETROSPECTIVE EXPERIENCE	yes	148	3	No	O. S. Eng	Yes						https://www.ncbi.nlm.nih.gov/pmc/articles/PMC3791113/	Safety and efficacy of LigaSure usage in pancreaticoduodenectomy	1Division Of General Surgery, New Brunswick, NJ, USA	2013-02-05	2013-03-19	2013-10-01	2013-06-19	3	HPB
2013	DYSPLASIA AT THE SURGICAL MARGIN PREDICTS RECURRENCE FOLLOWING RESECTION OF NON-INVASIVE IPMN	yes	192	11	No	T. L. Frankel	Yes						https://www.ncbi.nlm.nih.gov/pmc/articles/PMC3791121/	Dysplasia at the surgical margin is associated with recurrence after resection of non-invasive intraductal papillary mucinous neoplasms	1Memorial Sloan-Kettering Cancer Center, New York, NY, USA;	2013-03-12	2013-05-11	2013-10-01	2013-06-19	3	HPB
2013	VIRAL STATUS AT THE TIME OF LIVER TRANSPLANTATION FOR HEPATOCELLULAR CARCINOMA: A PREDICTOR OF LONG-TERM SURVIVAL IN THE MODERN ERA	yes	7742	3	No	R. T. Groeschl	Yes						https://www.ncbi.nlm.nih.gov/pmc/articles/PMC3791119/	Viral status at the time of liver transplantation for hepatocellular carcinoma: a modern predictor of longterm survival	Medical College Of Wisconsin, Milwaukee, WI, USA	2013-02-28	2013-04-29	2013-10-01	2013-06-19	3	HPB
2011	HIGH GRADE DYSPLASIA AT CYSTIC DUCT MARGIN AFTER CHOLECYSTECTOMY	yes	8	3	No	K. A. Bickenbach	Yes						https://www.ncbi.nlm.nih.gov/pmc/articles/PMC3244625/	High-grade dysplasia of the cystic duct margin in the absence of malignancy after cholecystectomy	Memorial Sloan-Kettering Cancer Center, New York, NY	2011-06-23	2011-08-02			4	HPB
2011	DOES NEOADJUVANT CHEMOTHERAPY REVEAL DISEASE PRECLUDING SURGICAL TREATMENT OF INITIALLY RESECTABLE COLORECTAL LIVER METASTASES?	yes	203	3	No	SK Reddy	Yes						https://www.ncbi.nlm.nih.gov/pubmed/21842519	Does neoadjuvant chemotherapy reveal disease precluding surgical treatment of initially resectable colorectal cancer liver metastases?	University of Pittsburgh Medical Center, Pittsburgh, PA	2011-05-18	2011-07-05		2011-08-12	4	Journal of Surgical Oncology
2012	A MULTI-INSTITUTIONAL STUDY OF THE PROGNOSTIC IMPORTANCE OF LYMPHOVASCULAR OR PERINEURAL INVASION IN INTRAHEPATIC CHOLANGIOCARCINOMA: A NEW SELECTION CRITERION FOR ADJUVANT THERAPY?	yes	58	3	No	S. B. Fisher	Yes						https://www.ncbi.nlm.nih.gov/pmc/articles/PMC3406348/	Lymphovascular and perineural invasion as selection criteria for adjuvant therapy in intrahepatic cholangiocarcinoma: a multi-institution analysis	1Emory University, Division Of Surgical Oncology, Winship Cancer Institute, Atlanta, GA	2012-03-20	2012-04-17	2012-08-01		4	HPB
2012	SPONTANEOUS REGRESSION OF HCC IS MOST OFTEN ASSOCIATED WITH TUMOR HYPOXIA OR SYSTEMIC INFLAMMATORY RESPONSE	no info	71	4	No	J. I. Huz	Yes						https://www.ncbi.nlm.nih.gov/pmc/articles/PMC3406346/	Spontaneous regression of hepatocellular carcinoma is most often associated with tumour hypoxia or a systemic inflammatory response	New York University School Of Medicine, New York, NY	2012-03-21	2012-04-06	2012-08-01		4	HPB
2012	DOES RADICAL RESECTION CURE INCIDENTAL GALLBLADDER CANCER? A CRITICAL VIEW	yes	24	3	No	J. Lendoire	Yes						https://www.ncbi.nlm.nih.gov/pmc/articles/PMC3406352/	Relevance of residual disease after liver resection for incidental gallbladder cancer	Hospital Cosme Argerich, Liver And Transplant Division, Buenos Aires, Argentina	2012-03-14	2012-05-04	2012-08-01		4	HPB
2012	CENTER VOLUME AND RESOURCE CONSUMPTION IN LIVER TRANSPLANTATION	yes	5935	3	No	C. W. Macomber	Yes						https://www.ncbi.nlm.nih.gov/pmc/articles/PMC3406353/	Centre volume and resource consumption in liver transplantation	Surgical Outcomes Analysis & Research, UMass Medical School, Worcester, MA	2012-03-22	2012-05-04		2012-08-01	4	HPB
2012	NATURAL HISTORY OF ASYMPTOMATIC PANCREATIC CYSTIC NEOPLASMS	no info	338	11	No	G. Morris-Stiff	Yes						http://onlinelibrary.wiley.com/doi/10.1111/j.1477-2574.2012.00522.x/abstract	Natural history of asymptomatic pancreatic cystic neoplasms	Department Of General Surgery, Section Of Surgical Oncology/HPB, Cleveland, OH	2012-03-22	2012-05-30		2012-07-23	4	HPB
2012	SEQUENTIAL INTRA-ARTERIAL THERAPY AND PORTAL VEIN EMBOLIZATION IS FEASIBLE AND SAFE IN PATIENTS WITH ADVANCED PRIMARY AND SECONDARY LIVER MALIGNANCIES	no info	81	3	No	P. D. Peng	Yes						https://www.ncbi.nlm.nih.gov/pmc/articles/PMC3406349/	Sequential intra-arterial therapy and portal vein embolization is feasible and safe in patients with advanced hepatic malignancies	1Johns Hopkins Hospital, Baltimore, MD; 2University Of Calgary, Calgary, AB, Canada	2012-03-05	2012-04-03	2012-08-01		4	HPB
2012	RADIOFREQUENCY ABLATION VS. RESECTION FOR EARLY STAGE HEPATOCELLULAR CANCER: OUTCOMES FROM A WESTERN CENTER	no	111	3	No	S. Tohme	Yes						https://www.ncbi.nlm.nih.gov/pubmed/23374361	Radiofrequency ablation compared to resection in early-stage hepatocellular carcinoma.	1University Of Pittsburgh, Department Of Surgery, Pittsburgh, PA	2012-03-21	2012-07-04	2013-03-01	2012-08-10	4	HPB
2012	RISK OF VENOUS THROMBOEMBOLISM OUTWEIGHS POST-HEPATECTOMY BLEEDING COMPLICATIONS: ANALYSIS OF 5651 NSQIP PATIENTS	yes	5651	3	No	C. D. Tzeng	Yes						https://www.ncbi.nlm.nih.gov/pmc/articles/PMC3406347/	Risk of venous thromboembolism outweighs post-hepatectomy bleeding complications: analysis of 5651 National Surgical Quality Improvement Program patients	The University Of Texas MD Anderson Cancer Center, Houston, TX	2012-03-16	2012-04-06	2012-08-01		4	HPB
2012	ROLE OF OPERATIVE THERAPY IN TREATMENT OF INTRA AND EXTRAHEPATIC METASTATIC HEPATOCELLULAR CARCINOMA IN PATIENTS WITHOUT CIRRHOSIS	yes	195	2	No	V. Zaydfudim	Yes						https://www.ncbi.nlm.nih.gov/pubmed/22644447	Role of operative therapy in non-cirrhotic patients with metastatic hepatocellular carcinoma.	Mayo Clinic, Rochester, MN	2012-02-23	2012-05-15	2012-08-01	2012-05-30	4	Journal of Gastrointestinal surgery
2013	RIGHT POSTERIOR SECTORECTOMY IS PREFERRED OVER RIGHT HEPATECTOMY FOR POSTERIOR LESIONS: A DUAL-INSTITUTION STUDY	yes	580	3	No	S. B. Fisher	Yes						https://www.ncbi.nlm.nih.gov/pmc/articles/PMC3791114/	A comparison of right posterior sectorectomy with formal right hepatectomy: a dual-institution study	1The Winship Cancer Institute, Emory University, Atlanta, GA, USA	2013-03-06	2013-04-05	2013-10-01	2013-07-22	4	HPB
2013	EFFECT OF EXTERNAL BEAM RADIOTHERAPY ON SURVIVAL IN SURGICALLY RESECTED GALLBLADDER ADENOCARCINOMA – A PROPENSITY SCORE MATCHED SEER ANALYSIS	yes	5011	3	No	O. Hyder	Yes						https://www.ncbi.nlm.nih.gov/pubmed/23876364	Impact of adjuvant external beam radiotherapy on survival in surgically resected gallbladder adenocarcinoma: a propensity score-matched Surveillance, Epidemiology, and End Results analysis.	Johns Hopkins Hospital, Baltimore, MD, USA		2013-06-05	2014-01-01	2013-07-19	4	Surgery
2013	PANCREAS AND LIVER SURGERY IN JEHOVAH’S WITNESSES: FEASIBLE AND SAFE	no info	24	3	No	I. T. Konstantinidis	Yes						https://www.ncbi.nlm.nih.gov/pubmed/23880361	Pancreas and liver resection in Jehovah's Witness patients: feasible and safe.	Memorial Sloan-Kettering Cancer Center HepatoPancreatoBiliary Surgery Department, New York, NY, USA	2013-04-20	2013-05-17	2013-12-01	2013-07-21	4	Journal of the American College of Surgeons
2013	ASSESSING THE IMPACT OF FISTULAS AFTER PANCREATICODUODENECTOMY USING THE POSTOPERATIVE MORBIDITY INDEX (PMI)	yes	192	3	No	B. C. Miller	Yes						https://www.ncbi.nlm.nih.gov/pubmed/23869603	Assessing the impact of a fistula after a pancreaticoduodenectomy using the Post-operative Morbidity Index.	1Department Of Surgery, Hospital Of The University Of Pennsylvania, University Of Pennsylvania, Philadelphia, PA, USA	2013-03-18	2013-04-17	2013-10-01	2013-07-22	4	HPB
2013	DISCORDANCE BETWEEN CONVENTIONAL AND DETAILED LYMPH NODE ANALYSIS IN RESECTED BILIARY CARCINOMA AT OR ABOVE THE CYSTIC DUCT: ARE WE UNDERSTAGING PATIENTS?	yes	187	3	No	L. M. Ocuin	Yes						https://www.ncbi.nlm.nih.gov/pubmed/23884754	Discordance between conventional and detailed lymph node analysis in resected biliary carcinoma at or above the cystic duct: are we understaging patients?	1Department Of Surgery, Atlanta, GA, USA; 2Department Of Pathology, Atlanta, GA, USA	2013-04-16		2013-12-01	2013-07-25	4	Annals of Surgical Oncology
2013	DISTINCT PREDICTORS OF PRE- VERSUS POST-DISCHARGE VENOUS THROMBOEMBOLISM AFTER HEPATECTOMY: ANALYSIS OF 7,621 NSQIP PATIENTS	yes	7621	3	No	C. D. Tzeng	Yes						https://www.ncbi.nlm.nih.gov/pubmed/23869577	Distinct predictors of pre- versus post-discharge venous thromboembolism after hepatectomy: analysis of 7621 NSQIP patients.	The University Of Texas MD Anderson Cancer Center, Houston, TX, USA	2013-03-18	2013-04-15	2013-10-01	2013-07-22	4	HPB
2013	PREDICTING THE RISKS OF VENOUS THROMBOEMBOLISM VERSUS POST-PANCREATECTOMY HEMORRHAGE: ANALYSIS OF 13,771 NSQIP PATIENTS	yes	13771	3	No	C. D. Tzeng	Yes						https://www.ncbi.nlm.nih.gov/pubmed/23869628	Predicting the risks of venous thromboembolism versus post-pancreatectomy haemorrhage: analysis of 13,771 NSQIP patients.	The University Of Texas MD Anderson Cancer Center, Houston, TX, USA	2013-03-20	2013-05-26	2014-04-01	2013-07-22	4	HPB
2011	SIZE OF TUMOUR PREDICTS OUTCOME IN REDO RESECTION FOR COLORECTAL LIVER METASTASES	Yes	173	3	No	Rob Adair	Yes						https://www.ncbi.nlm.nih.gov/pubmed/22864889	Repeat hepatic resection for colorectal liver metastases.	St James’s University Hospital, Leeds, West Yorkshire		2012-05-15	2015-09-01	2012-08-02	5	British Journal of Surgery
2011	A comparison of monopolar to bipolar radiofrequency ablation of liver tumors	Yes	68	3	No	F. Alemi	Yes						https://www.ncbi.nlm.nih.gov/pmc/articles/PMC3183451/	Laparoscopic treatment of liver tumours using a two-needle probe bipolar radiofrequency ablation device	1 University of California, San Francisco, San Francisco, CA	2011-03-24	2011-05-14	2011-09-01	2011-09-01	5	HPB
2011	ANTITUMOR ACTIVITIES OF SUNITINIB IN COMBINATION WITH GEMCITABINE IN EXPERIMENTAL PANCREATIC CANCER	yes	0	7	No	Niranjan Awasthi	Yes						https://www.ncbi.nlm.nih.gov/pubmed/21843259	Antitumour activity of sunitinib in combination with gemcitabine in experimental pancreatic cancer.	University of Texas Southwestern Medical Center, Dallas, TX	2011-03-24	2011-04-30	2011-09-13	2011-09-13	5	HPB
2011	LYMPHADENECTOMY IN THE STAGING AND TREATMENT OF INTRAHEPATIC CHOLANGIOCARCINOMA – A POPULATION-BASED STUDY USING THE SEER DATABASE	yes	4946	2	No	Clancy J. Clark	Yes						https://www.ncbi.nlm.nih.gov/pmc/articles/PMC3183445/pdf/hpb0013-0612.pdf	Lymphadenectomy in the staging and treatment of intrahepatic cholangiocarcinoma: a population-based study using the National Cancer Institute SEER database	Mayo Clinic, Rochester, MN				2011-09-13	5	HPB
2011	WHAT IS THE ROLE OF INTRAOPERATIVE ULTRASOUND IN THE DETECTION OF HEPATIC LESIONS IN THE ERA OF MODERN PREOPERATIVE IMAGING?	yes	320	3	No	Mathieu D'Hondt	Yes						http://www.sciencedirect.com/science/article/pii/S1365182X15304937	Is intra-operative ultrasound still useful for the detection of a hepatic tumour in the era of modern pre-operative imaging?	1Hospital Saint Luc - CHUM, Montreal, QC				2011-09-01	5	HPB
2011	THE INTERACTION OF LOW STANDARD LIVER VOLUME, HIGH PACKED CELL VOLUME, PORTAL HYPERTENSION AND RISK OF PORTAL VEIN THROMBOSIS IN CLINICAL ISLET TRANSPLANTATION	yes	116	9	No	Toshiyasu Kawahara	Yes						https://www.ncbi.nlm.nih.gov/pmc/articles/PMC3226916/	Portal vein thrombosis is a potentially preventable complication in clinical islet transplantation	University of Alberta, Edmonton, Alberta				2011-08-29	5	American journal of transplantation
2011	NOVEL 3-D IMAGING TECHNIQUE IMPROVES ACCURACY OF HEPATIC VOLUMETRIC ASSESSMENT	no	32	3	No	R. V. Levy	Yes						https://www.ncbi.nlm.nih.gov/pmc/articles/PMC3183453/	Novel three-dimensional imaging technique improves the accuracy of hepatic volumetric assessment	Washington University School of Medicine, St. Louis, MO	2011-03-03	2011-05-22	2011-09-01		5	HPB
2011	DUCT-TO-DUCT BILIARY RECONSTRUCTION IN PATIENTS WITH PRIMARY SCLEROSING CHOLANGITIS UNDERGOING LIVER TRANSPLANTATION	no info	53	3	No	J. Modaresi	Yes						https://www.ncbi.nlm.nih.gov/pmc/articles/PMC3183450/	Duct-to-duct biliary reconstruction in patients with primary sclerosing cholangitis undergoing liver transplantation	Cleveland Clinic, Department of Hepato-Pancreato- Biliary/Liver Transplant Surgery, Cleveland, Ohio	2011-04-15	2011-05-22	2011-09-01		5	HPB
2011	RECURRENT HEPATOCELLULAR CANCER AFTER LIVER TRANSPLANT: IDENTIFYING THE HIGH-RISK PATIENT	yes	122	3	No	N N Nissen	Yes						https://www.ncbi.nlm.nih.gov/pmc/articles/PMC3183447/	Recurrent hepatocellular carcinoma after liver transplant: identifying the high-risk patient	Comprehensive Transplant Center – Cedars-Sinai Medical Center, Los Angeles, CA	2011-03-24	2011-05-22	2011-09-01		5	HPB
2011	EFFECT OF DONOR RISK INDEX (DRI) AND CENTER VOLUME ON LIVER TRANSPLANTATION OUTCOMES	yes	141	3	No	Ozhathil DK	Yes						https://www.ncbi.nlm.nih.gov/pubmed/21604357	Impact of center volume on outcomes of increased-risk liver transplants.		2010-11-11	2011-05-14	2011-10-01	2011-09-26	5	Liver Transplantation
2011	RADIOLOGIC AND INTRAOPERATIVE DETECTION OF NEED FOR MESENTERIC VEIN RESECTION IN PATIENTS WITH ADENOCARCINOMA OF THE HEAD OF THE PANCREAS	no info	100	9	No	Porembka MR	Yes						https://www.ncbi.nlm.nih.gov/pubmed/21843264	Radiologic and intraoperative detection of need for mesenteric vein resection in patients with adenocarcinoma of the head of the pancreas.	Washington University In Saint Louis, Department of Surgery, Saint Louis, MO	2011-03-10	2011-05-22	2011-09-12		5	HPB
2011	ADOPTIVE T-CELL TRANSFER TARGETING PANCREATIC CANCER	no info	0	7	No	Anna C Worth	Yes						https://www.ncbi.nlm.nih.gov/pmc/articles/PMC3183449/	Engineered T cells for pancreatic cancer treatment	Baylor College of Medicine, Houston, TX	2011-03-10	2011-05-24	2011-09-01		5	HPB
2012	SURGICAL MANAGEMENT TRENDS FOR CHOLANGIOCARCINOMA IN THE UNITED STATES 1998–2009	yes	32561	3	No	J. Anderson	Yes						https://www.researchgate.net/profile/Jamie_Anderson5/publication/230589222_Surgical_Management_Trends_for_Cholangiocarcinoma_in_the_USA_1998-2009/links/0deec52f900ba387ed000000.pdf	Surgical Management Trends for Cholangiocarcinoma in the USA 1998–2009	University Of California, San Diego, San Diego, CA	2012-06-15	2012-07-19		2012-07-31	5	Journal of Gastrointestinal Surgery
2012	POST-RESECTION DIABETES AFTER PANCREATICODUODENECTOMY: INCIDENCE AND PREDICTIVE FACTORS	yes	564	3	No	M. J. Ferrara	Yes						https://www.ncbi.nlm.nih.gov/pubmed/23374356	Immediate post-resection diabetes mellitus after pancreaticoduodenectomy: incidence and risk factors.	Mayo Clinic, Rochester, MN	2012-05-01	2012-05-21	2013-03-01	2012-09-10	5	HPB
2012	A 21-YEAR ANALYSIS OF T1 GALLBLADDER CARCINOMA: IS CHOLECYSTECTOMY ALONE ADEQUATE?	yes	2788	3	No	D. M. Hari	Yes						https://www.ncbi.nlm.nih.gov/pmc/articles/PMC3533711/	A 21-year analysis of stage I gallbladder carcinoma: is cholecystectomy alone adequate?	1John Wayne Cancer Institute, Santa Monica, CA	2012-03-14	2012-08-06	2013-01-02	2012-09-26	5	HPB
2012	HOSPITAL READMISSION AFTER PANCREATICODUODENECTOMY: AN EMERGING QUALITY METRIC	no	257	3	No	Z. J. Kastenberg	Yes						http://onlinelibrary.wiley.com/doi/10.1111/j.1477-2574.2012.00563.x/full	Hospital readmission after a pancreaticoduodenectomy: an emerging quality metric?	Department Of Surgery, Stanford University Medical Center, Stanford, CA	2012-05-18	2012-08-10	2013-02-01	2012-09-24	5	HPB
2012	DISSECTING SURVIVAL FOR RESECTED PANCREATIC DUCTAL ADENOCARCINOMA (PDAC) IN THE CONTEMPORARY ERA	yes	387	3	No	R. S. Lewis	Yes						https://www.ncbi.nlm.nih.gov/pmc/articles/PMC3533712/	A contemporary analysis of survival for resected pancreatic ductal adenocarcinoma	1The University Of Pennsylvania School Of Medicine, Philadelphia, PA	2012-07-01	2012-08-15	2013-01-01	2012-09-24	5	HPB
2013	HEPATIC OUTFLOW MODULATION TO TARGET LIVER REGENERATION	no info	1	4	No	S. Balzan	Yes						https://www.ncbi.nlm.nih.gov/pubmed/24075823	Outflow modulation to target liver regeneration: something old, something new.	1University Of Santa Cruz Do Sul – UNISC, Santa Cruz Do Sul, RS, Brazil	2013-05-12	2013-08-13	2014-02-01	2013-08-28	5	European Journal of Surgical Oncology (EJSO)
2013	IS IT WORTH THE RISK: THE MORBIDITY OF TOTAL PANCREATECTOMY WITH AUTO-ISLET CELL TRANSPLANTATION COMPARED TO TOTAL PANCREATECTOMY ALONE	yes	179	3	No	N. H. Bhayani	Yes						https://www.ncbi.nlm.nih.gov/pubmed/23992021	Morbidity of total pancreatectomy with islet cell auto-transplantation compared to total pancreatectomy alone.	Section Of Surgical Oncology, Department Of Surgery, Penn State Hershey Cancer Institute, Hershey, PA, USA	2013-03-27	2013-06-28	2014-06-01	2013-08-29	5	HPB
2013	COMPUTED TOMOGRAPHY PREDICTORS OF CHEMOEMBOLIZATION-INDUCED HEPATOCELLULAR CARCINOMA TUMOR NECROSIS	no	115	3	No	M. K. Bryant	Yes						https://www.ncbi.nlm.nih.gov/pmc/articles/PMC3967884/	Computed tomography predictors of hepatocellular carcinoma tumour necrosis after chemoembolization	University Of Alabama At Birmingham, Birmingham, AL, USA	2013-03-06	2013-05-26	2014-04-01	2013-08-26	5	HPB
2013	SURGICAL PORTO-SYSTEMIC SHUNTS IN THE ERA OF TIPS AND LIVER TRANSPLANTATION ARE STILL RELEVANT	yes	47	3	No	I. Gur	Yes						https://www.ncbi.nlm.nih.gov/pubmed/23961811	Surgical portosystemic shunts in the era of TIPS and liver transplantation are still relevant.	OHSU, Portland, OR, USA	2013-03-06	2013-06-10	2014-05-01	2013-08-20	5	HPB
2013	POST-TREATMENT SURVEILLANCE OF PATIENTS WITH HEPATOCELLULAR CARCINOMA: DOES INTENSITY OF FOLLOW-UP IMAGING IMPACT OUTCOMES	yes	2076	3	No	O. Hyder	Yes						https://www.ncbi.nlm.nih.gov/pmc/articles/PMC4048030/	Post-treatment surveillance of patients with colorectal cancer with surgically treated liver metastases	Johns Hopkins Hospital, Baltimore, MD, USA			2013-08-01		5	Surgery
2013	NONTHERAPEUTIC LAPAROTOMY INCIDENCE IS NOT AFFECTED BY VOLUME OF PANCREATICODUODENECTOMY FOR PANCREATIC ADENOCARCINOMA	no	443	2	No	P. Toomey	Yes						https://www.ncbi.nlm.nih.gov/pubmed/23896244	Nontherapeutic celiotomy incidence is not affected by volume of pancreaticoduodenectomy for pancreatic adenocarcinoma.	1Southeastern Center For Digestive Disorder And Pancreatic Cancer, Florida Hospital Tampa, Tampa, FL, USA			2013-08-01	2013-08-01	5	The american surgeon
2013	PREDICTORS OF MORBIDITY AND MORTALITY AFTER HEPATECTOMY IN ELDERLY PATIENTS: ANALYSIS OF 7,621 NSQIP PATIENTS	yes	7621	3	No	D. C. Tzeng	Yes						https://www.ncbi.nlm.nih.gov/pubmed/24033514	Predictors of morbidity and mortality after hepatectomy in elderly patients: analysis of 7621 NSQIP patients.	The University Of Texas MD Anderson Cancer Center, Houston, TX, USA	2013-03-19	2013-04-03	2014-05-01	2013-08-26	5	HPB
2013	SERUM CA 19–9 REPRESENTS A MARKER OF RESPONSE TO NEOADJUVANT THERAPY IN PATIENTS WITH BORDERLINE RESECTABLE PANCREATIC CANCER	yes	141	3	No	C. D. Tzeng	Yes						https://www.ncbi.nlm.nih.gov/pubmed/23991810	Serum carbohydrate antigen 19-9 represents a marker of response to neoadjuvant therapy in patients with borderline resectable pancreatic cancer.	1The University Of Texas MD Anderson Cancer Center, Houston, TX, USA	2013-04-02	2013-05-31	2014-05-01	2013-08-29	5	HPB
2013	PANCREATIC NEUROENDOCRINE TUMORS: HYPOENHANCEMENT ON ARTERIAL PHASE COMPUTED TOMOGRAPHY PREDICTS BIOLOGIC AGGRESSIVENESS	yes	118	3	No	D. J. Workunsky	Yes						https://www.ncbi.nlm.nih.gov/pubmed/23991643	Pancreatic neuroendocrine tumours: hypoenhancement on arterial phase computed tomography predicts biological aggressiveness.	Stanford University Medical Center, Stanford, CA, USA	2013-02-28	2013-05-05	2014-04-01	2013-08-29	5	HPB
2011	The prognostic importance of lymphovascular invasion in cholangiocarcinoma above the cystic duct: a new selection criterion for adjuvant therapy?	yes	69	3	yes		yes						https://www.ncbi.nlm.nih.gov/pmc/articles/PMC3183444/	same	emory	2011-05-03	2011-05-07	2011-09-01		5	HPB
2011	STANDARD LIVER VOLUME FORMULA FOR THE MIDDLE EASTERN ARABIC ADULTS	no	351	2	No	Al Ghamdi HM	Yes						https://www.ncbi.nlm.nih.gov/pubmed/21094823	Standard Formula for Liver Volume in Middle Eastern Arabic Adults	1King Fahad Specialist Hospital - Dammam, Dammam, Eastern Province;			2010-11-01		6	Transplantation Proceedings
2011	PRESENTATION AND OUTCOMES OF HEPATOCELLULAR CARCINOMA (HCC) PATIENTS AT A WESTERN CENTER	yes	1025	3	No	K Kitisin	Yes						https://www.ncbi.nlm.nih.gov/pubmed/21929672	Presentation and outcomes of hepatocellular carcinoma patients at a western centre.	1University of Pittsburgh Medical Center, Pittsburgh, Pennsylvania	2011-03-24	2011-05-30	2011-10-01		6	HPB
2011	RIGHT TRISECTIONECTOMY WITH EN BLOC PORTAL VEIN AND BILE DUCT RESECTION FOR RIGHT-SIDED KLATSKIN TUMOR: NO-TOUCH TECHNIQUE	no info	1	5	No	Machado MA	Yes						https://www.ncbi.nlm.nih.gov/pubmed/21997349	Right trisectionectomy with principle en bloc portal vein resection for right-sided hilar cholangiocarcinoma: no-touch technique.	Department of Gastroenterology, Surgical Division, University of Sao Paulo, Sao Paulo, SP	2011-02-10		2012-04-01	2011-10-15	6	Annals of Surgical Oncology
2011	THE ANATOMIC COURSE OF THE FIRST JEJUNAL BRANCH OF THE SUPERIOR MESENTERIC VEIN IN RELATION TO THE SUPERIOR MESENTERIC ARTERY	yes	300	3	No	Pavlos Papavasiliou	Yes						https://www.hindawi.com/journals/ijso/2012/538769/	The Anatomic Course of the First Jejunal Branch of the Superior Mesenteric Vein in Relation to the Superior Mesenteric Artery	Fox Chase Cancer Center, Philadelphia, PA	2011-10-01	2011-10-13			6	International Journal of Surgical Oncology
2011	SURVIVAL IMPACT OF MALIGNANT PANCREATIC NEUROENDOCRINE AND ISLET CELL NEOPLASM PHENOTYPES	yes	2350	3	No	Roland CL	Yes						https://www.ncbi.nlm.nih.gov/pubmed/22006521	Survival impact of malignant pancreatic neuroendocrine and islet cell neoplasm phenotypes.	University of Texas Southwestern Medical Center, Dallas, TX	2011-06-05	2011-09-21	2012-05-01	2011-10-17	6	journal of surgical oncology
2012	DO INDETERMINATE PULMONARY NODULES REPRESENT LUNG METASTASES IN PATIENTS UNDERGOING LIVER RESECTION FOR HEPATOBILIARY MALIGNANCIES?	yes	87	3	No	S. Downs-Canner	Yes						https://www.ncbi.nlm.nih.gov/pubmed/23086449	Indeterminate pulmonary nodules represent lung metastases in a significant portion of patients undergoing liver resection for malignancy.	University Of Pittsburgh Medical Center, Liver Cancer Center, Pittsburgh, PA	2012-05-17	2012-10-11	2012-12-01	2012-10-20	6	Journal of Gastrointestinal Surgery
2012	LAPAROSCOPIC LEFT HEMIHEPATECTOMY FOR LEFT-SIDED HILAR CHOLANGIOCARCINOMA WITH BILIARY RECONSTRUCTION BY THE HYBRID METHOD	no info	1	4	No	M. A. Machado	Yes						https://www.ncbi.nlm.nih.gov/pubmed/23101791	Laparoscopic resection of hilar cholangiocarcinoma.	University Of Sao Paulo, Sao Paulo, SP, Brazil			2012-12-01	2012-10-25	6	Journal of Laparoendoscopic & Advanced Surgical Techniques
2012	A SIMPLE ALGORITHM OF EARLY DRAIN REMOVAL AFTER PANCREATICODUODENECTOMY	no info	101	14	No	V. Menon	Yes						http://www.ingentaconnect.com/content/sesc/tas/2012/00000078/00000010/art00029	A Simple Algorithm for Drain Management after Pancreaticoduodenectomy	Cedars-Sinai Medical Center, Los Angeles, CA			2012-10-01		6	The american surgeon
2012	UP FRONT HEPATIC RESECTION FOR METASTATIC COLORECTAL CANCER RESULTS IN FAVORABLE LONG-TERM SURVIVAL	no info	320	3	No	S. Nanji	Yes						https://www.ncbi.nlm.nih.gov/pubmed/23054102	Up-front hepatic resection for metastatic colorectal cancer results in favorable long-term survival.	1Queen’s University, Department Of Surgery, Kingston, Ontario, Canada;	2011-08-15	2012-10-05	2013-01-01	2012-10-05	6	Annals of Surgical Oncology
2012	ROBOTIC VERSUS LAPAROSCOPIC LEFT LATERAL SECTIONECTOMY: COMPARISON OF CLINICAL AND ECONOMIC OUTCOMES	yes	30	3	No	V. Packiam	Yes						https://www.ncbi.nlm.nih.gov/pmc/articles/PMC3509231/	Minimally-Invasive Liver Resection: Robotic Versus Laparoscopic Left Lateral Sectionectomy	1University Of Pittsburgh School Of Medicine, Pittsburgh, PA			2012-12-01	2012-10-05	6	Journal of Gastrointestinal surgery
2013	DOES NEOADJUVANT RADIATION THERAPY FOR PANCREATIC CANCER INCREASE POST-OPERATIVE COMPLICATIONS AFTER PANCREATICODUODENECTOMY? ANALYSIS OF AMERICAN COLLEGE OF SURGEONS NATIONAL SURGICAL QUALITY IMPROVEMENT PROGRAM (ACS NSQIP)	yes	4416	3	No	S. W. Cho	Yes						https://www.ncbi.nlm.nih.gov/pmc/articles/PMC3967887/	Neoadjuvant radiation therapy and its impact on complications after pancreaticoduodenectomy for pancreatic cancer: analysis of the American College of Surgeons National Surgical Quality Improvement Program (ACS-NSQIP)	Providence Portland Medical Center, Portland, OR, USA	2013-03-05	2013-05-16	2014-04-01	2013-09-24	6	HPB
2013	IMPACT OF SARCOPENIA ON OUTCOMES FOLLOWING INTRA-ARTERIAL THERAPY OF HEPATIC MALIGNANCIES	yes	216	3	No	R. Dodson	Yes						https://www.ncbi.nlm.nih.gov/pubmed/24065364	Impact of sarcopenia on outcomes following intra-arterial therapy of hepatic malignancies.	Johns Hopkins Hospital, Baltimore, MD, USA	2013-05-19	2013-08-30	2013-12-01	2013-09-25	6	Journal of Gastrointestinal Surgery
2013	ALTERED LYSOPHOSPHATIDIC ACID RECEPTOR EXPRESSION DURING HEPATIC REGENERATION	yes	0	12	No	K. A. Simo	Yes						https://www.ncbi.nlm.nih.gov/pmc/articles/PMC4048075/	Altered lysophosphatidic acid (LPA) receptor expression during hepatic regeneration in a mouse model of partial hepatectomy	Carolinas Medical Center, Charlotte, NC, USA	2013-03-27	2013-07-28	2014-06-01	2013-09-24	6	HPB
2013	FAILURE TO FOLLOW EVIDENCE-BASED, BEST-PRACTICE GUIDELINES IN THE TREATMENT OF SEVERE PANCREATITIS	no info	40	3	No	A. Vlada	Yes						https://www.ncbi.nlm.nih.gov/pmc/articles/PMC3791122/	Failure to follow evidence-based best practice guidelines in the treatment of severe acute pancreatitis	University Of Florida, Gainesville, FL, USA	2013-03-11	2013-05-16	2013-10-01	2013-09-13	6	HPB
2011	REPEAT HEPATECTOMY FOR RECURRENT COLORECTAL LIVER METASTASES IS ASSOCIATED WITH HIGH SURVIVAL RATE	yes	115	11	No	A. Brouquet	Yes						https://www.ncbi.nlm.nih.gov/pmc/articles/PMC3238011/	Repeat hepatectomy for recurrent colorectal liver metastases is associated with a high survival rate	MD Anderson Cancer Center, Houston, TX			2011-11-01		7	HPB
2011	EXTERNAL VALIDATION OF A PREOPERATIVE NOMOGRAM TO PREDICT RISK OF PERI-OPERATIVE MORTALITY FOLLOWING LIVER RESECTIONS FOR MALIGNANCY	no info	794	3	No	Mashaal Dhir	Yes						https://www.ncbi.nlm.nih.gov/pmc/articles/PMC3238017/	External validation of a pre-operative nomogram predicting peri-operative mortality risk after liver resections for malignancy	1University of Nebraska Medical Center, Omaha, NE				2011-11-01	7	HPB
2011	ROUTINE NASOGASTRIC SUCTION IS UNNECESSARY AFTER PANCREATIC RESECTION	no	227	11	No	W. E. Fisher	Yes						https://www.ncbi.nlm.nih.gov/pmc/articles/PMC3238013/	ROUTINE NASOGASTRIC SUCTION IS UNNECESSARY AFTER PANCREATIC RESECTION	Baylor College of Medicine, Houston, TX				2011-11-01	7	HPB
2011	WHICH IS MORE COST-EFFECTIVE UNDER THE MELD SYSTEM-LIVER TRANSPLANTATION, PRIMARY LIVER RESECTION, OR LOCO-REGIONAL THERAPY AND SALVAGE TRANSPLANTATION FOR HCC WITHIN MILAN CRITERIA?	no info	0	13	No	Matthew P Landman	Yes						https://www.ncbi.nlm.nih.gov/pmc/articles/PMC3238012/	Which is more cost-effective under the MELD system: primary liver transplantation, or salvage transplantation after hepatic resection or after loco-regional therapy for hepatocellular carcinoma within Milan criteria?		2011-03-16	2011-05-30	2011-11-01	2015-12-16	7	HPB
2011	INFERIOR VENA CAVA RESECTION WITH HEPATECTOMY: CHALLENGING BUT JUSTIFIED	no info	35	9	No	Deep J Malde	Yes						https://www.ncbi.nlm.nih.gov/pmc/articles/PMC3238015/	Inferior vena cava resection with hepatectomy: challenging but justified	The Hepatobiliary and Transplant Unit, St. James University Hospital, Leeds, West Yorkshire	2011-03-27	2011-06-19	2011-11-01		7	HPB
2011	BILE DUCT INJURY REPAIR: TRANSITION TO A HIGH VOLUME CENTER IMPACTS IN OUTCOME	no info	312	3	No	Miguel Ángel Mercado	Yes						https://www.ncbi.nlm.nih.gov/pmc/articles/PMC3238010/	Transition from a low- to a high-volume centre for bile duct repair: changes in technique and improved outcome	Instituto Nacional de Ciencias Medicas Y Nutricion, Mexico City, Distrito Federal	2011-02-18	2011-05-31	2011-11-01		7	HPB
2011	OUTCOME OF PANCREATIC REMNANT FOLLOWING SEGMENTAL PANCREATECTOMY FOR NONINVASIVE INTRADUCTAL PAPILLARY MUCINOUS NEOPLASM (IPMN)	no info	193	11	No	Jacob R. Miller	Yes						https://www.ncbi.nlm.nih.gov/pmc/articles/PMC3238009/	Outcome of the pancreatic remnant following segmental pancreatectomy for non-invasive intraductal papillary mucinous neoplasm	1Indiana University School of Medicine, Indianapolis, IN	2011-03-25	2011-05-31	2011-11-01		7	HPB
2011	MRNA GENE EXPRESSION CORRELATES WITH HISTOLOGICAL INJURY ASSOCIATED WITH CHEMOTHERAPY	yes	220	7	No	Charles HC Pilgrim	Yes						https://www.ncbi.nlm.nih.gov/pmc/articles/PMC3238016/	mRNA gene expression correlates with histologically diagnosed chemotherapy-induced hepatic injury	1Peter MacCallum Cancer Centre, East Melbourne, Victoria; 2The Alfred Hospital, Melbourne, Victoria;	2011-03-24	2011-06-19	2011-11-01		7	HPB
2011	OUTCOMES OF PARTIAL LIVER TRANSPLANTATION: DECEASED DONOR SPLIT VS LIVE DONOR LIVER TRANSPLANTATION	yes	2272	3	No	Reza F Saidi	Yes						https://www.ncbi.nlm.nih.gov/pmc/articles/PMC3238014/	Outcomes in partial liver transplantation: deceased donor split-liver vs. live donor liver transplantation	University of Massachusetts Medical School, Worcester, MA	2011-03-15	2011-06-08	2011-11-01		7	HPB
2011	DIAGNOSTIC UTILITY OF THE MODERN SILVERHAWK ATHERECTOMY CATHETER: A PILOT STUDY	no info	40	3	No	J schwartz	Yes	jason.schwartz@utsouthwestern.edu		no - invalid email			https://www.ncbi.nlm.nih.gov/pmc/articles/PMC3238018/	Using the modern Silverhawk™ atherectomy catheter to characterize biliary structures that appear malignant: review of initial experience	University of Utah, Salt Lake City, UT	2011-04-08	2011-07-23	2011-11-01		7	HPB
2011	HEPATIC RESECTION FOR METASTATIC GASTROINTESTINAL STROMAL TUMORS IN THE TYROSINE KINASE INHIBITOR ERA	no info	22	3	No	RS Turley	Yes						https://www.ncbi.nlm.nih.gov/pubmed/22086856	Hepatic resection for metastatic gastrointestinal stromal tumors in the tyrosine kinase inhibitor era.	1Duke University Department of Surgery, Durham, NC	2011-06-21	2011-08-29	2012-07-15	2011-11-15	7	Cancer
2012	STAGED LIVER RESECTIONS FOR BILOBAR HEPATIC COLORECTAL METASTASIS: A SINGLE CENTER EXPERIENCE	no info	90	3	No	M. H. Jamal	YES	Dr. Al-Jiffry - dr.aljiffry@gmail.com		YES- yes			https://www.ncbi.nlm.nih.gov/pmc/articles/PMC3482675/	Staged hepatectomy for bilobar colorectal hepatic metastases	McGill University Health Center, Montreal, QC, Canada	2012-04-23	2012-07-04	2012-11-01		7	HPB
2012	MASSIVE HEPATOCELLULAR CARCINOMA IS ASSOCIATED WITH YOUNG, CHRONIC HEPATITIS B CARRIERS WITH NON-CIRRHOTIC LIVERS	yes	362	3	No	U. Sarpel	Yes						https://www.ncbi.nlm.nih.gov/pmc/articles/PMC3482669/	Inverse relationship between cirrhosis and massive tumours in hepatocellular carcinoma	New York University Medical Center, New York, NY	2012-04-23	2012-05-16	2012-11-01		7	HPB
2013	A COMPARISON OF PANCREATICODUODENECTOMY TO TOTAL PANCREATECTOMY FOR PANCREATIC NEOPLASIA – A NATIONAL SURGICAL QUALITY IMPROVEMENT PROJECT ANALYSIS	yes	5195	3	No	N. H. Bhayani	Yes						https://www.ncbi.nlm.nih.gov/pubmed/24165872	Perioperative outcomes of pancreaticoduodenectomy compared to total pancreatectomy for neoplasia.	Section Of Surgical Oncology, Department Of Surgery, Penn State Hershey Cancer Institute, Hershey, PA, USA	2013-07-15	2013-10-15	2014-03-01	2013-10-29	7	Journal of Gastrointestinal Surgery
2013	PROGNOSTIC LIMITATIONS OF THE CLINICAL RISK SCORE: A CONDITIONAL SURVIVAL ANALYSIS IN PATIENTS WITH COLORECTAL LIVER METASTASIS	yes	808	3	No	M. Tan	Yes						http://www.sciencedirect.com/science/article/pii/S1365182X15313290	Prognostic significance of early recurrence: a conditional survival analysis in patients with resected colorectal liver metastasis	Memorial Sloan-Kettering Cancer Center, New York, NY, USA	2013-03-07	2013-04-29	2013-10-01	2015-12-16	7	HPB
2013	LAPAROSCOPIC RADIOFREQUENCY ABLATION OF LIVER METASTASES FROM BREAST CANCER	yes	56	11	No	Y. Tasci	Yes						https://www.ncbi.nlm.nih.gov/pubmed/24028270	A comparison of laparoscopic radiofrequency ablation versus systemic therapy alone in the treatment of breast cancer metastasis to the liver.	Cleveland Clinic, Cleveland, OH, USA	2013-01-16	2013-04-29	2013-10-01	2015-12-16	7	HPB
2011	PANCREATIC NEOPLASMS IN PREGNANCY: A CASE REPORT AND REVIEW OF THE LITERATURE	no info	1	4	No	Casey Boyd	Yes	caboyd@utmb.edu		no - invalid email			https://www.ncbi.nlm.nih.gov/pmc/articles/PMC3354643/	Pancreatic Neoplasms in Pregnancy: Diagnosis, Complications, and Management	University of Texas-Medical Branch, Galveston, TX			2012-05-01	2011-12-09	8	Journal of Gastrointestinal Surgery
2011	PANCREATITIS-INDUCED SPLENIC VEIN THROMBOSIS: A SYSTEMATIC REVIEW AND META-ANALYSIS OF ITS RATE OF OCCURRENCE AND FREQUENCY OF ASSOCIATED GASTROINTESTINAL BLEEDING	no info	0	10	No	James R. Butler	Yes						https://www.ncbi.nlm.nih.gov/pmc/articles/PMC3244622/pdf/hpb0013-0839.pdf	Natural history of pancreatitis-induced splenic vein thrombosis: a systematic review and meta-analysis of its incidence and rate of gastrointestinal bleeding	Department of Surgery Indiana University School of Medicine, Indianapolis, IN, USA				2011-12-01	8	HPB
2011	A RANDOMIZED TRIAL OF GENOMIC DATA SHARING OPTIONS IN PANCREAS TISSUE DONORS	no	101	1	No	W. E. Fisher	Yes	wfisher@bcm.edu		YES - yes			https://www.ncbi.nlm.nih.gov/pubmed/?term=21785360	To share or not to share: a randomized trial of consent for data sharing in genome research.	Center for Medical Ethics and Health Policy, Baylor College of Medicine, Houston, TX			2011-11-01		8	Genet Med
2011	FACTORS ASSOCIATED WITH RECIDIVISM FOLLOWING PANCREATICODUODENECTOMY	yes	124	3	No	SS Grewal	Yes						https://www.ncbi.nlm.nih.gov/pubmed/22081922	Factors associated with recidivism following pancreaticoduodenectomy.	1The Pancreatic Disease Center , Cincinnati, Ohio				2011-12-01	8	HPB
2011	CONDITIONAL SURVIVAL IN PANCREATIC CANCER: BETTER THAN EXPECTED	no info	188	3	No	TS Kent	Yes						https://www.ncbi.nlm.nih.gov/pmc/articles/PMC3244627/	Conditional survival in pancreatic cancer: better than expected	Beth Israel Deaconess Medical Center, Boston, MA				2011-12-01	8	HPB
2011	SUB-CENTIMETER COLORECTAL CANCER LIVER METASTASES ARE EFFECTIVELY TREATED BY ABLATION	yes	351	3	No	T Kingham	Yes	kinghamt@mskcc.org		YES - published			https://www.ncbi.nlm.nih.gov/pmc/articles/PMC4529120/	A Retrospective Comparison of Microwave Ablation vs. Radiofrequency Ablation for Colorectal Cancer Hepatic Metastases	1Memorial Sloan-Kettering Cancer Center, New York,			2014-12-01	2014-03-01	8	Annals of surgical oncology
2011	SAFETY OF HEPATIC RESECTIONS IN OBESE VETERANS	yes	403	3	No	J K Saunders	Yes						http://jamanetwork.com/journals/jamasurgery/fullarticle/1151005	Safety of Hepatic Resections in Obese Veterans	1New York University School of Medicine, New York, NY		10/12/0011	2012-04-01	2011-12-19	8	Archives of Surgery
2012	ROBOT-ASSISTED RESECTION OF CHOLEDOCHOCELE IN AN ADULT WITH HEPATICOJEJUNOSTOMY AND INTRACORPOREAL ROUX-EN-Y ANASTOMOSIS	no info	1	4	No	S. G. Carpenter	Yes						https://link.springer.com/article/10.1007/s11701-012-0389-5	Robotic resection of choledochocele in an adult with intracorporeal hepaticojejunostomy and Roux-en-Y anastomosis: encouraging progress for robotic surgical treatment of biliary disease	1Mayo Clinic Arizona, Division Of Transplant Surgery, Phoenix, AZ	2012-08-29	2012-12-12	2014-03-01	2012-12-27	8	Journal of Robotic surgery
2012	SIMULTANEOUS COLORECTAL AND HEPATIC PROCEDURES FOR COLORECTAL CANCER: INCREASED MORBIDITY BUT EQUIVALENT MORTALITY TO COLORECTAL OR HEPATIC PROCEDURES ALONE – OUTCOMES FROM THE NATIONAL SURGICAL QUALITY IMPROVEMENT PROJECT (NSQIP)	yes	22534	3	No	O. Hamed	Yes						https://www.ncbi.nlm.nih.gov/pmc/articles/PMC3948537/	Simultaneous colorectal and hepatic procedures for colorectal cancer result in increased morbidity but equivalent mortality compared with colorectal or hepatic procedures alone: outcomes from the National Surgical Quality Improvement Program	Surgical Oncology – Penn State College Of Medicine, Hershey, PA	2012-09-17	2012-11-12	2013-09-01	2012-12-27	8	HPB
2012	VALUE OF INTRA-OPERATIVE ULTRASOUND FOR THE PERFORMANCE OF PANCREATIC SURGERY: A MULTIDISCIPLINARY ASSESSMENT	yes	199	3	No	J. Ni Mhuircheartaigh	Yes						https://www.ncbi.nlm.nih.gov/pubmed/23220893	Pancreatic surgery: a multidisciplinary assessment of the value of intraoperative US.	1Beth Israel Deaconess Medical Center, Boston, MA			2013-03-01	2012-12-06	8	Radiology Society of North America
2012	VOLUMETRIC ASSESSMENT OF SINGLE APPLICATION, SINGLE ANTENNA MICROWAVE ABLATION OF LIVER LESIONS ON CT IMAGING	no info	192	3	No	E. Sindram	Yes						https://www.jstage.jst.go.jp/article/jmicrowavesurg/31/1/31_1/_article/-char/ja/	Volumetric Assessment of Single Application, Single Antenna Microwave Ablation of Liver Lesions on Computed Tomography Imaging	Carolinas Medical Center – Dept. Of General Surgery, Div. Of Hepatobiliary And Pancreas Surgery, Charlotte, NC					8	Journal of microwave surgery
2012	INHIBITOR OF DIFFERENTIATION-1 (ID1) EXPRESSION CORRELATES WITH SRC ACTIVATION AND TUMOR DIFFERENTIATION IN HUMAN PANCREATIC CANCER SPECIMENS	yes	100	11	No	J. G. Trevino	Yes						https://www.ncbi.nlm.nih.gov/pmc/articles/PMC3540937/pdf/neo1412_1102.pdf	Nicotine Induces Inhibitor of Differentiation-1 in a Src-dependent Pathway Promoting Metastasis and Chemoresistance in Pancreatic Adenocarcinoma	1University of Florida-Gainesville, Gainesville, FL	2012-06-29	2012-10-15	2012-12-01		8	Neoplasia
2012	THE SIX-DAY WHIPPLE PATHWAY	no info	113	9	No	D. M. Walters	Yes						https://www.ncbi.nlm.nih.gov/pubmed/23458383	A 6-day clinical pathway after a pancreaticoduodenectomy is feasible, safe and efficient.	The University Of Virginia, Department Of Surgery, Charlottesville, VA	2012-07-23	2012-10-18	2013-09-01	2012-12-02	8	HPB
2013	RANKINGS VS. REALITY FOR PANCREATIC CANCER SURGERY: A REAL WORLD COMPARISON	no info	804	3	No	Z. Chau	Yes						https://www.ncbi.nlm.nih.gov/pmc/articles/PMC4048074/	Rankings versus reality in pancreatic cancer surgery: a real-world comparison	1University Of Massachusetts Medical School, Worcester, MA, USA	2013-05-06	2013-06-28	2014-06-01	2013-11-07	8	HPB
2013	DOES TRAVEL DISTANCE INFLUENCE LENGTH OF STAY IN ELECTIVE PANCREATIC SURGERY?	yes	243	3	No	K. L. Jackson	Yes						https://www.ncbi.nlm.nih.gov/pmc/articles/PMC4048076/	Does travel distance influence length of stay in elective pancreatic surgery?	1Department Of Surgery, Salt Lake City, UT, USA	2013-03-20	2013-07-28	2014-06-01	2013-11-07	8	HPB
2011	CORRECT UTILIZATION OF HEPATITIS B CORE ANTIBODY POSITIVE DONOR LIVER GRAFTS	yes	25	3	No	Malcolm P MacConmara	Yes						https://www.ncbi.nlm.nih.gov/pmc/articles/PMC3252990/	Utilization of hepatitis B core antibody-positive donor liver grafts	Department of Surgery, Section of Transplant Surgery, St. Louis, Missouri	2011-03-24	2011-09-12	2012-01-01		9	HPB
2012	COAGULOPATHY FOLLOWING LIVER RESECTION: IS IT OVERDIAGNOSED AND OVERTREATED?	yes	40	11	No	J. S. Barton	Yes						https://www.ncbi.nlm.nih.gov/pmc/articles/PMC4503284/	Coagulopathy after a liver resection: is it over diagnosed and over treated?	Oregon Health And Science University, Portland, OR	2012-07-31	2012-10-17	2013-11-01	2013-01-29	9	HPB
2012	EVALUATION OF STAPLER HEPATECTOMY DURING LAPAROSCOPIC LIVER RESECTION	yes	1499	3	No	J. F. Buell	Yes						https://www.ncbi.nlm.nih.gov/pmc/articles/PMC4503281/	Evaluation of stapler hepatectomy during a laparoscopic liver resection	International Consensus Group For Laparoscopic Liver Surgery, And Tulane University, New Orleans, LA	2012-03-12	2012-11-28	2013-11-01	2013-01-08	9	HPB
2012	DISTAL SPLENORENAL AND MESOCAVAL SHUNTING AT THE TIME OF PANCREATECTOMY FOR CANCER	no info	10	11	No	K. K. Christians	Yes						http://www.sciencedirect.com/science/article/pii/S0039606012007325	Distal splenorenal and temporary mesocaval shunting at the time of pancreatectomy for cancer: Initial experience from the Medical College of Wisconsin	1Medical College Of Wisconsin, Milwaukee, WI	2012-11-16	2012-11-16	2013-07-01	2013-01-07	9	Surgery
2012	SURGICAL RESECTION IN HEPATOCELLULAR CARCINOMA PATIENTS WITH MINIMAL BACKGROUND FIBROSIS; A STRATEGY IN THE ERA OF ORGAN SHORTAGE	yes	4554	3	No	R. T. Groeschl	Yes						https://www.ncbi.nlm.nih.gov/pubmed/23334253	Surgical resection in hepatocellular carcinoma patients with minimal background fibrosis: a strategy in the era of organ shortage.	Medical College Of Wisconsin, Milwaukee, WI	2012-07-17	2013-01-20	2013-06-01	2013-01-20	9	Annals of Surgical Oncology
2012	COMPUTED TOMOGRAPHY ENHANCEMENT AND PATIENT CHARACTERISTICS AS PREDICTORS OF COMPLICATIONS AFTER PANCREATICODUODENECTOMY	yes	333	3	No	J. C. McAuliffe	Yes						https://www.ncbi.nlm.nih.gov/pubmed/23458275	Computed tomography attenuation and patient characteristics as predictors of complications after pancreaticoduodenectomy.	University Of Alabama At Birmingham, Birmingham, AL	2012-07-13	2012-11-24	2013-09-01	2013-01-10	9	HPB
2012	MULTICENTER RESULTS OF STEREOTACTIC BODY RADIOTHERAPY (SBRT) FOR SECONDARY TUMORS OF THE LIVER	yes	155	3	No	J. Sanabria	Yes						https://www.ncbi.nlm.nih.gov/pmc/articles/PMC4503282/	Multicentre results of stereotactic body radiotherapy for secondary liver tumours	1Department Of Surgery, University Hospitals Case Medical Center, Cleveland, OH	2012-01-30	2012-11-20	2013-11-01	2013-01-14	9	Multicentre results of stereotactic body radiotherapy for secondary liver tumours
2012	ROLE OF LYSOPHOSPHATIDIC ACID IN THE DEVELOPMENT OF HEPATOCELLULAR CARCINOMA	yes	0	12	No	N. J. Skill	Yes						http://www.tandfonline.com/doi/abs/10.3109/07357907.2012.762779?journalCode=icnv20	Lysophosphatidic Acid Aberrancies and Hepatocellular Carcinoma: Studies in the MDR2 Gene Knockout Mouse	Indiana University, Indianapolis, IN				2013-01-30	9	Cancer Investigation
2013	AUTOTRANSPLANTATION OF POSITIVE CULTURE ISLET PRODUCT: IS DIRTY ALWAYS BAD?	no info	35	11	No	C. Johnson	Yes						https://www.ncbi.nlm.nih.gov/pubmed/24308511	Autotransplantation of culture-positive islet product: is dirty always bad?	Medical University Of South Carolina – Department Of Surgery, Charleston, SC, USA	2013-03-10	2013-10-15	2014-07-01	2013-12-06	9	HPB
2013	SERUM IGFBP2 AND MSLN AS DIAGNOSTIC AND PROGNOSTIC BIOMARKERS FOR PANCREATIC ADENOCARCINOMA	yes	208	11	No	R. C. Repko	Yes						https://www.ncbi.nlm.nih.gov/pubmed/24308545	Serum IGFBP2 and MSLN as diagnostic and prognostic biomarkers for pancreatic cancer.	1Department Of Surgery, Salt Lake City, UT, USA	2013-07-18	2013-10-21	2014-07-01	2013-12-06	9	HPB
2013	POSTERIOR SMA FIRST APPROACH FOR RESECTION OF LOCALLY ADVANCED PANCREATIC CANCER	no info	1	14	No	J. Rose	Yes						https://www.ncbi.nlm.nih.gov/pubmed/24370905	Posterior 'superior mesenteric artery first' approach for resection of locally advanced pancreatic cancer.	Virginia Mason Medical Center, Seattle, WA, USA	2013-07-31		2014-06-01	2013-12-27	9	Annals of surgical oncology
2013	TREATMENT SEQUENCING STRATEGY FOR HEPATIC EPITHELIOID HEMANGIOENDOTHELIOMA	yes	50	3	No	R. M. Thomas	Yes						https://www.ncbi.nlm.nih.gov/pmc/articles/PMC4105907/	Treatment sequencing strategy for hepatic epithelioid haemangioendothelioma	1The University Of Texas MD Anderson Cancer Center, Houston, TX, USA	2013-08-08	2013-10-30	2014-07-01	2013-12-06	9	HPB
2011	AMBISPECTIVE COMPARATIVE STUDY OF TWO SURGICAL STRATEGIES FOR HYDATID DISEASE OF THE LIVER	yes	88	3	No	Jose M Ramia	Yes						https://www.ncbi.nlm.nih.gov/pmc/articles/PMC3280400/	Ambispective comparative study of two surgical strategies for liver hydatidosis	Hospital Universitario de Guadalajara, Guadalajara	2011-03-23	2011-11-19	2012-02-14	2012-02-14	10	World Journal of Gastroenterology
2011	VASCULAR SURGERY COLLABORATION DURING PANCREATICODUODENECTOMY WITH VASCULAR RECONSTRUCTION	yes	204	3	No	RS Turley	Yes						https://www.ncbi.nlm.nih.gov/pubmed/22305864	Vascular surgery collaboration during pancreaticoduodenectomy with vascular reconstruction.	1Department of Surgery, Durham, NC; 2Department of Radiology, Durham, NC			2012-07-01	2012-02-04	10	Annals of Vascular surgery
2012	EFFICACY AND COST-BENEFIT ANALYSIS OF MESH REINFORCEMENT OF STAPLED LEFT PANCREATECTOMY: RESULTS OF A RANDOMIZED CONTROLLED TRIAL	yes	100	1	No	K. Idrees	Yes						https://www.ncbi.nlm.nih.gov/pmc/articles/PMC4503287/	Cost benefit analysis of mesh reinforcement of stapled left pancreatectomy	1Department Of Surgery, Washington University, St. Louis, MO;	2012-09-18	2012-12-20	2013-11-01	2013-02-20	10	HPB
2012	IMPACT OF PREOPERATIVE THERAPY ON PATTERNS OF RECURRENCE IN PANCREATIC CANCER	yes	309	3	No	P. Papavasiliou	Yes						https://www.ncbi.nlm.nih.gov/pmc/articles/PMC3892312/	Impact of preoperative therapy on patterns of recurrence in pancreatic cancer	Fox Chase Cancer Center, Philadelphia, PA	2012-08-02	2013-01-06	2014-01-01	2013-02-20	10	HPB
2012	IS DONATION AFTER CARDIAC DEATH DONOR LIVER TRANSPLANTATION STILL COST-EFFECTIVE OR JUST A MEANS OF SHIFTING WAIT-LIST DEATH TO RECIPIENT DEATH?	no info	0	13	No	L. A. Redhage	Yes						https://www.ncbi.nlm.nih.gov/pmc/articles/PMC3572278/	Is liver transplantation using organs donated after cardiac death cost-effective or does it decrease waitlist death by increasing recipient death?	Vanderbilt University Medical Center, Nashville, TN	2012-03-21	2012-05-31	2013-04-01	2013-02-04	10	HPB
2012	NEUTROPHIL TO LYMPHOCYTE RATIO: PREDICTOR OF POOR OUTCOME IN ACUTE PANCREATITIS	no info	146	3	No	A. Suppiah	Yes						https://www.ncbi.nlm.nih.gov/pubmed/23371356	The prognostic value of the neutrophil-lymphocyte ratio (NLR) in acute pancreatitis: identification of an optimal NLR.	The HPB Unit, Leeds, Yorshire, United Kingdom	2012-08-04	2012-12-06	2013-04-01	2013-02-01	10	Journal of Gastrointestinal Surgery
2013	EXTENDED NEOADJUVANT CHEMOTHERAPY FOR BORDERLINE RESECTABLE PANCREATIC CANCER DEMONSTRATES PROMISING POSTOPERATIVE OUTCOMES AND SURVIVAL	no info	57	3	No	J. B. Rose	Yes						https://www.ncbi.nlm.nih.gov/pubmed/24473642	Extended neoadjuvant chemotherapy for borderline resectable pancreatic cancer demonstrates promising postoperative outcomes and survival.	1Virginia Mason Medical Center – Department Of Surgery, Seattle, WA, USA	2013-10-06		2014-05-01	2014-01-29	10	Annals of Surgical oncology
2013	OPERATIVE COMPLICATIONS ASSOCIATED WITH NON-THERAPEUTIC LAPAROTOMY IN PATIENTS WITH UNRESECTABLE PANCREATIC CANCER	yes	56	3	No	P. M. Spanheimer	Yes	Dr. Mezhir - james-mezhir@uiowa.edu		no - invalid			https://www.ncbi.nlm.nih.gov/pubmed/24395080	Complications and survival associated with operative procedures in patients with unresectable pancreatic head adenocarcinoma.	University Of Iowa Hospitals And Clinics, Iowa City, Iowa, USA	2013-10-02	2013-12-17	2014-06-01	2014-01-07	10	journal of surgical oncology
2011	NATIONAL TRENDS IN DISCHARGE DISPOSITION FOLLOWING PANCREATIC RESECTIONS FOR MALIGNANCY	yes	46602	3	No	Bhavin C Shah	Yes						https://www.ncbi.nlm.nih.gov/pmc/articles/PMC3371203/	Discharge disposition after pancreatic resection for malignancy: analysis of national trends	1University of Nebraska Medical Center, Division of Surgical Oncology, Department of Surgery, Omaha, NE	2011-09-23	2011-11-17	2012-03-01		11	HPB
2012	A COMPARISON OF CLINICOPATHOLOGICAL FEATURES AND LONG-TERM SURVIVAL FOR RESECTED PERIAMPULLARY ADENOCARCINOMAS	yes	2574	3	No	J. He	Yes	jhe11@jhmi.edu					https://www.ncbi.nlm.nih.gov/pmc/articles/PMC3892319/	2564 resected periampullary adenocarcinomas at a single institution: trends over three decades	1Johns Hopkins Medical Institutions, Department Of Surgery, Baltimore, MD;	2012-11-02	2013-01-23	2014-01-01	2013-03-08	11	HPB
2013	MEDIAL OPEN TRANSVERSUS ABDOMINIS PLANE (MOTAP) CATHETER ANALGESIA: A SIMPLE, SAFE, EFFECTIVE TECHNIQUE FOLLOWING OPEN LIVER RESECTION	no info	10	14	No	R. Behman	Yes						http://www.sciencedirect.com/science/article/pii/S1072751514001434?via%3Dihub	Medial Open Transversus Abdominal Plane Catheter Analgesia: A Simple, Safe, Effective Technique after Open Liver Resection	Sunnybrook Health Sciences Centre, University Of Toronto, Toronto, ON, Canada	2013-10-23	2013-12-30	2014-05-01	2014-02-24	11	Journal of the American College of Surgeons
2013	FLUOROSCOPY ASSISTED LAPAROSCOPIC CHOLECYSTECTOMY IN A PATIENT WITH A HEARTMATE® II LEFT VENTRICULAR ASSIST DEVICE	no info	1	4	No	D. L. Eck	Yes						http://online.liebertpub.com/doi/abs/10.1089/lap.2013.0460	Laparoscopic Cholecystectomy in Patients with HeartMate II Left Ventricular Assist Devices	Mayo Clinic, Jacksonville, FL, USA			2014-02-01	2013-12-24	11	Journal of Laparoendoscopic & Advanced Surgical Techniques
2013	HEPATIC ISCHEMIC PRECONDITIONING INCREASES PORTAL BLOOD FLOW IN EXPERIMENTAL LIVER ISCHEMIA/REPERFUSION INJURY IN RATS	no info	56	12	No	E. Ramos Figueira	Yes						https://www.ncbi.nlm.nih.gov/pubmed/24463078	Hepatic ischemic preconditioning increases portal vein flow in experimental liver ischemia reperfusion injury.	1Laboratory Of Medical Investigations – LIM37, University Of SAo Paulo School Of Medicine, Sao Paulo, SP, Brazil			2014-02-01		11	Hepatobiliary Pancreat Dis Int.
2011	RESECTION AND RFA IN THE TREATMENT OF HCC	yes	183	3	No	K karabulut	Yes						https://www.ncbi.nlm.nih.gov/pubmed/22038164	Resection and radiofrequency ablation in the treatment of hepatocellular carcinoma: a single-center experience.	1Department of Endocrine Surgery, Endocrinology and Metabolism Institute, Cleveland Clinic, Cleveland, Ohio				2012-04-01	12	Surgical Endoscopy
2012	INCREASING AGE AND DECREASED FUNCTIONAL STATUS ARE INDEPENDENT PREDICTORS OF POSTOPERATIVE COMPLICATIONS AND DEATH FOLLOWING HEPATIC RESECTIONS	yes	5706	3	No	S. G. De La Fuente	Yes						https://www.ncbi.nlm.nih.gov/pubmed/23585324	Functional status determines postoperative outcomes in elderly patients undergoing hepatic resections.	1H. Lee Moffi tt Cancer Center, Tampa, FL;	2012-11-18	2013-02-27	2013-06-01	2013-04-12	12	The Journal of Surgical Oncology
2012	META-ANALYSIS OF PHASE 3 RANDOMIZED TRIALS ASSESSING THE ROLE OF MOLECULAR TARGETED THERAPIES IN THE MANAGEMENT OF ADVANCED PANCREATIC CANCER	yes	2776	10	No	K. M. Eltawil	Yes						https://www.ncbi.nlm.nih.gov/pmc/articles/PMC3371213/	Meta-analysis of Phase III randomized trials of molecular targeted therapies for advanced pancreatic cancer	Department Of Surgery, Dalhousie University, Halifax, Nova Scotia, Canada	2011-12-08	2012-01-05	2012-04-01		12	HPB
2012	TOTAL LAPAROSCOPIC PANCREATICODUODENECTOMY: EARLY SINGLE INSTITUTION EXPERIENCE	no info	4	3	No	A Kamyab	Yes						https://www.ncbi.nlm.nih.gov/pubmed/23925010	Total laparoscopic pancreaticoduodenectomy.	Providence Hospital And Medical Centers, Southfi eld, MI			2013-04-01		12	Journal of the society of laparoendoscopic surgeons
2012	HEPATIC ARTERIAL NODAL METASTASES IN PANCREATIC CANCER: IS THIS THE NODE OF IMPORTANCE?	yes	147	3	No	J. LaFemina	Yes						https://www.ncbi.nlm.nih.gov/pubmed/23588624	Hepatic arterial nodal metastases in pancreatic cancer: is this the node of importance?	Memorial Sloan-Kettering Cancer Center, New York, NY	2012-06-19	2012-10-26	2013-06-01	2013-04-16	12	Journal of gastrointestinal surgery
2012	CONCOMITANT DYSREGULATION OF MIR-151-3P AND MIR-126 CORRELATES WITH IMPROVED SURVIVAL IN RESECTED CHOLANGIOCARCINOMA	yes	32	7	No	M. E. McNally	Yes						https://www.ncbi.nlm.nih.gov/pmc/articles/PMC3608979/	Concomitant dysregulation of microRNAs miR-151-3p and miR-126 correlates with improved survival in resected cholangiocarcinoma	The Ohio State University Medical Center, Columbus, OH	2012-03-29	2012-05-30		2013-04-01	12	HPB
2012	RESECTION VERSUS TRANSPLANT FOR SOLITARY HEPATITIS C-ASSOCIATED HEPATOCELLULAR CARCINOMA: AN INTENTION-TO-TREAT ANALYSIS	yes	131	3	No	B. Shrager	Yes						https://www.ncbi.nlm.nih.gov/pubmed/23036070	Resection or transplant-listing for solitary hepatitis C-associated hepatocellular carcinoma: an intention-to-treat analysis.	Division Of Surgical Oncology, Department Of Surgery, Mount Sinai School Of Medicine, New York, NY	2012-04-20	2012-05-08	2013-02-01	2012-08-30	12	HPB
2012	JAUNDICE, AN IMPORTANT UNRECOGNIZED RISK FACTOR FOR POOR LONG TERM SURVIVAL IN PATIENTS WITH ADENOCARCINOMA OF THE HEAD OF THE PANCREAS	yes	400	3	No	S. M. Strasberg	Yes						https://www.ncbi.nlm.nih.gov/pmc/articles/PMC3921010/	Jaundice: an important, poorly recognized risk factor for diminished survival in patients with adenocarcinoma of the head of the pancreas	Washington University In St Louis And Barnes-Jewish Hospital, St Louis, MO	2012-11-06	2013-01-26	2014-02-01	2013-04-22	12	HPB
2012	CASE SERIES AND LITERATURE REVIEW OF PANCREATIC ACINAR CELL CYSTADENOMA	no info	17	4	No	A. M. Wolf	yes						https://www.ncbi.nlm.nih.gov/pubmed/23605178	Acinar cell cystadenoma of the pancreas: report of three cases and literature review.	1Department Of Surgery, Thomas Jefferson University, Philadelphia, PA	2012-07-23	2013-03-27	07/012013	2013-04-19	12	journal of gastrointestinal surg
2013	PREDICTING GANGRENOUS CHOLECYSTITIS: WHO SHOULD OPERATE?	no info	167	3	No	B. Wu	Yes						https://www.ncbi.nlm.nih.gov/pmc/articles/PMC4159452/	Predicting gangrenous cholecystitis	1Saint Agnes Hospital, Baltimore, MD, USA;	2013-09-11	2014-01-06	2014-09-01	2014-03-17	12	HPB
2013	COMPARED TO A CONVENTIONAL OPEN APPROACH, LAPAROSCOPIC ASSISTED PANCREATICODUODENECTOMY MAY OFFER PATIENTS BETTER PERFORMANCE STATUS AND PHYSICAL HEALTH IN THE FIRST 6 MONTHS AFTER SURGERY	yes	69	2	No	J. A. Graham	Yes						https://www.ncbi.nlm.nih.gov/pubmed/24680859	Laparoscopic-assisted versus open pancreaticoduodenectomy: early favorable physical quality-of-life measures.	Dept. Of Surgery, Georgetown University Hospital, Washington, DC, USA			2014-08-01	2014-03-14	12	Surgery
2013	A NOVEL THERAPEUTIC (SIGMA-2/SMAC CONJUGATE) EFFECTIVELY TARGETS APOPTOSIS IN PANCREAS ADENOCARCINOMA	no info	0	7	No	Y. M. Hashim	Yes	Dr. Hawkins - hawkinsw@wustl.edu					http://ac.els-cdn.com/S1574789114000532/1-s2.0-S1574789114000532-main.pdf?_tid=2bfebaea-551f-11e7-b84e-00000aab0f6c&acdnat=1497897983_4651fb718456bfe2f9e9acb6e1ba9856	Targeted pancreatic cancer therapy with the small molecule drug conjugate SW IV-134	1Medical College Of Wisconsin, Milwaukee, WI, USA	2013-10-18	2014-03-10	2014-07-01	2014-03-26	12	Molecular Oncology
2013	INDICATIONS AND OUTCOMES OF PANCREAS SURGERY AFTER LIVER TRANSPLANTATION	no info	3196	3	No	J. C. Mejia	Yes						http://onlinelibrary.wiley.com/doi/10.1111/ctr.12317/full	Indications and outcomes of pancreatic surgery after liver transplantation	1Division Of Hepatobiliary And Pancreatic Surgery, Pittsburgh, PA, USA		2013-12-30	2014-03-01	2014-03-12	12	Clinical transplantation
2013	MATCHED COMPARISON BETWEEN ROBOTIC AND LAPAROSCOPIC MAJOR LIVER RESECTIONS IN PATIENTS WITH BENIGN AND MALIGNANT LIVER LESIONS	yes	63	3	No	D. C. Sukato	Yes						https://www.ncbi.nlm.nih.gov/pubmed/24045442	Robotic versus laparoscopic hepatectomy: a matched comparison.	1University Of Pittsburgh School Of Medicine, Pittsburgh, PA, USA			2014-03-01		12	Annals of Surgery
2013	IMPROVED MORTALITY IN ACUTE PANCREATITIS ASSOCIATED WITH EARLY PANCREATIC DEBRIDEMENT – ANALYSIS OF 3,617 PATIENTS UTILIZING THE NATIONWIDE INPATIENT SAMPLE	yes	3617	3	No	B. A. Wormer	Yes						https://www.ncbi.nlm.nih.gov/pubmed/24933665	Outcomes of pancreatic debridement in acute pancreatitis: analysis of the nationwide inpatient sample from 1998 to 2010.	Carolinas Medical Center, Charlotte, NC, USA	2013-09-18	2013-11-11	2014-09-01	2014-03-29	12	The American Journal of Surgery
2011	SURGICAL TREATMENT OF NONCOLORECTAL LIVER METASTASES	yes	79	11	No	V Treska	Yes	treska@fnplzen.cz					https://www.ncbi.nlm.nih.gov/pubmed/22251545	Non-colorectal liver metastases: surgical treatment options.	University Hospital, Department of Surgery, Pilsen, NO			2012-01-01		13	Hepatogastroenterology.
2012	SUCCESSFUL ABDOMINAL ORGAN DONATION AFTER BRAIN DEATH IN A PATIENT WITH A BIVENTRICULAR ASSIST DEVICE: EXTENDING EXTENDED CRITERIA	no info	1	4	No	S. G. Carpenter	Yes						http://file.scirp.org/pdf/OJOTS_2013052416555806.pdf	Successful Abdominal Organ Donation after Brain Death in a Patient with a Biventricular Assist Device: Extending Extended Criteria	1Mayo Clinic Arizona, Division Of Transplant Surgery, Phoenix, AZ	2012-12-01	2013-01-12		2013-05-01	13	Open Journal of Organ Transplant Surgery
2012	REDUCING SURGICAL SITE INFECTIONS IN HEPATO-PANCREATOBILIARY SURGERY	no info	895	3	No	E. P. Ceppa	Yes						https://www.ncbi.nlm.nih.gov/pmc/articles/PMC3633041/	Reducing surgical site infections in hepatopancreatobiliary surgery	1Indiana University Medical Center, Indianapolis, IN	2012-08-14	2012-09-20	2013-05-01	2012-11-05	13	HPB
2012	SURGEON SPECIALIZATION AND UTILIZATION AFTER HEPATECTOMY IN ACADEMIC MEDICAL CENTERS	no info	3464	3	No	J. J. Shaw	Yes						https://www.ncbi.nlm.nih.gov/pmc/articles/PMC4570249/	Specialization and utilization after hepatectomy in academic medical centers	University Of Massachusetts Medical School, Worcester, MA			2013-11-01	2013-05-21	13	Journal of Surgical resection
2013	IMPACT OF PERIOPERATIVE BEVACIZUMAB ON SURVIVAL IN PATIENTS WITH RESECTED COLORECTAL LIVER METASTASES: AN ANALYSIS OF LIVERMETSURVEY	yes	501	3	No	Z. Rong	Yes						https://www.ncbi.nlm.nih.gov/pubmed/24641317	Impact of peri-operative bevacizumab on survival in patients with resected colorectal liver metastases: an analysis of the LiverMetSurvey.	1HPB Surgery And Liver Transplantation Unit, Hopital Saint-Luc, Universite De Montreal, Montreal, QC, Canada	2013-03-06	2013-05-21	2014-04-01	2015-12-16	13	HPB
2011	ANALYZE OF THE RISK FACTORS OF DEATH FROM CANCER PROGRESSION WITHIN 1 YEAR AFTER HEPATECTOMY FOR THE PATIENTS WITH HEPATOCELLULAR CARCINOMA (HCC)	yes	522	3	No	T. Kamiyama	Yes						https://www.ncbi.nlm.nih.gov/pmc/articles/PMC3407774/	Analysis of the risk factors for early death due to disease recurrence or progression within 1 year after hepatectomy in patients with hepatocellular carcinoma	1General Surgery, Hokkaido University, Sapporo, Hokkaido				2012-06-14	14	World journal of surgical oncology
2012	CONVERSION TO COMPLETE SURGICAL TREATMENT USING HEPATIC ARTERY INFUSIONAL CHEMOTHERAPY IN PATIENTS WITH UNRESECTABLE LIVER METASTASES FROM COLORECTAL CANCER	yes	373	3	No	J B Ammori	Yes						https://www.ncbi.nlm.nih.gov/pubmed/23771246	Conversion to complete resection and/or ablation using hepatic artery infusional chemotherapy in patients with unresectable liver metastases from colorectal cancer: a decade of experience at a single institution.	1University Hospitals Case Medical Center, Cleveland, OH;	2012-09-22		2013-09-01	2013-06-15	14	Annals of Surgical oncology
2012	IMPACT OF ABERRANT RIGHT HEPATIC ARTERY ON ONCOLOGIC MARGINS AND OUTCOMES AFTER PANCREATICODUODENECTOMY	yes	55	3	No	P. T. Kim	Yes						https://www.ncbi.nlm.nih.gov/pmc/articles/PMC3945845/pdf/hpb0016-0204.pdf	Aberrant right hepatic artery in pancreaticoduodenectomy for adenocarcinoma: impact on resectability and postoperative outcomes	Toronto General Hospital, Toronto, ON, Canada	2012-11-15	2013-03-26	2014-03-01	2013-06-19	14	HPB
2012	OBESITY PORTENDS AN INCREASED MORBIDITY, ABBREVIATED SURVIVAL AND EARLY RECURRENCE FOLLOWING OLT FOR HEPATOCELLULAR CARCINOMA	yes	132	3	No	A. Mathur	Yes						http://onlinelibrary.wiley.com/doi/10.1111/j.1477-2574.2012.00602.x/abstract		1Department Of Surgery, University Of South Florida, Tampa, FL	2012-03-20	2012-09-20		2013-06-10	14	HPB
2013	LIVER RESECTION AFTER DOWNSTAGING CHEMOTHERAPY IN PATIENTS WITH INITIALLY UNRESECTABLE COLORECTAL LIVER METASTASES	no info	31	3	No	N. A. Devaud	Yes						http://www.sciencedirect.com/science/article/pii/S1365182X15315896	Liver resection after chemotherapy and tumour downsizing in patients with initially unresectable colorectal cancer liver metastases	1Toronto General Hospital, University Health Network (UHN), Toronto, ON, Canada	2013-03-25	2013-06-03	2014-05-01	2015-12-16	14	HPB
2013	DEEP SEQUENCING ANALYSIS OF MICROBIAL DNA IN INFECTED NECROTIZING PANCREATITIS	no info	14	11	No	E. M. Hanna	Yes	Dr. McKillop - iain.mckillop@carolinashealthcare.org					https://www.ncbi.nlm.nih.gov/pubmed/24952411	Comparison of culture and molecular techniques for microbial community characterization in infected necrotizing pancreatitis.	1Carolinas Medical Center, Charlotte, NC, USA; 2UNC At Charlotte, Charlotte, NC, USA	2013-12-13	2014-05-01	2014-10-01	2014-05-09	14	Journal of Surgical Research
2013	THE IMPACT OF UNDERLYING VIRAL DISEASE ON OUTCOMES AFTER LIVER RESECTION FOR HEPATOCELLULAR CARCINOMA: THE RESULTS FROM A NORTH AMERICAN CENTRE	yes	255	3	No	J. Lee	Yes						https://www.ncbi.nlm.nih.gov/pubmed/24806113	Impact of viral hepatitis on outcomes after liver resection for hepatocellular carcinoma: results from a north american center.	1University Of Toronto, Department Of General Surgery, Toronto, ON, Canada	2013-09-12	2014-05-08	2014-08-01	2014-05-08	14	Annals of Surgical Oncology
2013	WHEN THE OUTFLOW SLOWS: TECHNICAL AND DIAGNOSTIC CONSIDERATIONS FOR THE HEPATIC VENOUS ANASTAMOSIS IN PEDIATRIC LIVER TRANSPLANTATION	no	134	2	No	J. Sommovilla	Yes						http://onlinelibrary.wiley.com/doi/10.1111/petr.12277/epdf	Hepatic venous outﬂow obstruction inpediatric liver transplantation: Technicalconsiderations in prevention, diagnosis, andmanageme nt	1Washington University, St. Louis, MO, USA		2014-03-25		2014-05-12	14	Pediatric Transplantation
																				#REF!
2011	BEVACIZUMAB DECREASES PORTAL VEIN EMBOLIZATION INDUCED TUMOUR GROWTH	yes	71	11	No	Eve Simoneau	Yes	Dr. Hassanain -- mazen.hassanain@mcgill.ca		yes- yes			https://www.ncbi.nlm.nih.gov/pmc/articles/PMC3384876/	Portal vein embolization stimulates tumour growth in patients with colorectal cancer liver metastases	1McGill University Health Center, Department of Surgery, Section of Transplant and HPB Surgery, Montreal, Quebec	2011-12-15	2012-03-30	2012-07-01		15	HPB
2012	BILE DUCT INVOLVEMENT PORTENDS POOR PROGNOSIS IN RESECTED GALLBLADDER CARCINOMA	yes	69	3	No	R. L. Eil	Yes						https://www.ncbi.nlm.nih.gov/pubmed/24147157	Bile duct involvement portends poor prognosis in resected gallbladder carcinoma.	1Division Of Surgical Oncology, Oregon Health And Sciences University, Portland, OR	2013-06-13	2013-07-23	2013-07-01		15	Journal of Gastrointestinal Cancer
2013	OPTIMAL ABLATION VOLUMES ARE ACHIEVED AT SUB-MAXIMAL POWER SETTINGS IN A 2.45 GHZ MICROWAVE ABLATION SYSTEM	yes	0	12	No	D. J. Niemeyer	Yes						https://www.ncbi.nlm.nih.gov/pubmed/24899579	Optimal ablation volumes are achieved at submaximal power settings in a 2.45-GHz microwave ablation system.	Carolinas Medical Center, Charlotte, NC, USA			2015-02-01	2014-06-03	15	Surgical Innovation
2013	DOES REGIONAL VARIATION IMPACT DECISION MAKING IN THE MANAGEMENT AND PALLIATION OF PANCREATIC HEAD ADENOCARCINOMA?	yes	160	6	No	C. G. Ball	Yes						https://www.ncbi.nlm.nih.gov/pmc/articles/PMC4035408/	Does regional variation impact decision-making in the management and palliation of pancreatic head adenocarcinoma? Results from an international survey	1University Of Calgary, Calgary, Alberta, Canada		2013-06-17	2014-06-01		15	Canada journal of surgery
2013	BLUNT HEPATIC TRAUMA IN THE AGE OF ANGIOEMBOLIZATION: A SINGLE CENTRE EXPERIENCE	no	396	2	No	K. Bertens	Yes						https://www.ncbi.nlm.nih.gov/pubmed/26038170	Non-operative management of blunt hepatic trauma: Does angioembolization have a major impact?	Western University Canada, London, ON Canada	2014-01-11	2014-07-06	2015-02-01	2014-08-05	15	European Journal of Trauma and Emergency Surgery
2013	MICROWAVE ABLATION HAS LOWER LOCAL RECURRENCE RATES THAN RADIOFREQUENCY ABLATION AFTER TREATMENT OF COLORECTAL LIVER METASTASIS. A MATCHED COHORT ANALYSIS	yes	254	2	No	C. Correa-Gallego	Yes						https://www.ncbi.nlm.nih.gov/pmc/articles/PMC4529120/	A Retrospective Comparison of Microwave Ablation vs. Radiofrequency Ablation for Colorectal Cancer Hepatic Metastases	Memorial Sloan-Kettering Cancer Center, New York, NY, USA				2014-06-03	15	Annals of Surgical oncology
2013	TARGETING BETA-CATENIN SIGNALING PATHWAY IN LIVER CANCER STEM CELLS AND IN HCC CELL LINES WITH FH 535	no info	0	7	No	R. Gedaly	Yes	rgeda2@uky.edu					http://journals.plos.org/plosone/article?id=10.1371/journal.pone.0099272	Targeting the Wnt/β-Catenin Signaling Pathway in Liver Cancer Stem Cells and Hepatocellular Carcinoma Cell Lines with FH535	1Department Of Surgery, University Of Kentucky, Lexington, KY, USA	2013-10-30	2014-05-12		2014-06-18	15	PLOS one
2013	MULTI-INSTITUTION ANALYSIS OF SURVIVAL AFTER HEPATECTOMY FOR FIBROLAMELLAR CARCINOMA	yes	35	3	No	R. T. Groeschl	Yes						http://onlinelibrary.wiley.com/doi/10.1002/jso.23658/abstract	Multi-institutional analysis of recurrence and survival after hepatectomy for fibrolamellar carcinoma	1Medical College Of Wisconsin, Milwaukee, WI, USA	2014-03-06	2014-04-24	2014-09-15	2014-05-21	15	Journal of surgical oncology
2011	IMPROVED PANCREATIC FISTULA RATE AFTER LAPAROSCOPIC DISTAL PANCREATECTOMY USING SALINECOUPLED RADIOFREQUENCY ABLATION FOR PARENCHYMAL DIVISION	no info	21	3	No	Jack W Rostas	Yes						https://www.ncbi.nlm.nih.gov/pmc/articles/PMC3406354/	Improved rate of pancreatic fistula after distal pancreatectomy: parenchymal division with the use of saline-coupled radiofrequency ablation	1University of South Alabama Department of Surgery, Mobile, AL;	2012-03-12	2012-05-04	2012-08-01		16	HPB
2012	EVALUATION OF A NOVEL BIOCERAMIC DRUG DELIVERY SYSTEM FOR TREATING HEPATOCELLULAR CARCINOMA (HCC) IN VIVO	no info	0	7	No	J. H. Swet	Yes						https://www.ncbi.nlm.nih.gov/pubmed/23913418	A silica-calcium-phosphate nanocomposite drug delivery system for the treatment of hepatocellular carcinoma: in vivo study.	1Carolinas Medical Center, Charlotte, NC	2013-03-21	2013-06-06	2014-01-01	2013-08-01	16	journal of biomedical materials research
2013	HEMOSTATIC EFFICACY OF LATEST GENERATION FIBRIN SEALANT AFTER HEPATIC RESECTION; A RANDOMIZED CONTROLLED CLINICAL STUDY	yes	35	1	No	H. Bektas	Yes						https://www.ncbi.nlm.nih.gov/pubmed/25037462	Hemostatic efficacy of latest-generation fibrin sealant after hepatic resection: a randomized controlled clinical study.	1Medizinische Hochschule Hannover, Klinik F. Allgemein-, Viszeral- U. Transplantationschirurgie, Hannover, Niedersachsen Germany	2013-08-22	2014-07-09	2014-10-01	2014-07-19	16	Langenbeck's Archives of Surgery
2013	CHEMOEMBOLIZATION OUTCOMES FOR HEPATOCELLULAR CARCINOMA IN CIRRHOTIC PATIENTS WITH COMPROMISED LIVER FUNCTION	yes	190	3	No	D. P. Dorn	Yes						https://www.ncbi.nlm.nih.gov/pubmed/25072067	Chemoembolization outcomes for hepatocellular carcinoma in cirrhotic patients with compromised liver function.	University Of Alabama At Birmingham, Birmingham, AL, USA	2013-05-22	2013-10-01	2014-07-01	2015-12-16	16	HPB
2013	LAPAROSCOPIC TRANSGASTRIC DEBRIDEMENT OF WALLED-OFF PANCREATIC NECROSIS: A NEW THERAPEUTIC OPTION FOR PATIENTS WITH NECROTIZING PANCREATITIS	no info	8	3	No	S. Kulkarni	Yes						https://www.ncbi.nlm.nih.gov/pubmed/25055889	Surgical transgastric debridement of walled off pancreatic necrosis: an option for patients with necrotizing pancreatitis.	Keck School Of Medicine, University Of Southern California, Los Angeles, Los Angeles, CA, USA	2014-02-25	2014-06-22	2015-03-01	2014-07-24	16	Surgical Endoscopy
2011	POSTOPERATIVE MORTALITY FOLLOWING HEPATECTOMY FOR METASTATIC DISEASE IN THE ELDERLY	yes	4026	3	No	Avo Artinyan	Yes						https://www.ncbi.nlm.nih.gov/pmc/articles/PMC3521916/	Postoperative mortality and need for transitional care following liver resection for metastatic disease in elderly patients: a population-level analysis of 4026 patients	Baylor College of Medicine, Houston, TX	2012-06-01	2012-08-23		2012-09-28	17	HPB
2011	ANATOMIC LIVER RESECTIONS FOR THE TREATMENT OF HEPATOLITHIASIS	no info	50	3	No	E. O. Figueroa	Yes	Dr. Jarufe - njarufe@med.puc.cl					https://www.ncbi.nlm.nih.gov/pmc/articles/PMC3461386/	Anatomic hepatectomy as a definitive treatment for hepatolithiasis: a cohort study	Pontifi cia Universidad Catolica de Chile, Santiago, Ragion Metropolitana				2012-09-01	17	HPB
2012	LONG TERM SURVIVAL IN PATIENTS WITH METASTATIC GASTROINTESTINAL STROMAL TUMORS TO THE LIVER AND OTHER LOCATIONS	no	193	3	No	S. G. De La Fuente	Yes	0					https://www.ncbi.nlm.nih.gov/pubmed/23458233	A comparison between patients with gastrointestinal stromal tumours diagnosed with isolated liver metastases and liver metastases plus sarcomatosis.	H. Lee Moffi tt Cancer Center, Tampa, FL	2012-04-03	2012-10-17	2013-09-01	2012-12-27	17	HPB
2012	READMISSION FOLLOWING PANCREATECTOMY: WHAT CAN WE DO BETTER?	no info	121	3	No	S. Gondek	Yes						http://www.sciencedirect.com/science/article/pii/S1365182X15314593	Readmission following pancreatectomy: what can be improved?	1Beth Israel Deaconess Medical Center/Harvard Medical School, Boston, MA	2012-08-14	2012-10-28	2013-09-01	2015-12-15	17	HPB
2012	PREOPERATIVE IMAGING FINDINGS CONCERNING FOR GALLBLADDER MALIGNANCY: IS INITIAL LAPAROSCOPIC APPROACH TO RESECTION REASONABLE?	no info	4474	3	No	G. Wright	Yes						https://www.ncbi.nlm.nih.gov/pmc/articles/PMC3866064/	Selective Laparoscopic Approach in Suspected Gallbladder Malignancy	1Grand Rapids Medical Education Partners/Michigan State Univ General Surgery Residency Program, Grand Rapids, MI			2013-10-01		18	Journal of the Society of Laparoendoscopic Surgeons
2013	LAPAROSCOPIC MICROWAVE ABLATION OF LIVER TUMORS USING 3D GUIDANCE SYSTEM IN HUMANS	no info	10	9	No	D. Sindram	Yes						https://www.ncbi.nlm.nih.gov/pmc/articles/PMC4266445/	Laparoscopic microwave ablation of human liver tumours using a novel three-dimensional magnetic guidance system	Carolinas Medical Center, Charlotte, NC, USA	2013-12-15	2014-06-04	2015-01-01	2014-09-17	18	HPB
2011	EFFECTS OF SORAFENIB ON THE EARLY LIVER REPAIR RESPONSE FOLLOWING PARTIAL HEPATECTOMY IN MICE	no	0	12	No	P. C. Kurniali	Yes						https://www.ncbi.nlm.nih.gov/pmc/articles/PMC3419806/	The Effects of Sorafenib on Liver Regeneration in a Model of Partial Hepatectomy	1Roger Williams Medical Center , Providence, RI			2012-11-01	2012-03-29	19	Journal of Surgical Research
2012	RETROSPECTIVE COMPARISON OF MINIMALLY INVASIVE VERSUS OPEN PANCREATICODUODENECTOMY FOR PERIAMPULLARY NEOPLASMS	yes	56	3	No	P. Q. Bao	Yes						https://www.ncbi.nlm.nih.gov/pubmed/24234245	Retrospective comparison of robot-assisted minimally invasive versus open pancreaticoduodenectomy for periampullary neoplasms.	Stony Brook University Medical Center, Stony Brook, NY	2013-08-14	2013-10-31	2014-04-01	2013-11-15	19	Journal of Gastrointestinal Surgery
2012	SAFETY AND EARLY EFFICACY OF IRREVERSIBLE ELECTROPORATION FOR HEPATIC TUMORS IN PROXIMITY TO VITAL STRUCTURES	no info	150	11	No	R. M. Cannon	Yes	rmcann03@louisville.edu		no - invalid email			https://www.ncbi.nlm.nih.gov/pubmed/23090720	Safety and early efficacy of irreversible electroporation for hepatic tumors in proximity to vital structures.	University of Louisville, Department of Surgery, Division of Surgical Oncology, Louisvill, KY	2012-06-04	2012-10-01	2013-04-13	2012-10-22	19	Journal of Surgical Oncology
2012	RECURRENCE, SALVAGE, AND SURVIVAL AFTER TWO-STAGE HEPATECTOMY FOR COLORECTAL LIVER METASTASES	no info	40	3	No	K. Cardona	Yes	Dr. D'Angelica - dangelim@mskcc.org		YES - yes			https://www.ncbi.nlm.nih.gov/pubmed/24242675	Treatment of extensive metastatic colorectal cancer to the liver with systemic and hepatic arterial infusion chemotherapy and two-stage hepatic resection: the role of salvage therapy for recurrent disease.	Memorial Sloan-Kettering Cancer Center, New York, NY			2014-03-01	2013-11-18	19	annals of surgical oncology
2012	CLINICAL EXPERIENCE WITH A 3-D IMAGE-GUIDANCE SYSTEM IN LAPAROSCOPIC LIVER RADIOFREQUENCY ABLATION	no info	0	9	No	C. W. Hammill	Yes						https://www.ncbi.nlm.nih.gov/pmc/articles/PMC4105303/	Evaluation of a Minimally Invasive Image-Guided Surgery System for Hepatic Ablation Procedures	1Liver And Pancreas Surgery Program, Portland, OR			2014-08-01	2013-11-06	19	surgical innovations
2012	ROBOTIC-ASSISTED DISTAL PANCREATECTOMY IS SAFE AND FEASIBLE	no info	40	3	No	P. Suman	Yes						https://www.ncbi.nlm.nih.gov/pmc/articles/PMC3866069/	Robotic Distal Pancreatectomy	1The Daniel And Gloria Blumenthal Cancer Center, The Valley Hospital, Paramus, NJ			2013-11-01		19	Journal of the Society of laparoendoscopic surgeons
2013	HEPATIC HEMANGIOMAS: HOW MUCH GROWTH IS NORMAL OVER LONG-TERM FOLLOW-UP?	yes	164	3	No	H. Y. Hasan	Yes						https://www.ncbi.nlm.nih.gov/pubmed/25321079	Assessing normal growth of hepatic hemangiomas during long-term follow-up.	1Medical College Of Wisconsin, Milwaukee, WI, USA			2014-12-01	2014-10-15	19	JAMA Surgery
2012	EVALUATION OF SERUM MESOTHELIN AS A DIAGNOSTIC AND PROGNOSTIC BIOMARKER FOR PANCREATIC ADENOCARCINOMA	yes	211	11	No	Z. W. Kendrick	yes	Dr. Firpo - matt.firpo@hsc.utah.edu					https://www.ncbi.nlm.nih.gov/pmc/articles/PMC4105906/	Serum IGFBP2 and MSLN as diagnostic and prognostic biomarkers for pancreatic cancer	1Department Of Surgery, Salt Lake City, UT	2013-07-18	2013-10-20	2014-07-01	2013-12-06	20	HPB
2011	OUTCOMES OF MINIMALLY-INVASIVE DISTAL PANCREATECTOMY: SINGLE INSTITUTION COMPARISON OF ROBOTIC AND LAPAROSCOPIC METHODS	yes	20	3	No	M. Daouadi	Yes						https://www.ncbi.nlm.nih.gov/pubmed/22868357	Robot-assisted minimally invasive distal pancreatectomy is superior to the laparoscopic technique.	University of Pittsburgh Medical Center, Division of Surgical Oncology, Pittsburgh, PA			2013-01-01	2013-01-01	21	Annals of Surgery
2011	OUTCOMES AFTER TIPS: A BRIDGE TO NOWHERE	yes	256	3	No	PG Toomey	Yes						https://www.ncbi.nlm.nih.gov/pubmed/23375760	Outcomes after transjugular intrahepatic portosystemic stent shunt: a "bridge" to nowhere.	University of South Florida and Tampa General Hospital Digestive Disorders Center, Tampa, FL	2012-03-07	2012-04-03	2013-04-01	2013-01-30	21	The American Journal of Surgery
2011	LAPAROSCOPIC LIVER RESECTION FOR HEPATOCELLULAR CARCINOMA; A SINGLE CENTER EXPERIENCE	no info	56	3	No	S Yoon	Yes	n/a					https://www.ncbi.nlm.nih.gov/pubmed/23107909	Laparoscopic liver resection for hepatocellular carcinoma: a three-year study of 57 Patients.	Asan Medical Center, Ulsan University, Seoul			2013-01-01	2013-01-01	21	Hepatogastroenterology
2012	ARE HEPATOCELLULAR CARCINOMA PATIENTS MORE LIKELY TO RECEIVE LIVER RESECTION IN REGIONS WITH LONGER TRANSPLANT WAIT-TIMES?	yes	4516	3	No	J. Anderson	Yes	0					http://www.sciencedirect.com/science/article/pii/S0041134513011263	Are Hepatocellular Carcinoma Patients More Likely to Receive Liver Resection in Regions with Longer Transplant Wait Times?	University Of California, San Diego, San Diego, CA			2014-01-01	2014-02-05	21	Transplantation Proceedings
2013	PERCUTANEOUS TRANSHEPATIC BILIARY DRAINAGE: FIRST CHOICE OR SECOND CHOICE FOR PREOPERATIVE BILIARY DRAINAGE OF HILAR CHOLANGIOCARCINOMA?	yes	163	2	No	J. K. Wiggers	yes	j.k.wiggers@amc.nl		YES -- accepted			http://www.annsurgoncol.org/journals/abstract.html?v=22&j=10434&i=3&a=4676_10.1245_s10434-015-4676-z&doi=	Percutaneous Preoperative Biliary Drainage for Resectable Perihilar Cholangiocarcinoma: No Association with Survival and No Increase in Seeding Metastases	Academic Medical Centre, Amsterdam, Noord-Holland, Netherlands			2015-12-01		21	Annals of surgical oncology
2011	REGIONAL TUMOUR DIFFERENCES IN PROSTAGLANDIN E2 LEVELS MAY PROMOTE DEVELOPMENT OF COLORECTAL LIVER METASTASES BY PROMOTING EPITHELIALMESENCHYMAL TRANSITION	yes	0	7	No	A L Young	Yes						https://bmccancer.biomedcentral.com/articles/10.1186/1471-2407-13-92	Regional differences in prostaglandin E2 metabolism in human colorectal cancer liver metastases	1St James’s University Hospital, Leeds, Yorkshire	2012-10-29	2013-02-19	2011-07-01	2013-02-26	22	BMC Cancer
2012	LAPAROSCOPIC VS. OPEN LEFT LATERAL SECTIONECTOMY AND RIGHT HEPATECTOMY: A COSTEFFECTIVENESS ANALYSIS FOR MINOR AND MAJOR HEPATECTOMY	yes	153	3	No	M. Abu Hilal	Yes	mohammed.abuhilal@uhs.nhs.uk					https://www.ncbi.nlm.nih.gov/pubmed/23355170	Assessment of the financial implications for laparoscopic liver surgery: a single-centre UK cost analysis for minor and major hepatectomy.	Southampton University Hospital Trust, Southampton, Hampshire, United Kingdom	2012-08-13	2012-12-14	2013-07-01	2013-01-26	22	Surgical Endoscopy
2011	PRESENCE OF EXTRA-HEPATIC DISEASE SHOULD NOT PRECLUDE TRANSARTERIAL CHEMOEMBOLIZATION FOR METASTATIC CARCINOID	yes	198	3	No	David Arrese	Yes	0					https://www.ncbi.nlm.nih.gov/pubmed/23456380	Extrahepatic Disease Should Not Preclude Transarterial Chemoembolization for Metastatic Neuroendocrine Carcinoma	Department of Surgery, Riverside Methodist Hospital, Columbus, OH	2012-04-06	2013-03-02		2013-03-02	23	Annals of Surgical Oncology
2012	A DECADE OF MIMINALLY INVASIVE LIVER RESECTION (MILR) IN 432 PATIENTS AT A HIGH VOLUME LIVER CANCER CENTER	no info	432	3	No	J. S. Cardinal	Yes	Dr. Tsung - tsunga@upmc.edu					https://www.ncbi.nlm.nih.gov/pubmed/23053353	Laparoscopic major hepatectomy: pure laparoscopic approach versus hand-assisted technique.	University of Pittsburgh Medical Center Department of Surgery, Pittsburgh, PA			2013-02-01	2013-02-01	23	Journal of Hepato-biliary-pancreatic Sciences
2012	CHEST CT AND POSITRON EMISSION TOMOGRAPHY (PET) IN PATIENTS WITH PANCREATIC ADENOCARCINOMA: ADDED INFORMATION OR JUST ADDED COST?	no info	247	3	No	S. G. Pappas	Yes						https://www.ncbi.nlm.nih.gov/pmc/articles/PMC3892317/	Staging chest computed tomography and positron emission tomography in patients with pancreatic adenocarcinoma: utility or futility?	1Medical College Of Wisconsin, Milwaukee, WI	2012-09-17	2013-01-18	2014-01-01	2013-03-15	23	HPB
2012	COMPARISON OF STANDARD DISTAL PANCREATECTOMY AND SPLENECTOMY TO RADICAL ANTEGRADE MODULAR PANCREATOSPLENECTOMY	yes	25	3	No	P. Trottman	Yes						https://www.ncbi.nlm.nih.gov/pubmed/24666872	Comparison of standard distal pancreatectomy and splenectomy with radical antegrade modular pancreatosplenectomy.	Wake Forest University School Of Medicine, Department Of General Surgery, Winston Salem, NC			2014-03-01		23	American journal of surgery
2013	THE EFFECT OF INTRA-OPERATIVE STENTING ON BILIARY COMPLICATIONS FOLLOWING ORTHOTOPIC LIVER TRANSPLANTATION	yes	434	3	Yes	A. K. Mathur	Yes						https://www.ncbi.nlm.nih.gov/pubmed/25604635	Internal biliary stenting during orthotopic liver transplantation: anastomotic complications, post-transplant biliary interventions, and survival.	University Of Michigan, Ann Arbor, MI, USA		2015-01-15	2015-04-01	2015-02-23	23	Clinical Transplantation
2011	THE SCIENCE OF PAINLESS JAUNDICE: ELUCIDATING THE MECHANISM OF BILE ACID INDUCED ANALGESIA	no info	0	12	No	E Kwon	Yes	n/a					https://www.ncbi.nlm.nih.gov/pubmed/?term=kwon+e%5Bauthor%5D+AND+painless+jaundice	The TGR5 receptor mediates bile acid-induced itch and analgesia.	University of California, San Francisco, San Francisco, CA	2012-04-30	2013-01-17	2013-04-01	2013-03-25	24	Journal of Clinical Investigation
2012	LAPAROSCOPIC TRANSGASTRIC ENDOLUMENAL CYSTGASTROSTOMY AND PANCREATIC DEBRIDEMENT	no info	10	3	No	K. A. Simo	Yes						https://www.ncbi.nlm.nih.gov/pubmed/24671349	Laparoscopic transgastric endolumenal cystogastrostomy and pancreatic debridement.	Section Of Hepatobiliary And Pancreatic Surgery, Dept. General Surgery, Carolinas Medical Center, Charlotte, NC	2013-05-09	2013-11-05	2014-05-01	2014-03-27	24	Surgical Endoscopy
2012	COMBINED PANCREATICODUODENECTOMY AND COLON RESECTION FOR LOCALLY ADVANCED TUMORS OF THE PANCREATIC HEAD: ANALYSIS OF POST-OPERATIVE MORBIDITY AND MORTALITY	yes	23	4	No	S. J. Temple	Yes						https://www.ncbi.nlm.nih.gov/pmc/articles/PMC4159451/	Combined pancreaticoduodenectomy and colon resection for locally advanced peri-ampullary tumours: analysis of peri-operative morbidity and mortality	Department Of Surgery, Toronto, ON	2014-01-22	2014-03-05	2014-09-10	2014-04-18	24	HPB
2013	LIVER RESECTION FOR NON-COLORECTAL, NON-NEUROENDOCRINE, NON-SARCOMA METASTASES: A MULTICENTER STUDY	no	52	3	No	J. Hawel	Yes						https://www.ncbi.nlm.nih.gov/pubmed/25811923	Liver resection for non-colorectal, non-carcinoid, non-sarcoma metastases: a multicenter study.	1University Of Ottawa, Ottawa, ON, Canada;	2014-11-11	2015-01-23		2015-03-26	24	plos one
2011	ROBOTIC-ASSISTED MINIMALLYINVASIVE CENTRAL PANCREATECTOMY: VIDEO AND OUTCOMES	no info	8	5	No	H. T. Huss	Yes						https://link.springer.com/article/10.1007/s11605-012-2137-6	Robotic-Assisted Minimally Invasive Central Pancreatectomy: Technique and Outcomes	University of Pittsburgh Medical Center, Pittsburgh, PA				2013-05-01	25	Journal of Gastrointestinal Surgery
2012	RESIDUAL DISEASE (RD) PREDICTS OUTCOME AFTER DEFINITIVE RESECTION FOR INCIDENTAL GALLBLADDER CANCER (IGBC)	yes	253	3	No	J. M. Butte	Yes						https://www.ncbi.nlm.nih.gov/pmc/articles/PMC4143454/	Residual Disease Predicts Outcomes after Definitive Resection for Incidental Gallbladder Cancer	1Department Of Surgery, Memorial Sloan-Kettering Cancer Center, New York, NY			2014-09-01	2014-05-16	25	American College of Surgery
2012	ISOLATED HEPATIC PERFUSION (IHP) FOR ISOLATED UNRESECTABLE COLORECTAL LIVER METASTASES (CRCLM)	yes	90	3	No	D. Magge	Yes						https://www.ncbi.nlm.nih.gov/pubmed/24169176	Outcome analysis of a decade-long experience of isolated hepatic perfusion for unresectable liver metastases at a single institution.	1University Of Pittsburgh Medical Center, Pittsburgh, PA			2014-05-01		25	Annals of Surgery
2012	LYMPHOEPITHELIAL CYSTS OF THE PANCREAS: A MANAGEMENT DILEMMA	no info	6	3	No	J. Martin	Yes						https://www.ncbi.nlm.nih.gov/pubmed/25308365	Lymphoepithelial cysts of the pancreas:a management dilemma.	1Department Of General Surgery, Section Of Surgical Oncology/HPB, Cleveland, Ohio		2014-05-29	2014-10-01		25	Hepatobiliary & Pancreatic Diseases International
2011	THE ROLE OF THE RENINANGIOTENSIN SYSTEM ON MACROPHAGE PLASTICITY IN COLORECTAL LIVER METASTASES	no info	0	12	No	S wen	Yes						https://www.ncbi.nlm.nih.gov/pmc/articles/PMC3841211/	The renin angiotensin system regulates Kupffer cells in colorectal liver metastases	The Department of Surgery, Austin Health, The University of Melbourne, Heidelberg, VIC	2013-03-28	5/19/0013	2013-08-01	2013-06-17	26	Cancer Biology & Therapy
2012	TRIPTOLIDE-INDUCED CELL DEATH IN HEPATOCELLULAR CARCINOMA	no info	0	7	No	T. C. Krosch	Yes						https://www.ncbi.nlm.nih.gov/pubmed/24953273	Sorafenib and triptolide as combination therapy for hepatocellular carcinoma.	University Of Minnesota Department Of Surgery, Minneapolis, MN		2014-04-28	2014-08-01	2014-06-19	26	Surgery
2011	HEALTH-RELATED QUALITY OF LIFE CHANGES FOLLOWING MAJOR LIVER RESECTION	yes	41	6	No	R. E. Brown	Yes	Dr. McMasters - mcmasters@louisville.edu					https://www.ncbi.nlm.nih.gov/pubmed/?term=HEALTH-RELATED+QUALITY+OF+LIFE+CHANGES+FOLLOWING+MAJOR+LIVER+RESECTION	Health-related quality of life changes following major and minor hepatic resection: the impact of complications and postoperative anemia.	University of Louisville, Louisville, KY	2012-10-12	2012-12-07	2013-10-01	2013-07-12	27	The American Journal of Surgery
2013	PROGRESSION AND MANAGEMENT OF ADVANCED DUODENAL POLYPOSIS IN PATIENTS WITH FAMILIAL ADENOMATOUS POLYPOSIS	no info	94	3	No	Pablo Serrano	Yes		35				https://www.ncbi.nlm.nih.gov/pubmed/24950262	Progression and Management of Duodenal Neoplasia in Familial Adenomatous Polyposis: A Cohort Study.	University Of Toronto, Toronto, ON, Canada			2015-06-01		27	Annals of Surgery
2011	FACTORS PREDICTIVE OF OUTCOMES FROM CAUDATE LOBE RESECTION	yes	31	11	No	R. W. Farmer	Yes						https://www.ncbi.nlm.nih.gov/pubmed/24010947	Caudate lobe resections: a single-center experience and evaluation of factors predictive of outcomes.	Division of Surgical Oncology, Louisville, KY				2013-09-01	29	WORLD JOURNAL OF SURGICAL ONCOLOGY
2012	HEPATIC RESECTION OFFERS SIMILAR OVERALL SURVIVAL TO TRANSPLANTATION FOR HEPATOCELLULAR CARCINOMA	yes	188	3	No	T. M. earl	Yes	Dr. Billingsley - billingk@ohsu.edu					https://www.ncbi.nlm.nih.gov/pubmed/23943108	Hepatocellular carcinoma: resection versus transplantation.	Oregon Health and Science University, Portland, OR			2013-08-13	2013-08-13	29	Seminars in Liver Disease
2013	COMPARISON OF TECHNIQUES FOR VOLUMETRIC ANALYSIS OF THE FUTURE LIVER REMNANT: IMPLICATIONS FOR MAJOR HEPATIC RESECTIONS	yes	54	2	No	G. Martel	Yes						https://www.ncbi.nlm.nih.gov/pubmed/26373675	Comparison of techniques for volumetric analysis of the future liver remnant: implications for major hepatic resections.	HPB Surgery And Liver Transplantation Unit, Hopital Saint-Luc, Universite De Montreal, Montreal, QC Canada	2014-12-22	2015-06-22	2015-12-01	2015-09-16	30	HPB
2011	OUTCOMES OF ROBOTIC-ASSISSTED PANCREATIC RESECTION FOR PANCREATIC ADENOCARCINOMA: A SINGLE-INSTITUTION REVIEW	yes	21	3	No	I. W. Nasr	Yes	n/a					https://www.ncbi.nlm.nih.gov/pmc/articles/PMC4619895/	250 Robotic Pancreatic Resections: Safety and Feasibility	University of Pittsburgh Medical Center Dept of Surgery, Pittsburgh, PA			2013-10-01	2013-10-01	31	Annals of Surgery
2011	COMPLETE RESOLUTION OF A MALIGNANT BILIARY STRICTURE USING COMBINED NEOADJUVANT CHEMORADIATION AND BRACHYTHERAPY BOOST PRIOR TO ORTHOTOPIC LIVER TRANSPLANTATION	no info	1	4	No	Jason J Schwartz	Yes						https://www.scitechnol.com/complete-resolution-of-a-malignant-biliary-stricture-using-combined-neoadjuvant-chemoradiation-and-brachytherapy-boost-prior-to-orthotopic-liver-transplantation-n0x5.php?article_id=1819	Complete Resolution of a Malignant Biliary Stricture Using Combined Neoadjuvant Chemoradiation and Brachytherapy Boost Prior to Orthotopic Liver Transplantation	University of Utah, Salt Lake City, Utah	2013-06-13	2013-11-20		2013-11-25	31	journal of liver: disease and transplantation
2012	QUALITY OF LIFE ASSESSMENT OF LOCAL PANCREATIC HEAD RESECTION FOR CHRONIC PANCREATITIS	no info	44	3	No	T. D. Fischer	Yes						http://search.proquest.com/openview/f85f7e6d591a3c043e52c55c5aa7c4e8/1.pdf?pq-origsite=gscholar&cbl=1216386	Local pancreatic head resection: the search for optimal indications through quality of life assessments	Department Of Surgery, Gainesville, FL	2014-10-07		2015-09-01	2014-12-01	32	The American Journal of Surgery
2012	SCARLESS HEPATECTOMY – NATURAL ORIFICE SPECIMEN EXTRACTION AFTER LEFT LATERAL SECTIONECTOMY	no info	0	14	No	I. R. Orso	Yes						https://www.ncbi.nlm.nih.gov/pmc/articles/PMC4743225/	Scarless hepatectomy: natural orifice specimen extraction after left lateral sectionectomy	1Gastroclca Cascavel, Cascavel, Parana, Brazil	2014-06-24	2014-09-16	2014-12-01		32	ARQUIVOS BRASILEIROS DE CIRURGIA DIGESTIVA
2011	A SINGLE CENTER COMPARISON OF OUTCOMES IN HEPATIC RESECTIONS USING TWO DIFFERENT DEVICES FOR PARENCHYMAL DIVISION	yes	47	3	No	Adam S. Bodzin	Yes						https://www.ncbi.nlm.nih.gov/pubmed/24560847	Liver resection using cavitron ultrasonic surgical aspirator (CUSA) versus harmonic scalpel: a retrospective cohort study.	1Thomas Jefferson University Hospital, Division of Transplantation, Philadelphia, PA	2013-11-05	2014-02-14		2014-02-18	34	International Journal of Surgery
2013	AMPULLARY PANCREATIC TYPE CANCER METASTATIC TO THE ANAL CANAL: A UNIQUE CASE	no info	1	4	No	F. Ejtehadi	Yes	farshid.e@doctors.org.uk					https://www.ncbi.nlm.nih.gov/pubmed/?term=ejtehadi+f%5Bauthor%5D+AND+anal	Colonic and anal metastases from pancreato-biliary malignancies.	Department Of HPB And Transplant Surgery, Cambridge, Cambridgeshire UK	2013-10-28	2014-01-20	2014-04-07	2014-04-07	37	World Journal of Gastroenterology
2011	REPEAT CURATIVE INTENT SURGERY FOR COLORECTAL LIVER METASTASIS – AGGRESSIVE MULTI-DISCIPLINARY MANAGEMENT ALLOWS EXCELLENT OUTCOMES	no info	125	3	No	Kulaylat AN	yes	akulaylat@hmc.psu.edu					https://www.ncbi.nlm.nih.gov/pubmed/25146500	Overall survival by pattern of recurrence following curative intent surgery for colorectal liver metastasis.	Section of Surgical Oncology, Department of Surgery, Penn State College of Medicine, Hershey, PA	2014-05-28	2014-07-27		2014-08-21	40	Journal of Surgical Oncology
2013	FIVE AND TEN YEAR OVERALL SURVIVAL IN PATIENTS UNDERGOING RADIOFREQUENCY ABLATION FOR PRIMARY AND METASTATIC HEPATIC MALIGNANCIES	no info	216	3	No	B. J. Golas	Yes						https://www.ncbi.nlm.nih.gov/pmc/articles/PMC5011083/pdf/main.pdf	Longterm survival outcomes of patients undergoing treatment with radiofrequency ablation for hepatocellular carcinoma and metastatic colorectal cancer liver tumors	UPMC Liver Cancer Center, University Of Pittsburgh, Pittsburgh, PA, USA	2016-02-21	2016-06-11	2016-09-01	2016-07-09	40	HPB
2011	THE MCGILL BRISBANE PRE OPERATIVE CLINICAL SCORE IS A BETTER PREDICTOR OF RESECTABILITY AT PANCREATICODUODENECTOMY THAN IMAGING	no info	84	3	No	Mohammed Jamal	Yes						https://www.ncbi.nlm.nih.gov/pmc/articles/PMC4161807/	McGill Brisbane Symptom Score for patients with resectable pancreatic head adenocarcinoma	1McGill University Health Center, Montreal, Quebec				2014-09-01	41	World Journal of Gastroenterology
2013	CHOLECYSTECTOMY IN OLDER PATIENTS: WHAT ARE THE RISKS?	yes	2573	3	No	H. Ferdosi	yes	Dr. cunningham - Steven.Cunningham@stagnes.org		YES - yes			http://www.sciencedirect.com/science/article/pii/S1743919117300493	Age-related differences pre-, intra-, and postcholecystectomy: A retrospective cohort study of 6,868 patients ☆	1Saint Agnes Hospital, Baltimore, MD, USA	2016-11-23	2017-01-12		2017-01-16	41	International journal of surgery
2012	INTERCOSTAL AND TRANS-THORACIC TROCARS FACILITATE LAPAROSCOPIC RESECTION OF HIGH POSTERIOR LESIONS OF THE LIVER	no info	0	14	No	N. O'Rourke	Yes	orourke.nick@gmail.com					https://www.ncbi.nlm.nih.gov/pubmed/25250870	Intercostal and transthoracic trocars enable easier laparoscopic resection of dome liver lesions.	Royal Brisbane Hospital, Brisbane, Australia	2014-02-25	2014-08-10	2015-04-01	2014-09-23	42	HPB
2013	OUTCOME DATA FROM MUTATIONAL PROFILING OF PANCREATIC CYST FLUIDS	no info	121	3	No	M. J. Lybik	Yes	n/a					https://www.ncbi.nlm.nih.gov/pubmed/25314329	Integrated molecular pathology accurately determines the malignant potential of pancreatic cysts.	Northside Gastroenterology Endoscopy Center, Indianapolis, IN, USA	2014-03-26	2014-08-28	2015-02-01	2014-10-14	43	Endoscopy
2012	POSTOPERATIVE VENOUS THROMBOEMBOLISM FOLLOWING HEPATECTOMY: A NATIONWIDE ANALYSIS TO EXTEND THE CASE FOR ROUTINE PROPHYLAXIS	yes	3973	3	No	D. J. LaPar	Yes						https://www.ncbi.nlm.nih.gov/pubmed/26736156	Impact of Postoperative Venous Thromboembolism on Postoperative Morbidity, Mortality, and Resource Utilization after Hepatectomy.	University Of Virginia, Charlottesville, VA			2015-12-01		44	American journal of surgery
2012	NATIONAL TRENDS IN PANCREATICODUODENAL TRAUMA: INTERVENTIONS AND OUTCOMES	yes	25532	3	No	E. Ragulin-Coyne	Yes						http://www.sciencedirect.com/science/article/pii/S1365182X15315549	National trends in pancreaticoduodenal trauma: interventions and outcomes	Surgical Analysis & Outcomes (SOAR), University Of Massachusetts, Worcester, MA	2012-04-20	2013-03-28		2015-12-16	44	HPB
2013	SAFETY AND ADVANTAGES OF COMBINED RESECTION AND MICROWAVE ABLATION IN PATIENTS WITH BILOBAR HEPATIC MALIGNANCIES	no info	230	3	No	P. Philips	Yes						https://www.ncbi.nlm.nih.gov/pubmed/27405728	Safety and advantages of combined resection and microwave ablation in patients with bilobar hepatic malignancies.	University Of Louisville, Department Of Surgery, Division Of Surgical Oncology, Louisville, KY, USA			2017-02-01	2016-11-16	44	International Journal of Hyperthermia
2011	GOOD OUTCOMES OF ORTHOTOPIC LIVER TRANSPLANTATION AT SMALL VOLUME CENTER	no info	69	3	No	B. Nonthasoot	Yes	t.wipusit@gmail.com dr. Taesombat					https://www.ncbi.nlm.nih.gov/pubmed/25764625	Orthotopic liver transplantation at King Chulalongkorn Memorial Hospital: a report.	Department of Surgery, Faculty of Medicine, Chulalongkorn University, Bangkok			2015-01-01	2015-01-01	46	Journal of the Medical Association of Thailand
2012	RESECTION OF MULTI-SITE METASTASES FROM COLORECTAL CANCER: FEASIBILITY AND INTERIM RESULTS OF A MULTI-CENTRE PROSPECTIVE PHASE II STUDY	no info	23	2	No	A. C. Wei	Yes						https://www.ncbi.nlm.nih.gov/pubmed/27027312	Survival Following Resection of Intra- and Extra-Hepatic Metastases from Colorectal Cancer: A Phase II Trial.	1Toronto General Hospital, University Health Network, Toronto, ON	2015-11-23	2016-03-30	2016-08-01	2016-03-30	47	Annals of Surgical Oncology
2011	PILOT STUDY OF 18F-FLUOROCHOLINE PET/CT OF THE LIVER IN PATIENTS WITH HEPATOCELLULAR CANCER	yes	14	9	No	L L Wong	Yes	Dr. Kwee - kwee@hawaii.edu		YES - published			https://www.ncbi.nlm.nih.gov/pubmed/26090216	Chronic Liver Disease and the Detection of Hepatocellular Carcinoma by [(18)F]fluorocholine PET/CT.	1Cancer Research Center of Hawaii, Honolulu, Hawaii			2015-04-01	2015-05-19	48	Diagnostics
2012	X RESULTS OF SIMULTAENOUS LIVERKIDNEY TRANSPLANT: SINGLE CENTER REVIEW	yes	80	3	No	E. C. Maynard	Yes						https://www.ncbi.nlm.nih.gov/pubmed/27103549	Results of Simultaneous Liver and Kidney Transplantation: A Single-Center Review.	Washington University Department Of Abdominal Transplantation, St. Louis, MO	2016-01-09	2016-04-04	2016-07-01	2016-04-18	48	Journal of the American College of Surgeons
2013	METFORMIN DOES NOT INCREASE SURVIVAL FOR PATIENTS WITH DIABETES WHO UNDERGO PANCREATICODUODENECTOMY FOR PANCREATIC ADENOCARCINOMA	no	413	2	No	P. Toomey	Yes						file:///Users/chasemeyer/Downloads/Sulfonylureas__not_metformin__improve_survival_of.2.pdf	Sulfonylureas (not metformin) improve survival of patients with diabetes and resectable pancreatic adenocarcinoma	Florida Hospital Tampa, Tampa, FL, USA				2017-04-07	49	International journal of surgery: oncology
2013	NON-INVASIVE PREOPERATIVE QUANTIFICATION OF HEPATIC STEATOSIS USING A NOVEL MRI TECHNIQUE: 100% ACCURACY CONFIRMED WITH PATHOLOGIC ASSESSMENT	yes	16	11	No	T. A. Aloia	Yes						https://www.ncbi.nlm.nih.gov/pubmed/28528267	Using MRI to non-invasively and accurately quantify preoperative hepatic steatosis.	UT MD Anderson Cancer Center, Houston, TX, USA	2017-01-20	2017-04-10	2017-05-15	2017-05-17	50	HPB
2013	ROCK-STAR AND OTHER SHOCKINGLY UNCOMMON CAUSES OF PANCREATITIS?	no info	2	4	No	A. Abdo	Yes	n/a	4				https://www.ncbi.nlm.nih.gov/pubmed/26600983	Energetic etiologies of acute pancreatitis: A report of five cases.	Saint Agnes Hospital, Baltimore, MD, USA	2015-03-26	2015-10-23	2015-11-15	2015-11-15	56	World Journal of Gastrointestinal Pathophysiology
2013	STUDY OF TUMOR REGRESSION RATE IN RESECTED PANCREAS ADENOCARCINOMA AFTER NEOADYUVANT TREATMENT WITH GEMCITABINA AND NAB PLACLITAXEL. PREDICTIVE VALUE OF ELASTOGRAPHY	yes	15	11	No	H. Duran	Yes	Dr. Ielpo - ielpo.b@gmail.com					https://www.ncbi.nlm.nih.gov/pubmed/?term=duran+h%5Bauthor%5D+AND+gemcitabine	Preoperative treatment with gemcitabine plus nab-paclitaxel is a safe and effective chemotherapy for pancreatic adenocarcinoma.	Sanchinarro University Hospital, Madrid, Spain		2016-01-07	2016-09-01	2016-01-29	58	European Journal of Surgiclal Oncology
2011	GENERATION OF A RECOMBINANT HEME OXYGENASE TO PROTECT TRANSPLANTED STEATOTIC LIVERS FROM REPERFUSION INJURY	no info	0	7	No	S. M. Livingstone	Yes	n/a					https://www.ncbi.nlm.nih.gov/pubmed/?term=livingstone+s%5Bauthor%5D+AND+oxygenase	Delivery of Soluble Heme Oxygenase 1 Cell-Penetrating Peptide into Liver Cells in in vitro and ex vivo Models of Cold Ischemia.	Department of Surgery, Dalhousie University, Halifax, NS	2016-06-21	2016-09-26	2017-02-01	2016-11-12	68	European Surgical Research
2012	SIMULTANEOUS PANCREATECTOMY AND COLECTOMY: A SAFE COMBINATION?	yes	1196	9	No	M. G. House	Yes	Dr. Ceppa - eceppa@iupui.edu		YES - no			https://www.ncbi.nlm.nih.gov/pubmed/?term=house+m%5Bauthor%5D+AND+pancreatectomy+AND+colectomy	Indication for en bloc pancreatectomy with colectomy: when is it safe?	Department Of Surgery, Indianapolis, IN				2017-06-29	75	Surgical Endoscopy
																		Impact Factor	Journal Name	Number of Publications
2011	ALTERNATIVE MANAGEMENT OF A REPLACED COMMON HEPATIC ARTERY PSEUDOANNEURYSM	No Info	1	4	No	F. Abdelsayed	no	n/a
2011	TREATMENT OUTCOMES AND MSKCC SCORING IN 1281 PATIENTS UNDERGOING RESECTION FOR COLORECTAL LIVER METASTASE	Yes	1281	2	No	R.A. Adair	no	Dr. Toogood - giles.toogood@leedsth.nhs.uk		no - invalid email
2011	MINIMALLY INVASIVE PANCREATICODUODENECTOMY	no info	1	5	No	P. Bao	no
2011	A COMPARATIVE STUDY OF OPERATIVE RESECTION VERSUS RADIOFREQUENCY ABLATION FOR THE TREATMENT OF METASTATIC COLORECTAL METASTASES TO THE LIVER FOR INITIALLY RESECTABLE DISEASE boostrom	yes	581	3	No	S. Y. Boostrom	no
2011	RESECTION OF A SYMPTOMATIC PORTAL VEIN ANEURYSM IN A PATIENT WITH PRIOR GASTRIC BYPASS	no info	1	4	No	L. P. Brewster	no
2011	EVALUATION OF PROGNOSTIC INDICES AND OVERALL SURVIVAL OF RESECTABLE AMPULLARY ADENOCARCINOMA	yes	72	3	No	C.Y. Chai	no
2011	ROLE OF PANCREATIC DUCT STENT PLACEMENT PRIOR TO DISTAL PANCREATECTOMIES IN PREVENTION OF PANCREATIC LEAK	no	19	3	No	N. Chandolias	no
2011	MICROWAVE ABLATION FOR HEPATOCELLULAR CARCINOMA IN PATIENTS WITH CIRRHOSIS AND PORTAL HYPERTENSION	yes	24	3	No	Chapochnick J. Friedmann	no
2011	AGGRESSIVE SURGERY FOR UNRESECTABLE PANCREATIC NEUROENDOCRINE TUMORS FOLLOWING CAPECITABINEOXALIPLATIN- BEVACIZUMAB CHEMOTHERAPY	no info	19	9	No	Y. Chen	no	dr. Poultsides - gpoultsides@stanford.edu
2011	THE ELEVATION OF ZINC-FINGER TRANSCRIPTION FACTOR ZBP-89 IN HEPATOCELLULAR CARCINOMA AND ITS CLINICAL VALUE	no info	0	7	No	George G Chen	no	Dr. Yun - yunjp@sysucc.org.cn							1The Chinese University of Hong Kong, Hong Kong
2011	SMOKING HISTORY AFFECTS SURVIVAL IN HEPATOCELLULAR CARCINOMA PATIENTS UNDERGOING LIVER RESECTION BUT NOT OTHER TREATMENTS	yes	629	3	No	J.J. Clark	no
2011	CONTINUOUS INFUSION WITH TIMP-3 PRESERVES LIVER HISTOLOGY BY PROMOTING A FAVORABLE CYTOKINE PROFILE DURING SUB-LETHAL TOTAL HEPATIC ISCHEMIA IN RATS	yes	12	12	No	A.J Cohen	no	acohen@ochsner.org
2011	SALVAGE THERAPY WITH TIMP-3 PRESERVES LIVER HISTOLOGY BY PREVENTING APOPTOSIS DURING SUB-LETHAL TOTAL HEPATIC ISCHEMIA IN RATS	yes	12	12	No	A.J. Cohen	no
2011	REGIONALIZATION OF PANCREATIC RESECTION FOR MALIGNANCY IN NY STATE	yes	2568	3	No	D. D. Cox	no	n/a
2011	LAPAROSCOPIC DISTAL PANCREATECTOMY, A SINGLE CENTRE EXPERIENCE	no info	40	3	No	M D'hondt	no	Dr. Vandenbroucke-Menu - fvdbm.UdeM@me.com
2011	RECURRENT COLORECTAL LIVER METASTASES FOLLOWING RADIOFREQUENCY ABLATION, TREATMENT FAILURE OR DISEASE PROGRESSION?	no info	130	3	No	K. M. Davis	no	Dr. Hansen - phansen@orclinic.com
2011	SEVERE ACUTE PANCREATITIS AND ABDOMINAL COMPARTMENT SYNDROME – INCIDENCE AND OUTCOMES OF DECOMPRESSIVE LAPOROTOMY	yes	45	3	No	P.J. Davis	no	Dr. Molinari - michele.molinari@cdha.nshealth.ca
2011	UNDERSTANDING BARRIERS TO ACCESS IN THE MANAGEMENT OF COLORECTAL CANCER LIVER METASTASES: A QUALITATIVE APPROACH	no info	0	6	No	K.S. Devitt	no	Dr. Wei - Alice.Wei@uhn.ca											2011-03-01
2011	EARLY LIVER RECURRENCE AFTER ADJUVANT CHEMOTHERAPY FOR COLORECTAL CANCER IS ASSOCIATED WITH WORSE DISEASE-FREE SURVIVAL FOLLOWING HEPATIC RESECTION	yes	170	3	No	A. L. Diniz	no	dr.aldiniz@gmail.com
2011	PANCREATIC RESECTION FOR METASTATIC TUMORS TO THE PANCREAS: ANALYSIS OF 5 CASES AND REVIEW OF LITERATURE	no info	5	3	No	A. L. Diniz	no	dr.aldiniz@gmail.com
2011	A RISK ASSESSMENT OF BILIARY COMPLICATIONS AFTER DECEASED DONOR LIVER TRANSPLANTATION	yes	354	3	No	C. Enestvedt	no	n/a
2011	MANAGEMENT ALGORITHM FOR HEPATIC ANGIOMYOLIPOMA	no info	0	4	No	M feinman	no	n/a
2011	ROSIGLITAZONE ANTAGONIZES GEMCITABINE ACTIVITY IN PANCREATIC ADENOCARCINOMA VIA CELL-CYCLE ARREST	no info	0	7	No	M. A. Firpo	no	matt.firpo@hsc.utah.edu
2011	SERUM MMP-7 IS AN INDEPENDENT PREDICTOR OF SURVIVAL IN PATIENTS WITH PANCREATIC ADENOCARCINOMA	yes	0	7	No	M. A. Firpo	no	matt.firpo@hsc.utah.edu
2011	OUTCOMES ARE INFERIOR IN PATIENTS REQUIRING VENOUS RESECTION FOR LOCALLY ADVANCED PERIAMPULLARY TUMORS	no	621	3	No	C. P. Fischer	no	cpfischer@tmhs.org		no - invalid email
2011	IN-VITRO SENSITIVITY PROFILE OF LOCALIZED AND METASTATIC PANCREATIC CANCER	yes	93	7	No	J. Franko	no	jan.franko@gmail.com		YES - no
2011	SOLID PSEUDOPAPILLARY TUMOR OF THE PANCREAS: SURGICAL OUTCOMES AT A SINGLE TERTIARY CENTER	no info	25	3	No	J. Galovich	no	n/a
2011	GALLBLADDER CARCINOMA: EXPERIENCE AT A NON-URBAN REFERRAL CENTER	no info	10	4	No	D. R. Hall	no	n/a
2011	HEALTH CARE DELIVERY FOR HEPATOCELLULAR CARCINOMA IN MISSISSIPPI: DO DISPARITIES EXIST?	yes	0	3	No	TS Helling	no	thelling@umc.edu
2011	POST-OPERATIVE BILE LEAKAGE IN LIVER RESECTION: EARLY EXPERIENCE IN NATIONAL GENERAL HOSPITAL H. ADAM MALIK MEDAN INDONESIA	no info	14	2	No	B. Irwan	no	n/a
2011	VARYING CLINICAL AND RADIOLOGICAL PRESENTATION OF DUODENAL GASTROINTESTINAL STROMAL TUMORS	no info	8	3	No	KL Jackson	no	Dr. Charpentier - lcharpentier@lifespan.org		no - invalid
2011	MAJOR HEPATIC RESECTION COMBINED WITH PORTAL VEIN OR HEPATIC ARTERY RECONSTRUCTION FOR ADVANCED BILIARY CARCINOMA IN THE HEPATIC HILUM	no	45	9	No	H kamachi	no	kamachi@sci.u-toyama.ac.jp
2011	PARAGANGLINOMA OF THE PANCREAS: CASE SERIES AND REVIEW OF LITERATURE	no info	2	4	No	E kansakar	no	n/a
2011	FACTORS INFLUENCING RECURRENCE PATTERNS AFTER RESECTION FOR HEPATOCELLULAR CARCINOMA	yes	230	3	No	KJ Kelly	no	Dr. Weber - webers@surgery.wisc.edu
2011	SURGICAL MANAGEMENT OF RENAL CELL CARCINOMA METASTATIC TO THE PANCREAS	no info	18	3	No	A. S. Khan	no	khana@wudosis.wustl.edu		YES - not published
2011	PANCREATICODUODENECTOMY (PD) COMPLICATES MULTIVISCERAL RESECTIONS IN HEPATOPANCREATOBILIARY SURGERY	no info	9	3	No	A. Khithani	no	rohanjeyarajah@gmail.com (author is D. Rohan Jeyarajah)
2011	PANCREATICOJEJUNAL ANASTOMOTIC STRICTURES: WHY REVISE WHEN THERES A PANCREATICOGASTROSTOMY	no info	4	9	No	A. Khithani	no	rohanjeyarajah@gmail.com (author is D. Rohan Jeyarajah)
2011	RIGHT HEPATECTOMY WITH PORTAL VEIN TUMOR THROMBECTOMY FOR HCC	no info	1	4	No	K Kim	no	kmkim@amc.seoul.kr
2011	IS THE EVER-EXPANDING SCOPE OF ROBOTICS SAFE FOR HEPATOBILIARY SURGERY TOO?	no info	46	3	No	K. Kitisin	no	Dr. Tsung - tsunga@upmc.edu
2011	LAPAROSCOPIC HEMIHEPATECTOMY: EVOLUTION OF APPROACH AND TECHNIQUES OVER AN EXPERIENCE OF 252 CASES	no info	258	3	No	A Koffron	no	alan.koffron@beaumont.edu
2011	FEASIBILITY AND PROGNOSTIC FACTORS OF SALVAGE LIVING DONOR LIVER TRANSPLANTATION FOR HEPATOCELLULAR CARCINOMA	no info	206	9	No	Y Konishi	no	Dr. Tahara - matahara@east.ncc.go.jp
2011	RADIOEMBOLIZATION FOR TREATMENT OF METASTATIC OCULAR MELANOMA TO THE LIVER: AN INITIAL EXPERIENCE	no	144	11	No	K Kosari	no	Dr. MacKenzie -- Mackenzie.shawn@gmail.com		YES - no
2011	BRUNNER’S GLAND HAMARTOMA: A CASE REPORT AND META-ANALYSIS	no info	93	10	No	D. J. Laird	no	diana.laird@ucsf.edu
2011	IMPACT OF MULTIVISCERAL RESECTION IN PATIENTS WITH PANCREATIC CANCER: PERIOPERATIVE MORBIDITY AND SURVIVAL	yes	23	9	No	M. K. Lee	no	Dr. Allendorf - jallendorf@winthrop.org		YES - no
2011	ORGAN SPACE INFECTION AFTER PANCREATIC SURGERY: ARE WE IMPROVING?	yes	10359	3	No	M. j. Leonardi	no	Dr. Howard - tjhoward@iupui.edu
2011	DOES THE PRESENCE OF METASTATIC LYMPH NODES PREDICT MARGIN POSITIVE RESECTION IN PANCREATIC CANCER?	no info	82	3	No	K lowe	no	Dr. Jeyarajah - rohanjeyarajah@gmail.com
2011	GALL BLADDER CANCER DIAGNOSED WITHOUT CHOLECYSTECTOMY: AUTOMATIC REFERRAL TO A HEPATOBILIARY SURGEON?	no info	35	3	No	K M lowe	no	Dr. Jeyarajah - rohanjeyarajah@gmail.com
2011	MARGIN STATUS AFTER PANCREATODUODENECTOMY FOR PERIAMPULLARY AND HEAD OF PANCREAS TUMORS: ANATOMY OR TUMOR BIOLOGY?	yes	109	3	No	K Lowe	no	Dr. Jeyarajah - rohanjeyarajah@gmail.com
2011	CYSTIC PANCREATIC NEOPLASM REMOVED BY CENTRAL PANCREATECTOMY THROUGH LESSER SAC APPROACH	no info	1	5	No	D. A. Machado-aranda	no	dmachad@med.umich.edu
2011	ISOLATED RESECTION OF CAUDATE LIVER LOBE BY HANGING TECHNIQUE	no info	2	4	No	DA Machado-aranda	no	dmachad@med.umich.edu
2011	AN AGGRESSIVE MULTI-DISCIPLINARY APPROACH TO ADVANCED NEUROENDOCRINE TUMORS	no info	1	5	No	S. MacKenzie	no	Dr. MacKenzie -- Mackenzie.shawn@gmail.com		YES - no
2011	PANCREATICOCYSTOSTOMY FOR LIVING-RELATED DONOR PANCREAS TRANSPLANTATION	no info	15	9	No	M. Maruyama	no	pxe00530@nifty.ne.jp
2011	OVER-EXPRESSION OF AQUAPORIN 8 (AQP8) INHIBITS TUMOR FORMATION IN A RAT MODEL OF HEPATOCELLULAR CARCINOMA (HCC)	yes	0	12	No	M A Mattocks	no	Dr. McKillop - iain.mckillop@carolinashealthcare.org
2011	COMMON BILE DUCT EXPLORATION: A LOST ART	yes	1602	3	No	J. E. Meyer	no	n/a
2011	DIAGNOSTIC ACCURACY OF MAGNETIC RESONANCE CHOLANGIOPANCREATOGRAPHY IN PATIENTS WITH SUSPECTED CHOLEDOCHOLITHIASIS	no info	380	3	No	P N nau	no	peter.nau@osumc.edu		no - invalid email
2011	A NEW TECHNIQUE FOR PANCREATICOJEJUNOSTOMY USING FULL THICKNESS PANCREATIC STAY SUTURES AND VIDEO MICROSCOPY	no info	0	14	No	N N Nissen	no	Nicholas.nissen@cshs.org
2011	CHOLEDOCHAL CYST DISEASE: LONGTERM FOLLOW-UP AT A SINGLE HIGHVOLUME INSTITUTION	no info	92	3	No	K olino	no	Dr. Edil - bedil1@jhmi.edu		no - invalid
2011	PANCREATODUODENECTOMY IN PATIENTS WITH HEPATIC CIRRHOSIS: IS IT WORTHWHILE?	no info	848	3	No	J. B. Patel	no	Dr. Howard - tjhoward@iupui.edu
2011	PANCREATIC CANCER FOLLOWING A DIAGNOSIS OF NEW-ONSET DIABETES: A POPULATION-BASED STUDY	yes	22493	3	No	E Ragulin-Coyne	no	Dr. Tseng - jftseng@bidmc.harvard.edu
2011	IS LIVER HYDATIDOSIS ALWAYS A SURGICAL DISEASE?	yes	62	11	No	J. M. Ramia	no	jose_ramia@hotmail.com
2011	MULTICENTRE STUDY OF LIVER METASTASES FROM BREAST CANCER	no info	108	9	No	J. M. Ramia	no	jose_ramia@hotmail.com
2011	NOVEL QUANTIFICATION OF THE DECAY OF TEMPORAL ACCURACY OF HIGH QUALITY AXIAL IMAGING FOR PANCREATIC CANCER	yes	256	3	No	S Reddy	no	dr. wolfgang - cwolfga2 @jhmi.edu
2011	CEACAM6 EXPRESSION IN GALLBLADDER CARCINOMA	yes	70	7	No	F. G. Rocha	no	flavio.rocha@virginiamason.com		no - invalid email
2011	MARKED VARIANCE BETWEEN ESTIMATED AND CALCULATED BLOOD LOSS FOR PANCREATIC RESECTION SURGERY	no info	569	3	No	N J Sanchez	no	Dr. Vollmer - Charles.Vollmer@uphs.upenn.edu		YES- no
2011	PULMONARY AND VENOUS THROMBOEMBOLISM RATES AMONGST LIVER RESECTION PATIENTS: AN EXAMINATION OF NSQUIP DATA	yes	6084	3	No	J schwartz	no	jason.schwartz@utsouthwestern.edu		no - invalid email
2011	REDUCTION IN TUMOR RECURRENCE FOLLOWING TREATMENT WITH AN NFKAPPAB INHIBITOR IN A MOUSE RESECTION MODEL OF PANCREATIC DUCTAL ADENOCARCINOMA	yes	25	12	No	JE Shea	no	Dr. Scaife - courtney.scaife@hci.utah.edu
2011	GALLBLADDER PATCH REPAIR FOR LARGE-SIZED DUODENAL ULCER PERFORATIONS	no info	2	4	No	A shimizu	no	ashimizu@iwate-med.ac.jp
2011	THE AJCC STAGING SYSTEM FOR HEPATOCELLULAR CARCINOMA PREDICTS SURVIVAL IN MEDICALLY TREATED WESTERN PATIENTS	yes	299	3	No	V. Siripurapu	no	Dr. Hoffman - JP_Hoffman@fccc.edu
2011	MINIMALLY INVASIVE RETROPERITONEAL NECROSECTOMY IN SEVERE ACUTE PANCREATITIS: SINGLE CENTER EXPERIENCE	no info	19	3	No	V Sitaram	no	surl@cmcvellore.ac.in		no - invalid
2011	THERAPY OF LIVER METASTASES OF CARCINOID – OUR EXPERIENCES	no info	15	4	No	T Skalicky	no	skalicky@fnplzen.cz
2011	RECOMMENDATIONS AND PERFORMANCE OF RESECTION FOR LOCALIZED HEPATOCELLULAR CARCINOMA IN THE MEDICARE POPULATION	yes	2445	3	No	J K Smith	no	Dr. Tseng - jftseng@bidmc.harvard.edu
2011	HEPATIC ADENOMATOSIS: OUTCOMES AND HISTOLOGIC HETEROGENEITY	no info	46	3	No	R L Smoot	no	Dr. Truty - truty.mark@mayo.edu
2011	LAPAROSCOPIC PANCREAS SPARING PARTIAL DUODENAL RESECTION	no info	5	2	No	J. A. Stauffer	no	stauffer.john@mayo.edu
2011	PANCREATICODUODENECTOMY IN THE ELDERLY PATIENTS: AN EVALUATION OF THE MODIFIED POSSUM SCORING SYSTEM	no info	316	3	No	T. Tanaka	no	n/a
2011	COMPLICATIONS OF ROBOT-ASSISTED LAPAROSCOPIC PANCREATICODUODENECTOMY: AN EARLY EXPERIENCE	no info	23	3	No	R Uppal	no	Dr. hammill - chammill@orclinic.com		no - invalid
2011	DISTAL PANCREATECTOMY FOR PANCREATIC ADENOCARCINOMA: CLINICOPATHOLOGIC CHARACTERISTICS AND LONG TERM SURVIVAL	yes	1918	3	No	R Venkat	no	dr. wolfgang - cwolfga2 @jhmi.edu
2011	INTRADUCTAL PAPILLARY MUCINOUS NEOPLASMS (IPMN) <3 CM ON IMAGING: CLINICOPATHOLOGICAL CHARACTERISTICS AND THE IMPORTANCE OF SOLID COMPONENTS	yes	98	3	No	R Venkat	no	dr. wolfgang - cwolfga2 @jhmi.edu
2011	FIRST DISSECTION OF THE SUPERIOR MESENTERIC ARTERY IN PANCREATICODUODENECTOMY FOR CANCERS OF THE PERIAMPULLARY REGION	no info	0	14	No	E. Vicente	no	n/a
2011	SURGICAL TECHNIQUE OF ARTERIAL RESECTION IN RADICAL PANCREATIC SURGERY	no info	0	14	No	E. Vicente	no	n/a
2011	VASCULAR GRAFTS OF CADAVERIC DONOR. AN EXCELLENT ALTERNATIVE FOR HEPATIC VENOUS OUTFLOW RECONSTRUCTION IN PATIENTS WITH RECURRENT LIVER METASTASES INVOLVING HEPATIC VENOUS OUTFLOW	no info	1	4	No	E Vicente	no	n/a
2011	CHOLANGIOCARCINOMA IN SITU WITH EXTENSIVE INTRAEPITHELIAL SPREAD IN A NON-CIRRHOTIC PATIENT PRESENTING WITH BILIARY OBSTRUCTION	no info	1	4	No	Z Wang	no	Dr. Martinie - John.martinie@carolinashealthcare.org
2011	DENVER PERITONEOVENOUS SHUNTS: A SURGICAL OPTION FOR REFRACTORY ASCITES DUE TO MALIGNANCY OR CIRRHOSIS	no info	1	5	No	M A White	no	Dr. Zervos - ZERVOSE@ecu.edu							East Carolina University, Pitt County Memorial Hospital, Greenville, NC
2011	THE IMPACT OF SPINAL ANALGESIA ON PANCREATIC SURGERY OUTCOMES	yes	107	3	No	M D Winner	no	Dr. Allendorf - jallendorf@winthrop.org		YES - no
2011	METHOD OF SPLENIC PRESERVATION DURING DISTAL PANCREATECTOMY IMPACTS FISTULA RATES	yes	675	3	No	E R Winslow	no	winslow@surgery.wisc.edu		YES no
2011	NATIONWIDE PATTERNS IN RESECTION FOR METASTATIC PANCREATIC CANCER	yes	3647	3	No	E R Witkowski	no	Dr. Tseng - jftseng@bidmc.harvard.edu
2011	CIRCULATING TUMOR CELLS IN PATIENTS UNDERGOING LIVER RESECTION FOR COLORECTAL CANCER LIVER METASTASES	yes	33	7	No	G. Zogopoulos,	no	George.zogopoulos@mcgill.ca
2011	SIZE OF TUMOUR PREDICTS OUTCOME IN REDO RESECTION FOR COLORECTAL LIVER METASTASES	no info	0	4	No	G Zogopoulos	no	George.zogopoulos@mcgill.ca
2012	AGGRESSIVE (SHOTGUN) APPROACH TO THE NONOPERATIVE MANAGEMENT OF SEVERE PANCREATIC DUCT DISRUPTION	no info	0	4	No	A. Abdo	no	n/a
2012	SURGICAL APPROACH IN PANCREATIC CANCER WITH PREOPERATIVE 3D-CT COMPUTER ASSISTED SURGERY PLANNING	no info	4	4	No	Y Abe	no	abey3666@gmail.com	2018-06-21
2012	EVALUATION OF THE HJORTSJO CROOK SIGN IN THE DELINEATION OF THE RIGHT POSTERIOR BILE DUCT ANATOMY IN MIDDLE EASTERN PATIENTS	no info	86	11	Yes	H. M. Alghamdi	no	hananghamdi@yahoo.com		YES - no			IS A ABSTRACT PUB
2012	SINGLE CENTER EXPERIENCE WITH IRREVERSIBLE ELECTROPORATION FOR LIVER AND PANCREAS TUMOR ABLATION	no info	29	3	No	N S Ali	no	Dr. Raofi - vraofi1@uic.edu		no - invalid email
2012	LAPAROSCOPIC TRANSECTION OF THE THICK PANCREAS; A NON-STAPLER TECHNIQUE	no info	0	14	No	A Alseidi	no	Adnan.alseidi@virginiamason.org	Yes - no
2012	EX-VIVO RIGHT TRISECTIONECTOMY WITH CAVAL RESECTION	no info	1	4	No	F. A. Alvarez	no	fernando.alvarez@hospitalitaliano.org.ar		YES - no
2012	CONFOCAL MICROSCOPY IN COMBINATION WITH OBLIQUE INCIDENCE DIFFUSE REFLECTANCE SPECTROSCOPY FOR THE CONFIRMATION OF TUMOR FREE SURGICAL MARGINS IN PANCREATIC CANCER	no info	14	7	No	A amini	no	albertamini23@gmail.com
2012	CLINICAL OUTCOMES OF ANAPLASTIC PANCREATIC CANCER	yes	39	3	No	J. Arun	no	Dr. Reid-Lombardo - reidlombardo.kaye@mayo.edu		no - invalid email					Mayo Clinic, Rochester, MN
2012	LOW BASELINE LEAN BODY MASS NEGATIVELY PREDICTS COMPLETION OF NEOADJUVANT THERAPY AMONG PATIENTS WITH RESECTABLE AND BORDERLINE RESECTABLE PANCREATIC CANCER	yes	132	11	No	E. A. Asare	no	easare@facs.or		no - invalid email
2012	EXPLORATION OF ENHANCING PANCREATIC CANCER TARGETED COMBINATION THERAPY THROUGH ANTIENDOTHELIAL EMAP II	no info	0	7	No	N. Awasthi	no	nAwasthi@iupui.edu
2012	IS THE TYPE OF POST-OPERATIVE PAIN CONTROL RELATED TO PANCREATIC FISTULA FORMATION AFTER OPEN DISTAL PANCREATECTOMY?	no	153	3	No	H H Bach IV	no	n/a
2012	METASTATIC HEMANGIOPERICYTOMA REQUIRING EX VIVO LIVER RESECTION	no info	1	4	No	S. L. Bokshan	no	Dr. Chapman - chapmanw@wudosis.wustl.edu
2012	SMA FIRST DISSECTION TO FACILITATE VENOUS RESECTION DURING PANCREATICODUODENECTOMY	no	34	3	No	D. Bourgeois	no	n/a
2012	PANCREATIC FISTULA AFTER RESECTION OF PANCREATIC DUCTAL ADENOCARCINOMA DOES NOT ADVERSELY AFFECT DISEASE FREE SURVIVAL	no	74	3	No	R. M. Cannon	no	rmcann03@louisville.edu		no - invalid email
2012	PREDICTORS OF SURVIVAL IN GALLBLADDER CANCER: A REVIEW OF 90 PATIENTS SUBMITTED TO SURGERY WITH CURATIVE INTENT	yes	90	3	No	D. Cavallucci	no	n/a
2012	LIVER-SPLEEN ATTENUATION RATIO PREDICTS CHEMOTHERAPYASSOCIATED STEATOHEPATITIS IN MULTIDISCIPLINARY TREATMENT OF COLO-RECTAL LIVER METASTASES	yes	419	3	No	S. Cecchini	no	Dr. Ferrone - cferrone@partners.org
2012	REDUCED POST-OPERATIVE COMPLICATIONS WITH LAPAROSCOPIC VERSUS OPEN DISTAL PANCREATECTOMY: A META-ANALYSIS	yes	1753	10	No	S. A. Chadi	no	samchadi@gmail.com		no
2012	LAPAROSCOPIC EXCISION OF TYPE IV A CHOLEDOCHAL CYST INCLUDING LEFT HEPATECTOMY	no info	1	5	No	J Chavez	no	n/a
2012	DOES HEALTH INSURANCE PLAY A ROLE IN THE OUTCOME OF PEOPLE WITH HEPATOBILIARY CANCER?	no info	250	3	No	P. V. Cherian	no	n/a
2012	LAPAROSCOPIC CHOLECYSTECTOMY IN PATIENTS WITH ASCITES AND/OR ESOPHAGEAL VARICES; PREDICTORS OF MORTALITY	yes	409	3	No	S. W. Cho	no	Dr. Hansen - phansen@orclinic.com
2012	INDICATIONS, TECHNIQUE AND OUTCOMES FOR CENTRAL PANCREATECTOMY. AN UPDATED EXPERIENCE	no	43	11	No	C. Correa-Gallego	no	juancamilocorrea@hotmail.com
2012	TECHNICAL REFINEMENT OF ROBOT-ASSISTED PANCREATICODUODENECTOMY: IMPROVING OUTCOMES AT A SINGLE INSTITUTION	yes	76	3	No	M. Daouadi	no	Dr. Moser - jmoserl@bidmc.harvard.edu		no - invalid email
2012	COMBINED RADIOFREQUENCY ABLATION AND RESECTION FOR METASTASIC COLORECTAL CANCER TO THE LIVER	no info	53	3	No	S. G. De la Fuente	no	Sebastian.delafuente.md@flhosp.org
2012	MULTIDISCIPLINARY MANAGEMENT OF METASTATIC EWING SARCOMA TO LIVER: A FOCUS ON REGIONAL THERAPY AND REVIEW OF THE LITERATURE	no info	1	4	No	S. G. De La Fuente	no	Sebastian.delafuente.md@flhosp.org
2012	MULTIDISCIPLINARY MANAGEMENT OF PANCREATIC VIPOMAS: EXPERIENCE FROM A LARGE REFERRAL CENTER	no info	14	3	No	S. G. De La Fuente	no	Sebastian.delafuente.md@flhosp.org
2012	CLINICAL PREDICTORS OF EPCAM OVER-EXPRESSION IN PATIENTS WITH HEPATOCELLULAR CARCINOMA: AN EVALUATION	no	24	7	No	E. M. Dunki-Jacobs	no	Dr. Martin -- robert.martin@louisville.edu
2012	OUTCOMES OF PANCREATIC SURGERY: A RETROSPECTIVE ANALYSIS FROM A CANADIAN TERTIARY CARE CENTER	no info	160	3	No	K. M. Eltawil	no	Dr. Molinari - michele.molinari@cdha.nshealth.ca
2012	A SAFE LAPARSCOPIC APPROACH TO LEFT PORTAL PEDICLE CONTROL: LIGAMENTUM VENOSUM TECHNIQUE	no info	0	14	No	I. Gur	no	gur@ohsu.edu		no - invalid email
2012	NEW TRICKS FOR AN OLD DOG: ACHIEVING HIGH ASSISTED PATENCY FOR PERITONEOVENOUS SHUNTS	no info	0	14	No	Z. P. Englert	no	englertz@ecu.edu		no - invalid email
2012	PREOPERATIVE BILIARY DRAINAGE, REGARDLESS OF HOW ACHIEVED, DOES NOT IMPACT OUTCOMES FOLLOWING PANCREATICODUODENECTOMY FOR CANCER	no	75	11	No	Z. P. Englert	no	englertz@ecu.edu		no - invalid email
2012	CULTURE-DIRECTED TREATMENT OF BACTERIOBILIA AND BILIARY CANDIDIASIS AFTER WHIPPLE DECREASES POST-OPERATIVE INFECTIONS	no	189	3	No	C. H. Evans	no	n/a
2012	CELLULAR ATYPIA IN PANCREATIC CYST CYTOLOGY ASSESSMENTS: SURGERY IS OFTEN REQUIRED	no info	421	3	No	G. A. Falk	no	falkg2@ccf.org		no - invalid email
2012	MICROWAVE ABLATION FOR CIRRHOTIC PATIENTS WITH HEPATOCELLULAR CARCINOMA WITH AND WITHOUT COMBINATION OF OTHER LIVER DIRECTED THERAPIES: LONG TERM FOLLOW UP	yes	32	3	No	E. Feinberg	no	emfeinbe@bu.edu
2012	IMPACT ON QUALITY OF LIFE AFTER BILE DUCT INJURY REPAIR: A PROSPECTIVE STUDY COMPARING SCORES BEFORE AND A YEAR AFTER SURGERY	yes	40	11	No	B. Franssen	no	email dr. mercado - mamercado@quetzal.innsz.mx		no - invalid email
2012	HOW DOES LAPAROSCOPIC ASSISTED PANCREATICODUODECTOMY COMPARE TO THE CONVENTIONAL OPEN SURGICAL APPROACH?	yes	53	3	No	J. A. Graham	no	jay.a.graham@gunet.georgetown.edu
2012	ANALYSIS OF 787 COMMON BILE DUCT EXPLORATIONS FROM THE NSQIP DATABASE	yes	787	3	No	J. R. Gutnick	no	n/a
2012	MINIMALLY INVASIVE SURGEON IN HEPATOPANCREATOBILIARY SURGERY FELLOWSHIP: ONE ACADEMIC CENTERS MODEL	no info	0	6	No	O. Hamed	no	Dr. Gusani - ngusani@hmc.psu.edu
2012	STOMACH PRESERVING DISTAL PANCREATECTOMY WITH CELIAC AXIS RESECTION: THE BENEFIT AND CHALLENGE OF A REPLACED RIGHT HEPATIC ARTERY	no info	0	4	No	O. Hamed	no	Dr. Gusani - ngusani@hmc.psu.edu
2012	DECREASING TRENDS IN SURGERY FOR PANCREATIC CANCER: A 21-YEAR POPULATION-BASED ANALYSIS	yes	17880	3	No	D. M. Hari	no	Dr. Bilchik -- abilchik@aol.com
2012	RESECTION OF RENAL CELL CARCINOMA METASTATIC TO THE LIVER: A DUAL-CENTER ANALYSIS	no info	31	3	No	Y. Hatzaras	no	dr. wolfgang - cwolfga2 @jhmi.edu
2012	TRANSTHORACIC TRANSDIAPHRAGMATIC VIDEOSCOPICASSISTED MICROWAVE ABLATION (MWA) OF SMALL HCC IN SEGMENT VII	no info	1	4	No	W. S. Helton	no	Adnan.alseidi@virginiamason.org	Yes - no
2012	COMPLETE RESPONSE TO TACE FOR HCC DOES NOT MEAN CURE	no	104	3	No	J. C. Henry	no	Dr. Schmidt - carl.schmidt@osumc.edu
2012	PATIENT AND CLINICOPATHOLOGICAL FEATURES, AND PROGNOSIS OF CK19+ HEPATOCELLULAR CARCINOMAS: A CASE-CONTROL STUDY	no info	386	3	No	J. Jang	no	Dr. Cleary - sean.cleary@uhn.ca
2012	CENTRAL PANCREATECTOMY	no info	1	4	No	A. Kamyab	no	armin.kamyab@coxhealth.com
2012	CHOLEDOCHODUODENOSTOMY FOR BENIGN BILIARY STRICTURE	no info	1	4	No	A. Kamyab	no	armin.kamyab@coxhealth.com
2012	PANCREATICODUODENECTOMY: 22 YEAR COMPARATIVE OUTCOME ANALYSIS IN A SINGLE INSTITUTION AND THE EFFECT OF ACQUIRING A FELLOWSHIP TRAINED HEPATICOPANCREATICOBILIARY SURGEON	no info	125	3	No	A. Kamyab	no	armin.kamyab@coxhealth.com
2012	RADIOFREQUENCY-ASSISTED LIVER RESECTION	no info	19	11	No	M. Kerem	no	keremm1@yahoo.com
2012	INTRAOPERATIVE ULTRASOUND GUIDED DISSECTION DURING THE WHIPPLE PROCEDURE	no info	0	14	No	I. Koleilat	no	ikoleilat@gmail.com		YES -- no
2012	THE ROLE OF PROPROTEIN CONVERTASES IN COLON CANCER PROGRESSION	yes	0	7	No	J. Kwan	no	janet.kwan@mail.mcgill.ca
2012	SPONTANEOUS RUPTURE OF PYOGENIC LIVER ABSCESS – AN ASIAN PERSPECTIVE	yes	109	11	No	S. Y. Lee	no	seryee@yahoo.com
2012	IL-10 AND PD1 MEDIATE T CELL SUPPRESSION IN JAUNDICED ANIMALS WITH OPPOSING EFFECTS ON INFLAMMATORY CYTOKINE PRODUCTION	yes	0	12	No	L. A. Licata	no	Dr. Katz - skatz@chartercare.org
2012	UTILIZATION AND OUTCOMES OF PATIENTS WITH COLORECTAL LIVER METASTASES IN THE MEDICARE POPULATION	yes	7131	3	No	C. W. Macomber	no	Dr. Shah -- shimul.shah@umassmemorial.org
2012	THREE-DIMENSIONAL (3-D) CT VIRTUAL SIMULATION AND SURGICAL PLANNING FOR MINIMALLY INVASIVE HEPATIC RESECTION	no info	0	14	No	A. V. Maker	no	amaker@uic.edu
2012	FACTORS ASSOCIATED WITH READMISSION FOLLOWING COMPLEX HEPATO-PANCREATO-BILIARY OPERATIONS	yes	246	3	No	J. C. Mansour	no	john.mansour@utsouthwestern.edu		YES - no
2012	INITIAL EXPERIENCE WITH A COMPREHENSIVE TISSUE BIOBANKING PROGRAM FOCUSING ON COMPLEX GASTROINTESTINAL CANCER RESECTIONS	yes	285	11	No	J. C. Mansour	no	Dr. Yopp - adam.yopp@utsouthwestern.edu
2012	POST NECROTIC PANCREATIC PSEUDOCYST. LAPAROSCOPIC TECHNIQUES	no info	3	14	No	O. Mazza	no	Dr. Pekolj - juan.pekolj@hospitalitaliano.org.ar
2012	RIGHT TRISECTIONECTOMY PLUS CAUDATE LOBE RESECTION FOR HILAR CHOLANGIOCARCINOMA IN A PATIENT WITH GBWR < 0.8	no info	1	5	No	L. McCormack	no	Lmccormack@hospitalalemen.com		no - invalid email
2012	SUCCESSFUL SURGICAL MANAGEMENT OF SUBACUTE BUDD-CHIARI SYNDROME	no info	3	4	No	A. Mejia	no	alejandromejia@mhd.com
2012	TRANSHEPATIC-TRANSANASTOMOTIC STENTS IN BILE DUCT INJURY REPAIR: AN ANSWERED DILEMMA	yes	213	3	No	M. Mercado	no	email dr. mercado - mamercado@quetzal.innsz.mx		no - invalid email
2012	PANCREATIC ANASTOMOSIS IN THE SOFT PANCREAS AFTER PANCREATICODUODENAL RESECTION	no info	0	14	No	W. G. Michael	no	Dr. Cooperman - avram.cooperman@gmail.com
2012	IS PREOPERATIVE IMAGING PREDICTIVE OF OUTCOME IN PATIENTS UNDERGOING TOTAL PANCREATECTOMY WITH ISLET AUTOTRANSPLANTATION FOR CHRONIC PANCREATITIS?	yes	46	3	No	K. A. Morgan	no	morganka@musc.edu
2012	COLORECTAL METASTASES TO THE PANCREAS: A SINGLE INSTITUTION EXPERIENCE	no info	9	3	No	L. C. Morley	no	garethmorisstiff@hotmail.com		no - invalid email
2012	ADENOCARCINOMA ARISING IN INDRADUCTAL PAPILLARY MUCINOUS NEOPLSMS (IPMN): A DIFFERENT BIOLOGICAL PROFILE AND CLINICAL OUTCOME	no info	30	3	No	G. Morris-Stiff	no	garethmorisstiff@hotmail.com		no - invalid email
2012	PANCREATIC ADENOCARCINOMAS ARISING ON THE BACKGROUND OF PANCREATIC CYSTIC DISEASE HAVE A BETTER OUTCOME THAN POOR OUTCOME	yes	111714	3	No	G. Morris-Stiff	no	garethmorisstiff@hotmail.com		no - invalid email
2012	TEMPORARY PORTO-CAVAL SHUNTING IN ORTHOTOPIC LIVER TRANSPLANTATION: IS THIS TECHNIQUE THE ANSWER TO BLEEDING AND EXPOSURE?	no info	0	14	No	S. N. Nadig	no	snadig@umich.edu		no - invalid
2012	A NOVEL TECHNIQUE FOR LAPAROSCOPIC PANCREATICOJEJUNOSTOMY	no info	1	14	No	B. T. Neichoy	no	dr. hughes - Steven.hughes@surgery.ufl.edu
2012	PERIPHERAL BLOOD MYELOID CELL POPULATIONS EXPAND IN PATIENTS WITH HEPATOCELLULAR CARCINOMA TREATED WITH RESECTION AND ABLATION, BUT NOT WITH ENDOLUMINAL THERAPY	yes	18	7	No	P. Newell	no	philippa.newell@gmail.com
2012	P53 MUTATIONAL ANALYSIS IS A BETTER PREDICTOR OF PROGNOSIS THAN HISTOLOGY IN PANCREATIC IPMN	yes	29	7	No	J. A. Nicholson	no	n/a
2012	MANAGEMENT OF THE DIFFICULT PANCREATIC STUMP AFTER PANCREATIC RESECTION	no info	0	14	No	N. N. Nissen	no	Nicholas.nissen@cshs.org
2012	USE OF HD VIDEO MICROSCOPY IN THE LOCAL RESECTION OF PANCREATIC HEAD AND AMPULLARY TUMORS	no info	0	14	No	N. N. Nissen	no	Nicholas.nissen@cshs.org
2012	HEPATIC ARTERIAL CLAMPING ALONE, RATHER THAN PORTAL TRIAD CLAMPING, CAN BE USED TO REDUCE PARENCHYMAL BLEEDING DURING LAPAROSCOPIC LIVER RESECTION	no info	0	14	No	N. O'rourke	no	orourke.nick@gmail.com
2012	CHOLEDOCHODUODENOSTOMY IS AN EXCELLENT ALTERNATIVE TO ROUX Y CHOLEDOCHOJEJUNOSTOMY	yes	63	3	No	J. G. Peacock	no	n/a
2012	HCC: RESECT OR TRANSPLANT	yes	268	3	No	R. Pieretti-Vanmarcke	no	rpierettivanmarcke@partners.org		no - invalid
2012	PATIENT AND COMMUNITY CHARACTERISTICS ARE ASSOCIATED WITH LONGITUDINAL HEALTHRELATED QUALITY OF LIFE IN LIVER TRANSPLANT RECIPIENTS	yes	0	6	No	L. Redhage	no	Dr. Moore - derek.moore@vanderbilt.edu
2012	INCIDENCE AND IMPLICATIONS OF IMPAIRED GLYCEMIC CONTROL FOLLOWING DISTAL PANCREATECTOMY	yes	137	3	No	M. Rogers	no	Dr. Morris-Stiff - garethmorisstiff@hotmail.com		no - invalid email
2012	THE STANDARDIZATION OF LAPAROENDOSCOPIC SINGLE SITE (LESS) CHOLECYSTECTOMY	no info	1	5	No	S. B. Ross	no	Dr. Rosemurgy - arosemurgy@hotmail.com
2012	LONG TERM FOLLOW-UP AFTER PRIMARY EXCISION OF DUODENAL NEUROENDOCRINE TUMORS, A CASE SERIES	no	5	3	No	J. W. Rostas	no	jrostas@usouthal.edu		no - invalid email
2012	SURGICAL TREATMENT FOR PRIMARY AND LOCALLY ADVANCED/METASTATIC SOFT-TISSUE SARCOMA INVOLVING THE PANCREAS AND LIVER	no info	52	3	No	M. Sabbaghian	no	n/a
2012	SORAFENIB INDUCED VASCULATURE CHANGES IMPROVES SURVIVAL WHEN COMBINED WITH YTTRIUM-90 RADIOEMBOLIZATION FOR THE TREATMENT OF ADVANCED HCC	yes	38	3	No	a. salman	no	ayat.salman@muhc.mcgill.ca
2012	TWO-STAGE LIVER RESECTION IN COLORECTAL CANCER (CRC) LIVER METASTASIS: SELECTION, MICROMETASTASIS AND PROGNOSIS	no info	133	3	No	L. T. Seeberg	no	sbseel@siv.no
2012	COMMON BILE DUCT EXPLORATION VIA CYSTIC DUCT WITH A SPECIAL REFERENCE TO SEPTUM-LIKE STRUCTURE AT THE JUNCTION: A SURGICAL PEARL TO AVOID BILE DUCT STRICTURE	no info	5	14	No	A. Shimizu	no	ashimizu@iwate-med.ac.jp
2012	ROUTINE AND SEAMLESS 3D LIVER LESION TARGETING FOR LAPAROSCOPIC ABLATION: ONE STEP CLOSER	no info	0	14	No	K. A. Simo	no	kerri.simomd@ProMedica.org
2012	THE PROGNOSTIC UTILITY OF FDG-PET CT IN THE EVALUATION OF PATIENTS WITH HEPATOCELLULAR CARCINOMA FOR LIVER TRANSPLANTATION	no	154	11	No	E. Simoneau	no	Dr. Metrakos - peter.metrakos@mcgill.ca
2012	IMPROVED SURVIVAL IN AFRICAN AMERICAN MALES WITH INTRAHEPATIC CHOLANGIOCARCINOMA LARGELY DUE TO INCREASED OPERATIVE TREATMENT	yes	2297	3	No	D. Sindram	no	David.Sindram@carolinashealthcare.org
2012	MULTIVISCERAL PANCREATIC RESECTIONS: ARE THEY WORTH THE RISK?	yes	191	3	No	A. Siripong	no	n/a
2012	A SURGEONS LEARNING EXPERIENCE OF PANCREATICODUODENECTOMIES (PD): IT CONTINUES DESPITE A DECADE LONG EXPERIENCE	no	245	3	No	V. Siripurapu	no	rohanjeyarajah@gmail.com (author is D. Rohan Jeyarajah)
2012	HOW TO DO A WHIPPLE IN APPROXIMATELY THREE HOURS: SEPARATION OF THE RIGHT COLON MESENTERY TO FIND THE SMV AND THE CONCEPT OF THE MESOPANCREAS	no info	0	14	No	V. Siripurapu	no	rohanjeyarajah@gmail.com (author is D. Rohan Jeyarajah)
2012	REFERRAL PATTERNS IN PANCREATIC CANCER TO A HIGH VOLUME CENTER; THE GASTROENETEROLOGIST REMAINS YOUR FRIEND	no info	348	3	No	V. Siripurapu	no	rohanjeyarajah@gmail.com (author is D. Rohan Jeyarajah)
2012	SUPERIOR MESENTERIC VEIN (SMV) MARGIN POSITIVITY IN RESECTABLE PANCREATIC CANCER CORRELATES WITH HIGH SUEPERIOR MESENTERIC ARTERY (SMA) MARGIN POSITIVITY; IS VEIN RESECTION ADVISIBLE?	no info	97	3	No	V. Siripurapu	no	rohanjeyarajah@gmail.com (author is D. Rohan Jeyarajah)
2012	TUMOR LOCATION IN PANCREATIC CANCER INFLUENCES LYMPH NODE POSITIVITY	yes	622	3	No	V. Siripurapu	no	rohanjeyarajah@gmail.com (author is D. Rohan Jeyarajah)
2012	SURROGATE ONCOLOGIC MARKERS FOR LONG TERM SURVIVAL ARE IMPROVED WITH THE USE OF MINIMAL ACCESS SURGERY FOR PANCREATIC CANCER	yes	289	3	No	J. A. Stauffer	no	stauffer.john@mayo.edu
2012	RECOGNITION OF WEAK SIGNALS MAY FACILITATE THE DETECTION AND PREVENTION OF LAPAROSCOPIC BILE DUCT INJURIES. A MULTIVARIATE HUMAN FACTORS ANALYSIS	yes	431	3	No	L. Stewart	no	Dr. Way - lwway@aol.com
2012	ISOLATED TOTAL CAUDATE LOBECTOMY UNDER EXTRAHEPATIC GLISSONEAN APPROACH	no info	0	14	No	A. Sugioka	no	sugioka@fujita-hu.ac.jp
2012	MAJOR PANCREATIC RESECTIONS CAN SAFELY BE PERFORMED AT A COMMUNITY HOSPITAL	no info	99	3	No	P. Suman	no	suman.paritosh@gmail.com
2012	TWO CASES OF SPONTANEOUS REGRESSION OF HEPATOCELLULAR CARCINOMA WITH EXTRAHEPATIC METASTASIS	no info	2	4	No	C. Takeura	no	Dr. Sugioka - sugioka@fujita-hu.ac.jp
2012	KI-67 INDEX PREDICTS PROGRESSION FREE SURVIVAL IN PRIMARY PANCRAETIC NEUROENDOCRINE TUMORS AND NEUROENDOCRINE LIVER METASTASES	no info	161	3	No	S. J. Temple	no	Dr. Wei - Alice.Wei@uhn.ca
2012	107 PANCREATIC RESECTIONS: FACTORS AFFECTING MORTALITY AND MORBIDITY	yes	107	3	No	V. M. Thumma	no	Dr. Sastry - drrasastry@gmail.com
2012	RISK FACTORS FOR DELAYED GASTRIC EMPTYING AFTER PANCREATICODUODENECTOMY	yes	64	3	No	V. M. Thumma	no	Dr. Sastry - drrasastry@gmail.com
2012	EXTENDED RIGHT HEMIHEPATECTOMY AND LEFT METASTASECTOMY AFTER IN SITU SPLIT. A NEW SURGICAL STRATEGY PERFORMED IN TWO STAGES TO ACHIEVE RESECTABILITY OF BILOBAR LIVER METASTASES	no info	0	14	No	E. Vicente	no	n/a
2012	SURGERY FOR LIVER MALIGNANCIES WITH TUMOR THROMBUS EXTENDING INTO THE SUPRA-DIAPHRAGMATIC INFERIOR VENA CAVA AND RIGHT ATRIUM WITHOUT THE USE OF CARDIOPULMONARY BYPASS	no info	0	14	No	E. Vicente	no	n/a
2012	LAPAROSCOPIC MICROWAVE ABLATION OF HEPATOCELLULAR CARCINOMA IN PATIENTS WITH PORTAL HYPERTENSION; TECHNICAL TIPS FOR A SAFE PROCEDURE	no info	0	14	No	M. Vivanco	no	n/a
2012	THE KIND AND INFLUENCE OF THE DRAIN INFECTION UPON THE SEVERITY OF POST OPERATIVE PANCREATIC FISTULA	yes	76	3	No	K. Watanabe	no	Dr. Taniguchi - m-tani@asahikawa-med.ac.jp
2012	SKELTONIZATION NOT RESECTION OF THE SUPERIOR MESENTERIC VEIN IN PDR	no info	0	14	No	M. G. Wayne	no	waynedocny@yahoo.com
2012	COMPREHENSIVE DNA METHYLATION ANALYSIS OF HEPATOCELLULAR CARCINOMA	no info	10	7	No	D. J. Weisenberger	no	dan.weisenberger@med.usc.edu
2012	THE PREVALENCE AND SIGNIFICANCE OF EXTRAPANCREATIC CYSTS IN PATIENTS WITH PANCREATIC CYSTIC LESIONS	yes	1424	3	No	M. J. Weiss	no	Dr. Allen - allenp@mskcc.org
2012	RENAL CELL CARCINOMA METASTASES TO THE PANCREAS: A WORTHWHILE INDICATION FOR RESESCTION	no info	27	3	No	K. E. Westesson	no	westesk@ccf.org		no - invalid
2012	TRANSECTION OF LEFT SEGMENTAL HEPATIC DUCTS DURING LAPAROSCOPIC CHOLECYSTECTOMY	no info	3	4	No	A. M. Williams	no	email for Dr. Gedaly: rgeda2@uky.edu
2012	ENDEMIC GALLBLADDER CANCER: IS THERE A ROLE FOR PROPHYLACTIC CHOLECYSTECTOMY?	no info	0	9	No	E. R. Witkowski	no	Dr. Tseng - jftseng@bidmc.harvard.edu
2012	THE UTILITY OF POSITRON EMISSION TOMOGRAPHY IN HEPATOCELLULAR CARCINOMA	no info	79	3	No	S. M. Wong	no	Dr. Metrakos - peter.metrakos@mcgill.ca
2012	VASCULAR RESECTION AND RECONSTRUCTION FOR A REPLACED RIGHT HEPATIC ARTERY CAN BE AVOIDED DURING A PANCREATICODUODENECTOMY PROCEDURE	no info	100	3	No	J. M. Zakhary	no	Dr. Zibari - gzibari@lsuhsc.edu
2012	EXPERIENCE WITH SELECTIVE TRANSARTERIAL EMBOLIZATION AS A THERAPEUTIC OPTION FOR FOCAL NODULAR HYPERPLASIA: A CASE SERIES	no info	7	11	No	M. Zanini	no	Dr. Abouljoud - maboulj5@hfhs.org		YES - yes
2012	DONOR-DERIVED METASTATIC PARAGANGLIOMA IN A LIVER TRANSPLANT RECIPIENT: DIAGNOSIS AND TREATMENT	no info	1	4	No	Z. Zarrinpar	no	Dr. Busuttil - rbusuttil@mednet.ucla.edu
2012	THE USE OF HYDROGEN PEROXIDE TO IDENTIFY SMALL BILE LEAKS DURING LIVER RESECTION	no info	82	14	No	A. Zarrinpar	no	azarrinpar@mednet.ucla.edu
2012	INHIBITION OF CASPASES 3/7 ENZYME ACTIVITY WITH AN INFUSION OF TIMP-3 MINIMIZES APOPTOSIS IN NORMAL LIVERS DURING SUB-LETHAL TOTAL HEPATIC ISCHEMIA IN RATS	yes	16	7	No	A. J. Cohen	no	acohen@ochsner.org
2013	CHARACTERIZATION OF PANCREATIC ADENOCARCINOMA OF PRIMARY AND PERITONEAL METASTASIS A PILOT STUDY USING BIOMARKERS FOR METASTASIS (EMT)	no info	0	3	No	A. Abrams	no	abramsa3@gmail.com
2013	CLASSIFICATION OF THE ANATOMICAL VARIATION OF THE RIGHT POSTERIOR SECTORAL BILE DUCT	no info	126	3	No	H. M. Alghamdi	no	hananghamdi@yahoo.com		YES - no
2013	ELEVATED RISK OF BILE LEAK FOLLOWING HEPATIC RESECTION AMONG PATIENTS EXPOSED TO BEVACIZUMAB	yes	297	3	No	B. D. Nath	no	n/a
2013	THE EFFECT OF CHEMOTHERAPY ON THE SHORT TERM OUTCOME OF LIVER RESECTION – A COMPARISON OF NO CHEMOTHERAPY VERSUS CONVENTIONAL CHEMOTHERAPY VERSUS BIOLOGICAL AGENTS	yes	226	11	No	G. C. Ndlovu	no	gndlovu1@csir.co.za
2013	THE VALIDATION OF A CLASSIFICATION SYSTEM FOR BILIARY COMPLICATIONS FOLLOWING ORTHOTOPIC LIVER TRANSPLANTATION (OLT)	yes	189	3	No	A. Neville	no	aneville@toh.ca
2013	HEPATECTOMY FOR BENIGN PATHOLOGY IN 112 PATIENTS AT A SINGLE TERTIARY CARE INSTITUTION	no info	112	3	No	S. D. Nichols	no	Dr. Bloomston - mark.bloomston@osumc.edu		no - invalid
2013	A SIMPLE SYSTEM FOR VIDEO OF OPEN SURGICAL CASES	no info	1	5	No	N. N. Nissen	no	Nicholas.nissen@cshs.org
2013	ENUCLEATION OF HEPATIC NEUROENDOCRINE TUMOR METASTASES	no info	5	5	No	N. N. Nissen	no	Nicholas.nissen@cshs.org
2013	HIGH-RISK CENTRAL PANCREATECTOMY MANAGED WITH DUAL PANCREATIC-ENTERIC ANASTOMOSIS	no info	1	4	No	N. N. Nissen	no	Nicholas.nissen@cshs.org
2013	MAKING HEPATIC TRISECTIONECTOMIES FOR HILAR CHOLANGIOCARCINOMA SAFER BY RETAINING SUB-SEGMENT 4A	no info	0	14	No	A. A. Alseidi	no	Adnan.alseidi@virginiamason.org	Yes - no
2013	INCIDENCE OF COAGULOPATHY DURING HEPATECTOMIES AND THE EFFECT OF EPIDURAL USE ON POSTOPERATIVE COMPLICATIONS	no	16015	3	No	A. Amini	no	albertamini23@gmail.com
2013	HEPATIC ADENOMATOSIS PRESENTING WITH HEMORRHAGIC SHOCK: A CASE REPORT AND REVIEW OF THE LITERATURE	no info	1	4	No	B. M. Amundsen	no	n/a
2013	IS TOTAL PANCREATECTOMY FOR DUCTAL ADENOCARCINOMA OF THE HEAD OF THE PANCREAS JUSTIFIED BASED ON THE RISK OF TUMOR MULTICENTRICITY?	no info	858	3	No	A. Andreou	no	andreas.andreou@charite.de
2013	ASSOCIATING LIVER PARTITION AND PORTAL VEIN LIGATION FOR STAGE HEPATECTOMY (ALPPS). A MODERN APPROACH FOR AVOIDING POSTOPERATIVE LIVER FAILURE	no info	1	4	No	V. Ardiles	no	Dr. De Santibanes - victoria.ardiles@hospitalitaliano.org.ar
2013	THE EVALUATION AND STRATIFICATION OF PERIOPERATIVE RISK FACTORS FOR DELAYED GASTRIC EMPTYING AFTER PANCREATICODUODENECTOMY IN ORDER TO IDENTIFY SELECTION CRITERIA FOR PROPHYLACTIC SURGICAL ENTERAL ACCESS	yes	64	3	No	M. B. Bailey	no	Dr. Davenport - daniel.davenport@uky.edu
2013	HETEROGENEITY OF PANCREATIC CANCER ASSOCIATED FIBROBLASTS	yes	30	7	No	H. L. Beal	no	Dr. Shea - jill.shea@hsc.utah.edu
2013	EVOLUTION OF ROBOTIC SURGICAL TECHNIQUE: THE LEARNING CURVE OF ROBOTIC ASSISTED PANCREATICODUODENECTOMY	yes	113	11	No	B. A. Boone	no	zureikatah@upmc.edu (emailing Zureikat)
2013	INITIAL EXPERIENCE WITH ROBOTIC LIVER RESECTIONS	no info	3	5	No	S. G. Carpenter	no	carpenter.susanne@mayo.edu
2013	CONTEMPORARY DIFFERENCES IN POSTOPERATIVE OUTCOMES FOLLOWING LAPAROSCOPIC VERSUS OPEN DISTAL PANCREATECTOMY FOR PANCREATIC ADENOCARCINOMA	yes	343	3	No	E. P. Ceppa	no	eceppa@iupui.edu		YES - no
2013	ZBP-89 FACILITATES DEATH OF HEPATOCELLULAR CARCINOMA CELLS VIA MULTIPLE CHANNELS	no info	0	12	No	G. G. Chen	no	Dr. Yun - yunjp@sysucc.org.cn
2013	FACTORS AFFECTING LIKELIHOOD OF SURGICAL REFERRAL FOR HEPATIC MALIGNANCIES	yes	4359	3	No	A. P. Chidi	no	apc10@pitt.edu
2013	DOES TYPE OF COLORECTAL PROCEDURE IMPACT COMPLICATION RATES FOLLOWING COMBINED LIVER AND COLORECTAL RESECTIONS FOR METASTATIC COLORECTAL CANCER? ANALYSIS OF AMERICAN COLLEGE OF SURGEONS NATIONAL SURGICAL QUALITY IMPROVEMENT PROGRAM (ACS NSQIP)	yes	345	3	No	S. W. Cho	no	Dr. Hansen - phansen@orclinic.com
2013	HIGH RATES OF PATHOLOGIC COMPLETE OR NEAR COMPLETE RESPONSE FOLLOWING NEOADJUVANT CHEMOTHERAPY AND STEREOTACTIC BODY RADIATION THERAPY FOR BORDERLINE RESECTABLE PANCREATIC CANCER	yes	35	3	No	M. Chuong	no	Dr. Shridhar - ravi0421@yahoo.com
2013	HEALTH-RELATED QUALITY OF LIFE FOR PATIENTS WITH PANCREATIC CANCER: A POPULATION-BASED STUDY	yes	74	6	No	C. J. Clark	no	cjclark@wakehealth.edu
2013	DOCTOR, WHY DIDN’T THAT GALL BLADDER COME OUT?	no info	417	3	No	M. Colaco	no	Dr. Hagopian - ehagopian@meridianhealth.com
2013	THE USE OF SYSTEMIC ANTICOAGULATION IS SAFE IN PATIENTS UNDERGOING CURATIVE RESECTION OF PANCREATIC DUCTAL ADENOCARCINOMA	yes	118	3	No	A. B. Cooper	no	n/a
2013	LUNG AND LIVER RESECTION FOR COLORECTAL METASTASES: A SURVIVAL ANALYSIS	no	175	3	No	S. Coughlin	no	Dr. Hernandez-Alejandro - Roberto.hernandezalejandro@lhsc.on.ca
2013	PORTAL VEIN THROMBOSIS – HOW MUCH IS TOO MUCH WHEN IT COMES TO COST-EFFECTIVE LIVER TRANSPLANTATION?	no info	0	13	No	L. Dageford	no	Dr. Moore - derek.moore@vanderbilt.edu
2013	TWO STAGED HEPATECTOMY FOR ‘UNRESECTABLE’ COLORECTAL LIVER METASTASES: THE USE OF THE ALPPS PROCEDURE TO INDUCE RAPID HYPERTROPHY IN SCENARIOS WHERE TRADITIONAL RESECTION STRATEGIES WERE DEEMED TO BE SUBOPTIMAL	no info	3	4	No	K. P. Croome	no	Dr. Hernandez-Alejandro - Roberto.hernandezalejandro@lhsc.on.ca
2013	MANAGEMENT OF CELIAC ARTERY STENOSIS IN PANCREATICODUODENECTOMY	no info	3	3	No	S. Damle	no	Dr. Rocha - Flavio.rocha@virginiamason.org		no - invalid email
2013	SYMPTOMATIC WALLED-OFF PANCREATIC NECROSIS (WOPN): IS THERE STILL A ROLE FOR THE SURGEON?	no info	149	3	No	S. Damle	no	Dr. Rocha - Flavio.rocha@virginiamason.org		no - invalid email
2013	ANALYSIS OF PRE-OPERATIVE RISK FACTORS PREDICTIVE OF REOPERATIONS WITHIN 30 DAYS IN PATIENTS UNDERGOING HEPATIC RESECTIONS FOR MALIGNANCY	yes	4812	3	No	M. Dhir	no	Dr. Are - care@unmc.edu
2013	RADIOGRAPHIC CHANGES ASSOCIATED WITH SURGICAL RESECTION FOLLOWING NEOADJUVANT RADIATION THERAPY FOR LOCALLY ADVANCED PANCREATIC ADENOCARCINOMA	no	54	3	No	A. S. Dholakia	no	Email Dr. Herman (jherma15@jhmi.edu)
2013	PREDICTORS OF LENGTH OF ICU STAY AND MORTALITY AFTER LIVER TRANSPLANT	yes	645	3	No	S. Dumitra	no	Dr. Barkun - jeffrey.barkun@muhc.mcgill.ca
2013	EVALUATION OF RESISTANCE AS A MEASURE OF SUCCESSFUL TUMOR ABLATION DURING IRREVERSIBLE ELECTROPORATION	yes	12	11	No	E. M. Dunki-Jacobs	no	Dr. Martin -- robert.martin@louisville.edu					make sure you aren't looking at one that says pancreas... this ones hepatic
2013	PORTAL VEIN THROMBOSIS SECONDARY TO HEPATOPANCREATICOBILIARY MALIGNANCY: AN ASSESSMENT OF INCIDENCE, RISK FACTORS, AND CLINICAL MANAGEMENT	yes	1072	11	No	E. M. Dunki-Jacobs	no	Dr. Martin -- robert.martin@louisville.edu
2013	PROGNOSTIC SIGNIFICANCE OF PET TAC IN NEUROENDOCRINE TUMOR OF THE PANCREAS	yes	78	3	No	H. Duran	no	Dr. Ielpo - ielpo.b@gmail.com
2013	HYBRID LAPAROSCOPIC-ROBOTIC PANCREATICODUODENECTOMY AS AN INSTRUCTIONAL VIDEO	no info	1	4	No	K.M. El-Hayek	no	elhayek@ccf.org
2013	INCIDENCE OF POST-OPERATIVE INFECTIOUS COMPLICATIONS IN COMPLEX HEPATOBILIARY SURGERY UTILIZING PREOPERATIVE BROAD SPECTRUM ANTIBIOTIC AND ANTIFUNGAL COVERAGE IN CONJUNCTION WITH INTRAOPERATIVE CULTURES	no info	163	3	No	A. H. Fathi	no	ahf59@yahoo.com
2013	CYTOLOGIC ATYPIA AND CANCER-ASSOCIATED MUTATIONAL CHANGES IN CYTOCENTRIFUGATION SUPERNATANT FLUID	yes	129	7	No	L. Freed	no	Dr. Jackson - saj@redpathip.com
2013	HISTOPATHOLOGICAL ANALYSIS OF NONFUNCTIONING PANCREATIC NEUROENDOCRINE TUMORS	no info	7	4	No	M. Furukouri	no	Dr. Taniguchi - m-tani@asahikawa-med.ac.jp
2013	MINIMALLY INVASIVE RESECTION OF COLORECTAL CANCER LIVER METASTASES SHORTENS THE INTERVAL TO INITIATION OF ADJUVANT SYSTEMIC CHEMOTHERAPY: A CASE-CONTROL STUDY	yes	58	3	No	B. J. Golas	no	n/a
2013	EARLY PREDICTOR OF OUTCOME AFTER PANCREATICODUODENECTOMY WITH POSTOPERATIVE PANCREATIC FISTULA RISK CALCULATOR	yes	146	3	No	J. A. Graham	no	jay.a.graham@gunet.georgetown.edu
2013	ECHINOCOCCAL LIVER DISEASE IN NEW YORK; AN IMPORTED PROBLEM	no info	7	3	No	L. Gutnik	no	n/a
2013	ENDOSCOPIC ULTRASOUND IS A SAFE AND EFFECTIVE ALTERNATIVE TO PORTAL NODE SAMPLING IN PATIENTS ENROLLED THE CHOLANGIOCARCINOMA TRANSPLANT PROTOCOL	no info	12	9	No	S. I. Hanish	no	shanish@emory.edu		no - invalid
2013	EFFECT OF ALCOHOL ON DEVELOPMENT AND PROGRESSION OF SEVERE ACUTE PANCREATITIS (SAP) IN EXPERIMENTAL RAT MODELS	no info	0	12	No	E. M. Hanna	no	Dr. McKillop - iain.mckillop@carolinashealthcare.org
2013	DOES LAPAROSCOPIC LIVER RESECTION MITIGATE COMPLICATIONS	yes	572	3	No	J. F. Buell	no	jbuell1@tulane.edu
2013	ANATOMICAL HEPATECTOMY USING ICG NAVIGATION SYSTEM	no info	22	14	No	S. Hayami	no	Dr. Yamaue - yamaue-h@wakayama-med.ac.jp
2013	ELEVATED HEMOGLOBIN A1C IN THE DIAGNOSIS OF PANCREATIC DUCTAL ADENOCARCINOMA AND THE RELATIONSHIP TO POSTOPERATIVE MORBIDITY AND DIABETES	no	48	3	No	K. C. Hewitt	no	Dr. Scaife - courtney.scaife@hci.utah.edu
2013	PROGNOSTIC FACTORS AFTER HEPATECTOMY FOR INTRAHEPATIC CHOLANGIOCARCINOMA: RELEVANCE OF LYMPH NODE DISSECTION	no info	45	2	No	T. Hibi	no	taizohibi@z3.keio.jp
2013	INDICATION OF SURGICAL RESECTION FOR BRANCH DUCT TYPE IPMN	no info	148	3	No	S. Hirono	no	Dr. Yamaue - yamaue-h@wakayama-med.ac.jp
2013	ROBOTIC ASSISTED SURGERY FOR PANCREATIC NEUROENDOCRINE TUMORS	no info	44	3	No	M. E. Hogg	no	Dr. Lee -- leek@upmc.edu
2013	MAJOR HEPATECTOMY FOR COLORECTAL LIVER METASTASIS IN THE ELDERLY	yes	56	3	No	B. Howe	no	n/a
2013	MANAGEMENT OF MEDIASTINAL PANCREATIC PSEUDOCYSTS: A CASE REPORT AND REVIEW OF THE LITERATURE	no info	1	4	No	D. V. Hughes	no	n/a
2013	RISK ASSESSMENT OF PANCREATIC FISTULA AFTER PANCTRATICODUODENECTOMY BY MEASURING OF PURE PANCREATIC JUICE AMYLASE LEVEL	no	11	3	No	K. Imai	no	Dr. Taniguchi - tony@isis.ocn.ne.jp
2013	OPTIMAL SURGICAL STRATEGY FOR ADVANCED GALLBLADDER CARCINOMA: SINGLE-CENTER ANALYSIS OF LONG-TERM SURVIVORS	yes	63	3	No	O. Itano	no	laplivertiger@gmail.com
2013	A CT-BASED METHOD OF PREDICTING PANCREATIC FISTULA BEFORE PANCREATECTOMY	yes	44	3	No	W. Johnston	no	philippa.newell@gmail.com
2013	THE COST OF FUTILITY: MEASURING THE ECONOMIC IMPACT OF PERCUTANEOUS CHOLECYSTOSTOMY IN MORIBUND PATIENTS	yes	17	3	No	S. D. Kachare	no	Dr. Vohra - vohran@ecu.edu
2013	THE IMPACT OF SURGICAL MARGIN STATUS ON OUTCOME AFTER HEPATIC RESECTION FOR COLORECTAL METASTASIS	yes	105	3	No	S. Kaihara	no	aihara@kcho.jp
2013	INTRADUCTAL PAPILLARY NEOPLASM OF THE BILE DUCT	no info	1	4	No	A. Kamyab	no	armin.kamyab@coxhealth.com
2013	LAPAROSCOPIC CYSTOGASTROSTOMY	no info	1	4	No	A. Kamyab	no	armin.kamyab@coxhealth.com
2013	CLAVIEN COMPLICATIONS OF LAPAROSCOPIC VS. OPEN LIVER RESECTION: A RETROSPECTIVE REVIEW	yes	572	3	No	E. Kane	no	n/a
2013	CLINICO-PATHOLOGICAL FACTORS ASSOCIATED WITH PROGNOSIS IN PRIMARY INTRA-HEPATIC CHOLANGIOCARCINOMA: A SINGLE CENTER EXPERIENCE	yes	59	3	No	Z. S. Kanji	no	Zaheer.kanji@ubc.ca
2013	THE IMPACT OF PYLORUS-RESECTING PANCREATICODUODENECTOMY-THE SHORT AND LONG TERM OUTCOMES IN A PROSPECTIVE RANDOMIZED CONTROLLED TRIAL	no	130	3	No	M. Kawai	no	Dr. Yamaue - yamaue-h@wakayama-med.ac.jp
2013	BILIARY ACCESS IN PATIENTS WITH A ROUX-EN-Y GASTRIC BYPASS: WHOM AND HOW	no info	3	3	No	A. Khithani	no	rohanjeyarajah@gmail.com (author is D. Rohan Jeyarajah)
2013	OUTCOMES OF LIVER RESECTION VERSUS OPERATIVE BILIARY DRAINAGE FOR RECURRENT PYOGENIC CHOLANGITIS IS OPERATIVE BILIARY DRAINAGE STILL RELEVANT IN THE MODERN ERA?	no	51	4	No	Y. Koh	no	yexinkoh@hotmail.com		no - invalid
2013	SURGICAL INTERVENTION FOR INTRADUCTAL HEPATOCELLULAR CARCINOMAS CAUSING JAUNDICE SECONDARY TO BILIARY OBSTRUCTION	no info	5	3	No	Y. Koh	no	yexinkoh@hotmail.com		no - invalid
2013	PANCREATIC NEUROENDOCRINE TUMORS: TUMOR SIZE, RADIOLOGIC FEATURES, AND ASSOCIATED HIGH RISK FACTORS	yes	86	3	No	S. L. Koonce	no	Dr. Eck - eck.dustin@mayo.edu		no - invalid
2013	THE NEW STAPLING TECHNIQUE REINFORCED WITH THE ABSORBABLE SHEET FOR THE DISTAL PANCREATECTOMY	no info	51	14	No	I. Koyama	no	Dr. Okamoto - kokamoto@saitama-med.ac.jp
2013	OPERATIVE MANAGEMENT OF NECROTIZING PANCREATITIS AT A SINGLE INSTITUTION	no info	29	3	No	K. J. Lafaro	no	klafaro@gmail.com
2013	RE-RECURRENT NON-ALCOHOLIC STEATOHEPATITIS AFTER RE-DO LIVER TRANSPLANTATION	no info	1	4	No	V. Leow	no	n/a
2013	A NOVEL PROCEDURE FOR MANAGING EXCLUDED SEGMENTAL POSTOPERATIVE BILE DUCT LEAK	no info	1	4	No	D. J. Lerner	no	n/a
2013	ENDOSCOPIC DRAINAGE IS A SAFE AND EFFECTIVE INITIAL MANAGEMENT OF SELECTED PANCREATIC PSEUDOCYSTS	no info	29	3	No	C. Luu	no	n/a
2013	THREE-DIMENSIONAL (3-D) CT FOR VIRTUAL SIMULATION/SURGICAL PLANNING OF PANCREATIC NEUROENDOCRINE TUMORS – ENUCLEATION VS. RESECTION	no info	0	3	No	A. V. Maker	no	amaker@uic.edu
2013	IMAGE GUIDED PARENCHYMAL TRANSECTION REDUCES BLOOD LOSS DURING THE FIRST YEAR OF SOLO HPB PRACTICE	no info	6	4	No	J. Mandell	no	n/a
2013	USING IMAGE-GUIDANCE AND 3-D MODELS FOR NEEDLE PLACEMENT DURING IRE-NANOKNIFE SURGERIES	no info	1	14	No	R. C. Martin	no	Dr. Dumpuri - prashanth.dumpuri@vanderbilt.edu		no - invalid
2013	PREDICTORS OF OUTCOMES IN LIVER TRANSPLANTATION FOR HEPATOCELLULAR CARCINOMA IN THE MELD ERA	yes	135	3	No	A. Mathur	no	n/a
2013	SURVIVAL AND CANCER RECURRENCE IN LIVER TRANSPLANTATION FOR HEPATOCELLULAR CARCINOMA IN THE LAST DECADE: IS THERE PROGRESS?	yes	208	3	No	A. mathur	no	n/a
2013	PREDICTORS OF INITIATION AND COMPLETION OF ADJUVANT THERAPY AFTER SURGICAL RESECTION FOR PANCREATIC ADENOCARCINOMA	yes	93	3	No	L. M. Mazer	no	Dr. Vollmer - Charles.Vollmer@uphs.upenn.edu		YES- no
2013	COMBINED ORTHOTOPIC LIVER TRANSPLANT WITH PANCREATICODUODENECTOMY	no info	8	14	No	M. G. Mesleh	no	mgmesleh@gmail.com
2013	TECHNIQUE OF LAPAROSCOPIC CHOLEDOCHODUODENOSTOMY	no info	1	14	No	M. G. Mesleh	no	mgmesleh@gmail.com
2013	LAPAROSCOPIC VISUALIZATION OF LESIONS AT THE HEPATIC DOME USING NOVEL TELESCOPES: VARIABLE-DIRECTION-OF-VIEW TELESCOPE AND DEFLECTABLE TELESCOPE	no info	0	14	No	N. N. Nissen	no	Nicholas.nissen@cshs.org
2013	TECHNIQUES FOR ENUCLEATION OF PANCREATIC MASSES	no info	0	14	No	N. N. Nissen	no	Nicholas.nissen@cshs.org
2013	BODY MASS INDEX (BMI): DOES IT MAKE A DIFFERENCE IN PANCREATICODUODENECTOMY OUTCOME?	yes	162	3	No	H. Osman	no	Dr. Jeyarajah - rohanjeyarajah@gmail.com
2013	HEPATO-PANCREATO-BILIARY (HPB) SURGERY FELLOWS: WHAT IS AFTER FELLOWSHIP? A SINGLE FELLOWSHIP EXPERIENCE	no info	6	6	No	H. Osman	no	Dr. Jeyarajah - rohanjeyarajah@gmail.com
2013	INTRAOPERATIVE ESTIMATED BLOOD LOSS PREDICTS NEED FOR ICU CARE: A SINGLE CENTER EXPERIENCE	yes	253	3	No	H. Osman	no	Dr. Jeyarajah - rohanjeyarajah@gmail.com
2013	NOT ALL NODES ARE THE SAME: NODAL STATIONS VARIABILITY IN PANCREATICODUODENECTOMY (PD) AND ROLE IN DECISION MAKING	no	88	3	No	H. Osman	no
2013	THE NEED FOR JEJUNAL FEED OR TPN AFTER PANCREATICODUODENECTOMY (PD): IS IT PREDICTABLE?	no	274	3	No	H. Osman	no	Dr. Jeyarajah - rohanjeyarajah@gmail.com
2013	TOTAL PANCREATO DUODENECTOMY WITH PORTACAVAL SHUNT FOR THE TREATMENT OF A PANCREATIC NEUROENDOCRINE TUMOR WITH PORTAL HYPERTENSION	no info	1	4	No	M. Palavecino	no	Dr. Pekolj - juan.pekolj@hospitalitaliano.org.ar
2013	ANTECOLIC VS. RETROCOLIC GASTRO/DUODENOJEJUNOSTOMY AND DELAYED GASTRIC EMPTYING (DGE) AFTER PANCREATICODUODENECTOMY	yes	265	11	No	A. D. Parmar	no	abparmar@utmb.edu		invalid email
2013	ISLET AUTOTRANSPLANTATION AFTER PANCREATECTOMY IN DIABETICS: IS IT WORTH IT?	no info	95	4	No	A. Patel	no	n/a
2013	RIGHT TRISECTONECTOMY WITH ANTERIOR APPROACH AND HANGING MANEUVER	no info	1	4	No	J. Pekolj	no	Dr. Pekolj - juan.pekolj@hospitalitaliano.org.ar
2013	PANCREATODUODENECTOMY IN AMERICA: DO PRACTICE PATTERNS VARY?	no info	343	11	No	S. C. Pitt	no	pitt@surgery.wisc.edu		Yes - no
2013	3-D ADVANCED IMAGING FOR DETAILED DELINEATION OF LIVER SEGMENTAL ANATOMY IN PRE-SURGICAL PLANNING	no info	29	14	No	S. Rahmanuddin	no	Dr. Cen - cen@usc.edu
2013	SURGICAL TREATMENT OF BENIGN BILIOPANCREATIC DISEASES IN PATIENTS OVER 60 YEARS	no info	69	3	No	E. Ramos Figueira	no	estelafigueira@me.com
2013	SURGICAL TREATMENT OF PANCREATIC NEUROENDOCRINE TUMORS: CLINICOPATHOLOGIC FEATURES	no info	30	3	No	E. Ramos Figueira	no	estelafigueira@me.com
2013	CLOSER PROXIMITY TO THE TRANSPLANT CENTER IS ASSOCIATED WITH BETTER PHYSICAL HEALTH-RELATED QUALITY OF LIFE AFTER LIVER TRANSPLANTATION	yes	2847	6	No	L. D. Redhage	no	n/a
2013	ASSOCIATION OF CONGENITAL PORTOSYSTEMIC SHUNT (CEPS) WITH HEPATOMA	no info	1	4	No	A. Rege	no	aparna.rege@duke.edu
2013	FINANCIAL IMPLICATIONS OF COMMON BILE DUCT INJURIES DURING CHOLECYSTECTOMY: ANALYSIS OF THE NATIONWIDE INPATIENT SAMPLE OVER A 10-YEAR PERIOD	no info	46769	3	No	T. Rogers	no	Sebastian.delafuente.md@flhosp.org
2013	CORRECTION OF PRE-OPERATIVE ANEMIA WITHOUT BLOOD PRODUCTS MAY REDUCE THE NEED TO TRANSFUSE PATIENTS AFTER A PANCREATICODUODENECTOMY	no info	3	4	No	A. J. Rubinstein	no	n/a
2013	ROBOTIC-ASSISTED RIGHT HEPATIC RESECTION, EXTRAHEPATIC VEIN LIGATION	no info	1	5	No	M. S. Sabbaghian	no	n/a
2013	IPMN TYPE BUT NOT GRADE OF DYSPLASIA IS ASSOCIATED WITH SMOKING	yes	264	3	No	K. M. Shaffer	no	Dr. Schmidt - maxschmi@iupui.edu
2013	COMPARISON OF MICROWAVE ABLATION AND TRANSCATHETER ARTERIAL CHEMOEMBOLIZATION IN THE TREATMENT OF HEPATOCELLULAR CARCINOMA	no	58	3	No	L. A. Shirley	no	lawrence.shirley@osumc.edu
2013	ROBOTIC TRANSGASTRIC CYSTGASTROSTOMY AND PANCREATIC DEBRIDEMENT	no info	1	14	No	K. A. Simo	no	kerri.simomd@ProMedica.org
2013	DISTINCTIVE LYSOPHOSPHATIDIC ACID RECEPTOR EXPRESSION IN HEPATOCELLULAR CARCINOMA	no	0	7	No	N. J. Skill	no	nskill@iupui.edu		YES - no
2013	THE CONTRIBUTION OF FOUNDER BRCA-PATHWAY GERMLINE MUTATIONS TO PANCREAS CANCER SUSCEPTIBILITY	no info	2	7	No	A. Smith	no	email(G. Zogopoulos)george.zogopoulos@mcgill.ca
2013	TRANSECTION OF THE NECK OF THE PANCREAS: PANCREATIC DUCT ISOLATION	no info	101	14	No	J. A. Stauffer	no	stauffer.john@mayo.edu
2013	PRIMARY CHOLEDOCHORRHAPHY IS ASSOCIATED WITH REDUCED COMPLICATIONS COMPARED TO T-TUBE DRAINAGE AFTER CHOLEDOCHOTOMY: A META-ANALYSIS AND A SYSTEMATIC REVIEW	yes	619	10	No	P. B. Sukharamwala	no	Prashantsukharamwala@yahoo.com
2013	THERE IS NO SIGNIFICANT DIFFERENCE IN PERIOPERATIVE OUTCOMES AFTER PANCREATICOGASTROSTOMY VS PANCREATICOJEJUNOSTOMY FOR RECONSTRUCTION FOLLOWING PACREATICODUDENECTOMY: A META-ANALYSIS AND SYSTEMATIC REVIEW	yes	669	10	No	P. Sukharamwala	no	Prashantsukharamwala@yahoo.com
2013	THE ANALYSIS OF FACTORS UPON VOLUMETRICAL AND FUNCTIONAL LIVER REGENERATION AFTER LIVER RESECTION	yes	50	3	No	M. Taniguchi	no	Dr. Taniguchi - m-tani@asahikawa-med.ac.jp
2013	MICRO-RNA PROFILING IN A MOUSE MODEL OF OBESITY-PROMOTED HCC	no info	0	12	No	K. J. Thompson	no	kyle.thompson@carolinas.org
2013	PATIENTS WITHOUT INSULIN-DEPENDENT DIABETES OR HYPERLIPIDEMIA HAVE INCREASED SURVIVAL AFTER PANCREATICODUODENECTOMY FOR PANCREATIC ADENOCARCINOMA	yes	413	2	No	P. Toomey	no	Dr. Rosemurgy - arosemurgy@hotmail.com
2013	CLINICAL AND FINANCIAL CONSIDERATIONS OF ESTABLISHING A HEPATOBILIARY CENTER DURING AN ECONOMIC CRISIS	no info	34	3	No	G. Tsoulfas	no	tsoulfasg@gmail.com
2013	NATIONAL TRENDS OF PANCREATIC CYSTIC LESIONS OVER AN 18-YEAR PERIOD	yes	109069	3	No	E. Vega	no	n/a
2013	RECOVERY OF HEPATIC FUNCTION AFTER GIANT HEPATIC ARTERY ANEURYSMECTOMY WITHOUT REVASCULARIZATION	no info	0	4	No	E. Vega	no	n/a
2013	BILIARY PERITONITIS DUE TO GASTRIC WALL PERFORATION AND LIVER PENETRATION AFTER SWALLOWING OF FOREIGN BODY	no info	1	4	No	L. M. Veltchev	no	drlmarinov@yahoo.com
2013	RADICAL SURGERY OF LIVER TUMORS INVOLVING HEPATIC VENOUS OUTFLOW WITH AND WITHOUT HIPOTHERMIC PROTECTION	no info	2	14	No	E. Vicente	no	n/a
2013	INTRAHEPATIC INTRADUCTAL PAPILAR MUCINOUS NEOPLASIA OF THE BILE DUCTS; A CASE SERIES OF THIS UNFREQUENT ENTITY	no info	2	3	No	M. Vivanco	no	n/a
2013	ADULT CHOLEDOCHAL CYST: A SINGLE CENTRE EXPERIENCE IN MANAGEMENT	no info	201	3	No	F. Vyas	no	Dr. Joseph - pj1982@cmcvellore.ac.in
2013	DIFFERENCES IN HOSPITAL CHARGES AND LENGTH OF STAYS IN PATIENTS UNDERGOING OPEN VERSUS LAPAROSCOPIC RADIOFREQUENCY ABLATION	yes	3708	3	No	L. Watkins	no	Dr. Eubanks - steve.eubanks.MD@flhosp.org
2013	PRIMARY HEPATIC LEIOMYOSARCOMA: SHOULD AN INTERNATIONAL DATABASE BE ESTABLISHED FOR BETTER STANDARD OF CARE?	no info	1	10	No	R. Wijaya	no	ramesh_wijaya@cgh.com.sg		yes - no
2013	NATIONALLY PLACED HIGH-RISK LIVER ALLOGRAFTS ARE A COST-EFFECTIVE MECHANISM OF INCREASING PATIENT ACCESS AND DECREASING WAIT LIST MORTALITY	no info	36	13	No	P. Witkowski	no	Dr. Millis - mmillis@surgery.bsd.uchicago.edu
2013	LAPAROSCOPIC VENTRAL HERNIA REPAIR IN THE CIRRHOTIC PATIENT, A SAFE ALTERNATIVE	yes	9419	3	No	B. A. Wormer	no	blair.wormer@carolinas.org
2013	A STEPWISE APPROACH TO RESECTION IN HEPATIC ADENOMATOSIS	no info	1	4	No	C. Yazici	no	cyazic2@uic.edu
2013	PREDICTORS OF EARLY POST-OPERATIVE MORTALITY FOLLOWING RIGHT EXTENDED HEPATECTOMY	yes	36	3	No	A. Zhuruk	no	Dr. Hernandez-Alejandro - Roberto.hernandezalejandro@lhsc.on.ca
											0
								56
											#NAME?
